# Supplementary material
Source: PubMed Central journal article supplement (PMC9574475)
Supplement: NIHMS1808115-supplement-Supplementary_Material.pdf [file NIHMS1808115-supplement-Supplementary_Material.pdf]

## Supporting Information for

### “Power considerations for generalized estimating equations analyses of four-level cluster randomized trials” by Wang et al.

#### Web Appendix A

##### Differences between $\mathbf{R}_i$ and two other correlation structures

An example of the extended nested exchangeable correlation structure for four-level clustered designs, with  $M = 2$ ,  $K = 2$ , and  $L = 2$  for each cluster, is

$$\text{corr}(\mathbf{Y}_i) = \left( \begin{array}{cc|cc|cc|cc} 1 & \alpha_0 & \alpha_1 & \alpha_1 & \alpha_2 & \alpha_2 & \alpha_2 & \alpha_2 \\ \alpha_0 & 1 & \alpha_1 & \alpha_1 & \alpha_2 & \alpha_2 & \alpha_2 & \alpha_2 \\ \hline \alpha_1 & \alpha_1 & 1 & \alpha_0 & \alpha_2 & \alpha_2 & \alpha_2 & \alpha_2 \\ \alpha_1 & \alpha_1 & \alpha_0 & 1 & \alpha_2 & \alpha_2 & \alpha_2 & \alpha_2 \\ \hline \alpha_2 & \alpha_2 & \alpha_2 & \alpha_2 & 1 & \alpha_0 & \alpha_1 & \alpha_1 \\ \alpha_2 & \alpha_2 & \alpha_2 & \alpha_2 & \alpha_0 & 1 & \alpha_1 & \alpha_1 \\ \hline \alpha_2 & \alpha_2 & \alpha_2 & \alpha_2 & \alpha_1 & \alpha_1 & 1 & \alpha_0 \\ \alpha_2 & \alpha_2 & \alpha_2 & \alpha_2 & \alpha_1 & \alpha_1 & \alpha_0 & 1 \end{array} \right).$$

According to [Teerenstra et al. \(2010\)](#), for a three-level CRT, denote  $Y_{ijk}$  as the outcome of evaluation  $k = 1, \dots, K$  from subject  $j = 1, \dots, M$  in cluster  $i = 1, \dots, N$ , denote  $\mathbf{X}_{ijk}$  as a list of covariates, and characterize the degree of similarities among the within-cluster outcomes through the nested exchangeable correlation structure with the following assumptions: (i) the correlation between different evaluations of the same subject is  $\text{corr}(Y_{ijk}, Y_{ijk'} | \mathbf{X}_{ijk}, \mathbf{X}_{ijk'}) = \alpha_0$  for  $k \neq k'$ ; (ii) the correlation between evaluations of different subjects but within the same cluster is  $\text{corr}(Y_{ijk}, Y_{ij'k'} | \mathbf{X}_{ijk}, \mathbf{X}_{ij'k'}) = \alpha_1$  for  $j \neq j'$ . Define  $\mathbf{Y}_i^{3\text{-level}} = (Y_{i11}, Y_{i12}, \dots, Y_{iMK})$ . An example of the nested exchangeable correlation structure for three-level clustered designs, with  $M = 2$  and

$K = 2$  for each cluster, is

$$\text{corr}(\mathbf{Y}_i^{3\text{-level}}) = \left( \begin{array}{cc|cc} 1 & \alpha_0 & \alpha_1 & \alpha_1 \\ \alpha_0 & 1 & \alpha_1 & \alpha_1 \\ \hline \alpha_1 & \alpha_1 & 1 & \alpha_0 \\ \alpha_1 & \alpha_1 & \alpha_0 & 1 \end{array} \right).$$

According to [Li et al. \(2018\)](#), for a cohort stepped wedge design, denote  $Y_{ijk}$  as the outcome of individual  $k = 1, \dots, K$  from cluster  $i = 1, \dots, N$  during period  $j = 1, \dots, M$ , denote  $\mathbf{X}_{ijk}$  as a list of covariates, and characterize the degree of similarities among the within-cluster outcomes through the block exchangeable correlation structure with the following assumptions: (i) the correlation between different individuals within the same cluster during the same period is  $\text{corr}(Y_{ijk}, Y_{ijk'} | \mathbf{X}_{ijk}, \mathbf{X}_{ijk'}) = \alpha_0$  for  $k \neq k'$ ; (ii) the correlation between different individuals within the same cluster but across periods is  $\text{corr}(Y_{ijk}, Y_{ij'k'} | \mathbf{X}_{ijk}, \mathbf{X}_{ij'k'}) = \alpha_1$  for  $j \neq j'$  and  $k \neq k'$ ; (iii) the correlation of the same individual across periods is  $\text{corr}(Y_{ijk}, Y_{ij'k} | \mathbf{X}_{ijk}, \mathbf{X}_{ij'k}) = \alpha_2$  for  $j \neq j'$ . Define  $\mathbf{Y}_i^{\text{CSW}} = (Y_{i11}, Y_{i12}, \dots, Y_{iMK})$ . An example of the block exchangeable correlation structure for cohort stepped wedge designs, with  $M = 2$  and  $K = 2$  for each cluster, is

$$\text{corr}(\mathbf{Y}_i^{\text{CSW}}) = \left( \begin{array}{cc|cc} 1 & \alpha_0 & \alpha_2 & \alpha_1 \\ \alpha_0 & 1 & \alpha_1 & \alpha_2 \\ \hline \alpha_2 & \alpha_1 & 1 & \alpha_0 \\ \alpha_1 & \alpha_2 & \alpha_0 & 1 \end{array} \right).$$

The block exchangeable correlation structure is also used for cohort parallel arms CRTs ([Preisser et al., 2003](#)) and cluster randomized crossover trials ([Li et al., 2019](#)).

## Web Appendix B

### Proof of Theorem 2.1

*Proof.* Eigenvalues help check the positive definiteness of the matrix. To do so, we first establish the following lemma, the proof of which is directly by Theorem 8.9.1 in [Graybill \(1983\)](#).

**Lemma 1.** *For a matrix  $S = a\mathbf{I}_{KL} + b\mathbf{I}_K \otimes \mathbf{J}_L + c\mathbf{J}_{KL}$ , the determinant is*

$$\begin{aligned} \det(S) &= \det[\mathbf{I}_K \otimes \{a\mathbf{I}_L + (b+c)\mathbf{J}_L - c\mathbf{J}_L\} + \mathbf{J}_K \otimes (c\mathbf{J}_L)] \\ &= \{\det(a\mathbf{I}_L + b\mathbf{J}_L)\}^{K-1} \times \det\{a\mathbf{I}_L + (b+Kc)\mathbf{J}_L\} \\ &= \{a^{L-1}(a+Lb)\}^{K-1} \times a^{L-1}\{a+L(b+Kc)\}. \end{aligned}$$

For the extended nested exchangeable correlation structure, to determine the eigenvalues, we need to solve

$$\begin{aligned} 0 &= \det(\mathbf{R}_i - \lambda\mathbf{I}_{MKL}) \\ &= \det\{(1 - \alpha_0 - \lambda)\mathbf{I}_{MKL} + (\alpha_0 - \alpha_1)\mathbf{I}_{MK} \otimes \mathbf{J}_L + (\alpha_1 - \alpha_2)\mathbf{I}_M \otimes \mathbf{J}_{KL} + \alpha_2\mathbf{J}_{MKL}\} \\ &= |A - B|^{M-1}|A + (M-1)B|, \end{aligned}$$

where

$$A - B = (1 - \alpha_0 - \lambda)\mathbf{I}_{KL} + (\alpha_0 - \alpha_1)\mathbf{I}_K \otimes \mathbf{J}_L + (\alpha_1 - \alpha_2)\mathbf{J}_{KL},$$

$$A + (M-1)B = (1 - \alpha_0 - \lambda)\mathbf{I}_{KL} + (\alpha_0 - \alpha_1)\mathbf{I}_K \otimes \mathbf{J}_L + (\alpha_1 + (M-1)\alpha_2)\mathbf{J}_{KL},$$

both of whose determinant can be calculated using the above Lemma 1 we established. Then

$$\begin{aligned} |A - B| &= [(1 - \alpha_0 - \lambda)^{L-1}\{(1 - \alpha_0 - \lambda) + L(\alpha_0 - \alpha_1)\}]^{K-1} \\ &\quad \times (1 - \alpha_0 - \lambda)^{L-1}[(1 - \alpha_0 - \lambda) + L\{(\alpha_0 - \alpha_1) + K(\alpha_1 - \alpha_2)\}], \end{aligned}$$

$$|A + (M - 1)B| = [(1 - \alpha_0 - \lambda)^{L-1} \{(1 - \alpha_0 - \lambda) + L(\alpha_0 - \alpha_1)\}]^{K-1} \\ \times (1 - \alpha_0 - \lambda)^{L-1} [(1 - \alpha_0 - \lambda) + L\{(\alpha_0 - \alpha_1) + K(\alpha_1 + (M - 1)\alpha_2)\}].$$

These two expressions allow us to establish the eigenvalues in closed forms. The eigenvalues are

$$\lambda_1 = 1 - \alpha_0 \quad \text{with multiplicity } MK(L - 1),$$

$$\lambda_2 = 1 + (L - 1)\alpha_0 - L\alpha_1 \quad \text{with multiplicity } M(K - 1),$$

$$\lambda_3 = 1 + (L - 1)\alpha_0 + L(K - 1)\alpha_1 - LK\alpha_2 \quad \text{with multiplicity } M - 1,$$

$$\lambda_4 = 1 + (L - 1)\alpha_0 + L(K - 1)\alpha_1 + LK(M - 1)\alpha_2 \quad \text{with multiplicity } 1.$$

The sum of multiplicity is exactly  $MKL$ , and the result is established.  $\square$

## Web Appendix C

### Derivation of BC1

Define the cluster leverage (Lu et al., 2007) as  $\mathbf{H}_i = \mathbf{D}_i(N\boldsymbol{\Sigma}_1)^{-1}\mathbf{D}_i'\mathbf{V}_i^{-1}$ . Setting  $\mathbf{C}_i = \mathbf{I}_p$  and  $\mathbf{B}_i = (\mathbf{I}_{MKL} - \mathbf{H}_i)^{-1/2}$  provides the finite-sample bias correction of Kauermann and Carroll (2001), or BC1. Scott et al. (2017) proved  $\mathbf{D}_i'\mathbf{V}_i^{-1}(\mathbf{I}_{MKL} - \mathbf{H}_i)^{-1/2} = (\mathbf{I}_p - \mathbf{Q}_i)^{-1/2}\mathbf{D}_i'\mathbf{V}_i^{-1}$ . So equivalently, setting  $\mathbf{C}_i = (\mathbf{I}_p - \mathbf{Q}_i)^{-1/2}$  and  $\mathbf{B}_i = \mathbf{I}_{MKL}$  provides BC1.

### Derivation of BC2

Setting  $\mathbf{C}_i = \mathbf{I}_p$  and  $\mathbf{B}_i = (\mathbf{I}_{MKL} - \mathbf{H}_i)^{-1}$  provides the finite-sample bias correction of Mancl and DeRouen (2001), or BC2. Scott et al. (2017) proved  $\mathbf{D}_i'\mathbf{V}_i^{-1}(\mathbf{I}_{MKL} - \mathbf{H}_i)^{-1} = (\mathbf{I}_p - \mathbf{Q}_i)^{-1}\mathbf{D}_i'\mathbf{V}_i^{-1}$ . So equivalently, setting  $\mathbf{C}_i = (\mathbf{I}_p - \mathbf{Q}_i)^{-1}$  and  $\mathbf{B}_i = \mathbf{I}_{MKL}$  provides BC2.

## Web Appendix D

### Derivation of $\mathbf{R}_i^{-1}$

For notational convenience, we write

$$\mathbf{R}_i = a\mathbf{I}_{MK} \otimes \mathbf{I}_L + b\mathbf{I}_{MK} \otimes \mathbf{J}_L + c\mathbf{I}_M \otimes \mathbf{J}_{KL} + d\mathbf{J}_M \otimes \mathbf{J}_{KL},$$

with  $a, b, c, d$  as functions of  $\boldsymbol{\alpha} = (\alpha_0, \alpha_1, \alpha_2)$  given above. Assume  $\mathbf{R}_i$  is invertible, so the coefficients of basis matrices will only take values such that  $\min\{\lambda_1, \lambda_2, \lambda_3, \lambda_3\} > 0$ . To derive an expression for the inverse, first show that  $\mathbf{R}_i^{-1}$  can be expanded by the same set of basis matrices used in constructing  $\mathbf{R}_i$ . By matrix inverse result (Henderson and Searle, 1981),

$$(\mathbf{A} + \mathbf{B})^{-1} = \mathbf{A}^{-1} - \mathbf{A}^{-1}\mathbf{B}(\mathbf{I} + \mathbf{A}^{-1}\mathbf{B})^{-1}\mathbf{A}^{-1}; \quad (\text{A1})$$

by Theorem 8.3.4 and 8.4.4 in Graybill (1983),

$$(x\mathbf{I}_u + y\mathbf{J}_u)^{-1} = \frac{1}{x}\mathbf{I}_u - \frac{y}{x(x+uy)}\mathbf{J}_u. \quad (\text{A2})$$

Observe that  $\mathbf{R}_i = \mathbf{I}_{MK} \otimes \mathbf{S}_L + \mathbf{T}_M \otimes \mathbf{J}_{KL}$ , where both  $\mathbf{S}_L = a\mathbf{I}_L + b\mathbf{J}_L$  and  $\mathbf{T}_M = c\mathbf{I}_M + d\mathbf{J}_M$  are of the exchangeable form. It follows from (A2) that  $\mathbf{S}_L^{-1} = e\mathbf{I}_L + f\mathbf{J}_L$  is also of the exchangeable form for some  $e, f$  (and same holds for  $\mathbf{T}_M^{-1}$ ). By (A1), the inverse of  $\mathbf{R}_i$  is

$$\mathbf{R}_i^{-1} = (\mathbf{I}_{MK} \otimes \mathbf{S}_L^{-1}) - \underbrace{(\mathbf{I}_{MK} \otimes \mathbf{S}_L^{-1})(\mathbf{T}_M \otimes \mathbf{J}_{KL})\{\mathbf{I}_{MKL} + (\mathbf{I}_{MK} \otimes \mathbf{S}_L^{-1})(\mathbf{T}_M \otimes \mathbf{J}_{KL})\}^{-1}(\mathbf{I}_{MK} \otimes \mathbf{S}_L^{-1})}_{\mathbf{G}_{MKL}}.$$

Further  $\mathbf{I}_{MK} \otimes \mathbf{S}_L^{-1} = \mathbf{I}_{MK} \otimes (e\mathbf{I}_L + f\mathbf{J}_L) = e\mathbf{I}_{MK} \otimes \mathbf{I}_L + f\mathbf{I}_{MK} \otimes \mathbf{J}_L$ , and  $\mathbf{T}_M \otimes \mathbf{J}_{KL} = (c\mathbf{I}_M + d\mathbf{J}_M) \otimes \mathbf{J}_{KL} = c\mathbf{I}_M \otimes \mathbf{J}_{KL} + d\mathbf{J}_M \otimes \mathbf{J}_{KL}$ . Thus we have

$$\mathbf{I}_{MKL} + (\mathbf{I}_{MK} \otimes \mathbf{S}_L^{-1})(\mathbf{T}_M \otimes \mathbf{J}_{KL}) = \mathbf{I}_{MKL} + (e\mathbf{I}_{MK} \otimes \mathbf{I}_L + f\mathbf{I}_{MK} \otimes \mathbf{J}_L)(c\mathbf{I}_M \otimes \mathbf{J}_{KL} + d\mathbf{J}_M \otimes \mathbf{J}_{KL})$$

$$\begin{aligned}
&= \mathbf{I}_{MKL} + (ec + fcL)\mathbf{I}_M \otimes \mathbf{J}_{KL} + (ed + fdL)\mathbf{J}_M \otimes \mathbf{J}_{KL} \\
&= \mathbf{I}_M \otimes \{\mathbf{I}_{KL} + (ec + fcL)\mathbf{J}_{KL}\} + (ed + fdL)\mathbf{J}_{MKL},
\end{aligned}$$

whose inverse is  $\mathbf{I}_{MKL} + p\mathbf{I}_M \otimes \mathbf{J}_{KL} + q\mathbf{J}_M \otimes \mathbf{J}_{KL}$  for some  $p, q$  by using (A1) and (A2) (i.e. treating  $\mathbf{I}_M \otimes \{\mathbf{I}_{KL} + (ec + fcL)\mathbf{J}_{KL}\}$  as  $\mathbf{A}$  and  $(ed + fdL)\mathbf{J}_{KL}$  as  $\mathbf{B}$ ; then  $\mathbf{A}^{-1}$  is derived from (A2) and plugged into the right hand side of (A1)). Therefore,  $\mathbf{G}_{MKL}$  must be of the form  $r\mathbf{I}_M \otimes \mathbf{J}_{KL} + s\mathbf{J}_M \otimes \mathbf{J}_{KL}$ , from which we conclude

$$\mathbf{R}_i^{-1} = \tilde{a}\mathbf{I}_{MK} \otimes \mathbf{I}_L + \tilde{b}\mathbf{I}_{MK} \otimes \mathbf{J}_L + \tilde{c}\mathbf{I}_M \otimes \mathbf{J}_{KL} + \tilde{d}\mathbf{J}_M \otimes \mathbf{J}_{KL},$$

for some coefficients  $\tilde{a}, \tilde{b}, \tilde{c}, \tilde{d}$ . Then solve the full-rank system of equations from  $\mathbf{R}_i^{-1}\mathbf{R}_i = \mathbf{I}_{MKL}$  to obtain the coefficients, we have  $\tilde{a} = 1/a$ ,  $\tilde{b} = -b/\{a(a + Lb)\}$ ,  $\tilde{c} = -c/\{(a + Lb)(a + Lb + KLe)\}$  and  $\tilde{d} = -d/\{(a + Lb + KLe)(a + Lb + KLe + MKLd)\}$ . Substituting  $a, b, c, d$  with functions of the correlation parameters  $\boldsymbol{\alpha}$ , we obtain a closed-form matrix inverse

$$\mathbf{R}_i^{-1} = \frac{1}{\lambda_1}\mathbf{I}_{MKL} - \frac{\alpha_0 - \alpha_1}{\lambda_1\lambda_2}\mathbf{I}_{MK} \otimes \mathbf{J}_L - \frac{\alpha_1 - \alpha_2}{\lambda_2\lambda_3}\mathbf{I}_M \otimes \mathbf{J}_{KL} - \frac{\alpha_2}{\lambda_3\lambda_4}\mathbf{J}_{MKL}. \quad (\text{A3})$$

The significance of the closed-form expression (A3) is in the computational savings arising from not having to invert  $\mathbf{R}_i$ , which would otherwise be costly for large  $MKL$ .

## Web Appendix E

### Derivation of $\pi_c^{\text{opt}}$

The optimal randomization proportion that leads to the smallest  $\sigma_\beta^2$  solves

$$\begin{aligned}
\frac{\partial \sigma_\beta^2}{\partial \pi_c} &= -\frac{\rho_c^2}{\pi_c^2} + \frac{\rho_t^2}{(1 - \pi_c)^2} = 0, \\
\Rightarrow -\rho_c^2(1 - \pi_c)^2 + \rho_t^2\pi_c^2 &= 0,
\end{aligned}$$

$$\Rightarrow (\rho_t^2 - \rho_c^2)\pi_c^2 + 2\rho_c^2\pi_c - \rho_c^2 = 0,$$

because  $\partial^2\sigma_\beta^2/\partial\pi_c = 2\rho_c^2/\pi_c^3 + 2\rho_t^2/(1-\pi_c)^3 \geq 0$  for any  $\pi_c$  within the unit interval.

If  $\rho_c = \rho_t$ , we have  $2\pi_c - 1 = 0$ , resulting in  $\pi_c^{\text{opt}} = 1/2$ .

Otherwise, the above quadratic function results in  $\pi_c^{\text{opt}} = (\rho_c^2 \pm |\rho_c\rho_t|)/(\rho_c^2 - \rho_t^2)$ , depending on which value is contained within the unit interval.

## Web Appendix F

### Proof of Theorem 3.7

*Proof.* (1) Randomization at level three

Suppose for each of  $N$  clusters,  $M$  health facilities are randomized with  $\pi_c M$  health facilities assigned to the control arm and  $(1 - \pi_c)M$  health facilities to the intervention arm. Furthermore, assume there is no interaction effect, i.e., the intervention effect is the same in every cluster. In this case,  $\mathbf{X}_i = \left( \mathbf{1}_{MKL}, (\mathbf{0}'_{\pi_c MKL}, \mathbf{1}'_{(1-\pi_c)MKL})' \right)$  for all  $i$ .

Using the model-based variance,

$$\begin{aligned} \boldsymbol{\Sigma}_1 &= N^{-1} \sum_{i=1}^N \mathbf{D}'_i \mathbf{V}_i^{-1} \mathbf{D}_i = \begin{pmatrix} \rho_c^{-2}\gamma_1 + 2\rho_c^{-1}\rho_t^{-1}\gamma_2 + \rho_t^{-2}\gamma_3 & \rho_c^{-1}\rho_t^{-1}\gamma_2 + \rho_t^{-2}\gamma_3 \\ \rho_c^{-1}\rho_t^{-1}\gamma_2 + \rho_t^{-2}\gamma_3 & \rho_t^{-2}\gamma_3 \end{pmatrix}, \\ \boldsymbol{\Sigma}_1^{-1} &= \frac{\rho_c^2\rho_t^2}{\gamma_1\gamma_3 - \gamma_2^2} \begin{pmatrix} \rho_t^{-2}\gamma_3 & -(\rho_c^{-1}\rho_t^{-1}\gamma_2 + \rho_t^{-2}\gamma_3) \\ -(\rho_c^{-1}\rho_t^{-1}\gamma_2 + \rho_t^{-2}\gamma_3) & \rho_c^{-2}\gamma_1 + 2\rho_c^{-1}\rho_t^{-1}\gamma_2 + \rho_t^{-2}\gamma_3 \end{pmatrix}, \end{aligned}$$

where  $\gamma_1$  is the sum of elements in first  $\pi_c MKL$  rows and first  $\pi_c MKL$  columns of  $\mathbf{R}^{-1}$ ,  $\gamma_2$  is the sum of elements in first  $\pi_c MKL$  rows and last  $(1 - \pi_c)MKL$  columns of  $\mathbf{R}^{-1}$ , and  $\gamma_3$  is the sum of elements in last  $(1 - \pi_c)MKL$  rows and last  $(1 - \pi_c)MKL$  columns of  $\mathbf{R}^{-1}$ . For our extended

nested exchangeable correlation structure,

$$\begin{aligned}\gamma_1 &= MKL \left\{ \frac{\pi_c^2}{\lambda_4} + \frac{\pi_c(1-\pi_c)}{\lambda_3} \right\}, \\ \gamma_2 &= MKL \left\{ \frac{\pi_c(1-\pi_c)}{\lambda_4} - \frac{\pi_c(1-\pi_c)}{\lambda_3} \right\}, \\ \gamma_3 &= MKL \left\{ \frac{(1-\pi_c)^2}{\lambda_4} + \frac{\pi_c(1-\pi_c)}{\lambda_3} \right\}.\end{aligned}$$

Then we have

$$\sigma_\beta^2 = \frac{\lambda_3}{MKL} \left( \frac{\rho_c^2}{\pi_c} + \frac{\rho_t^2}{1-\pi_c} \right) + \frac{(\lambda_4 - \lambda_3)(\rho_c - \rho_t)^2}{MKL}.$$

(2) Randomization at level two

Suppose for each of  $NM$  health facilities,  $K$  providers are randomized with  $\pi_c K$  providers assigned to the control arm and  $(1 - \pi_c)K$  providers to the intervention arm. Furthermore, assume there is no interaction effect, i.e., the intervention effect is the same in every health facility. In this case,  $\mathbf{X}_i = \mathbf{1}_M \otimes \mathbf{X}_{hf}$  for all  $i$ , where  $\mathbf{X}_{hf} = \left( \mathbf{1}_{KL}, (\mathbf{0}'_{\pi_c KL}, \mathbf{1}'_{(1-\pi_c)KL})' \right)$ .

Using the model-based variance,

$$\begin{aligned}\Sigma_1 &= N^{-1} \sum_{i=1}^N \mathbf{D}'_i \mathbf{V}_i^{-1} \mathbf{D}_i = \begin{pmatrix} \rho_c^{-2} \eta_1 + 2\rho_c^{-1} \rho_t^{-1} \eta_2 + \rho_t^{-2} \eta_3 & \rho_c^{-1} \rho_t^{-1} \eta_2 + \rho_t^{-2} \eta_3 \\ \rho_c^{-1} \rho_t^{-1} \eta_2 + \rho_t^{-2} \eta_3 & \rho_t^{-2} \eta_3 \end{pmatrix}, \\ \Sigma_1^{-1} &= \frac{\rho_c^2 \rho_t^2}{\eta_1 \eta_3 - \eta_2^2} \begin{pmatrix} \rho_t^{-2} \eta_3 & -(\rho_c^{-1} \rho_t^{-1} \eta_2 + \rho_t^{-2} \eta_3) \\ -(\rho_c^{-1} \rho_t^{-1} \eta_2 + \rho_t^{-2} \eta_3) & \rho_c^{-2} \eta_1 + 2\rho_c^{-1} \rho_t^{-1} \eta_2 + \rho_t^{-2} \eta_3 \end{pmatrix},\end{aligned}$$

where  $\eta_1$  is the sum of elements in control rows and control columns of  $\mathbf{R}^{-1}$ ,  $\eta_2$  is the sum of elements in control rows and intervention columns of  $\mathbf{R}^{-1}$ , and  $\eta_3$  is the sum of elements in intervention rows and intervention columns of  $\mathbf{R}^{-1}$ . For our extended nested exchangeable correlation structure,

$$\eta_1 = MKL \left\{ \frac{\pi_c^2}{\lambda_4} + \frac{\pi_c(1-\pi_c)}{\lambda_2} \right\},$$



$$\begin{aligned}\eta_2 &= MKL \left\{ \frac{\pi_c(1-\pi_c)}{\lambda_4} - \frac{\pi_c(1-\pi_c)}{\lambda_2} \right\}, \\ \eta_3 &= MKL \left\{ \frac{(1-\pi_c)^2}{\lambda_4} + \frac{\pi_c(1-\pi_c)}{\lambda_2} \right\}.\end{aligned}$$

Then we have

$$\sigma_\beta^2 = \frac{\lambda_2}{MKL} \left( \frac{\rho_c^2}{\pi_c} + \frac{\rho_t^2}{1-\pi_c} \right) + \frac{(\lambda_4 - \lambda_2)(\rho_c - \rho_t)^2}{MKL}.$$

(3) Randomization at level one

Suppose for each of  $NMK$  providers,  $L$  patients are randomized with  $\pi_c L$  patients assigned to the control arm and  $(1-\pi_c)L$  patients to the intervention arm. Furthermore, assume there is no interaction effect, i.e., the intervention effect is the same in every provider. In this case,  $\mathbf{X}_i = \mathbf{1}_{MK} \otimes \mathbf{X}_{pro}$  for all  $i$ , where  $\mathbf{X}_{pro} = (\mathbf{1}_L, (\mathbf{0}'_{\pi_c L}, \mathbf{1}'_{(1-\pi_c)L})')$ .

Using the model-based variance,

$$\begin{aligned}\Sigma_1 &= N^{-1} \sum_{i=1}^N \mathbf{D}_i' \mathbf{V}_i^{-1} \mathbf{D}_i = \begin{pmatrix} \rho_c^{-2}\theta_1 + 2\rho_c^{-1}\rho_t^{-1}\theta_2 + \rho_t^{-2}\theta_3 & \rho_c^{-1}\rho_t^{-1}\theta_2 + \rho_t^{-2}\theta_3 \\ \rho_c^{-1}\rho_t^{-1}\theta_2 + \rho_t^{-2}\theta_3 & \rho_t^{-2}\theta_3 \end{pmatrix}, \\ \Sigma_1^{-1} &= \frac{\rho_c^2 \rho_t^2}{\theta_1 \theta_3 - \theta_2^2} \begin{pmatrix} \rho_t^{-2}\theta_3 & -(\rho_c^{-1}\rho_t^{-1}\theta_2 + \rho_t^{-2}\theta_3) \\ -(\rho_c^{-1}\rho_t^{-1}\theta_2 + \rho_t^{-2}\theta_3) & \rho_c^{-2}\theta_1 + 2\rho_c^{-1}\rho_t^{-1}\theta_2 + \rho_t^{-2}\theta_3 \end{pmatrix},\end{aligned}$$

where  $\theta_1$  is the sum of elements in control rows and control columns of  $\mathbf{R}^{-1}$ ,  $\theta_2$  is the sum of elements in control rows and intervention columns of  $\mathbf{R}^{-1}$ , and  $\theta_3$  is the sum of elements in intervention rows and intervention columns of  $\mathbf{R}^{-1}$ . For our extended nested exchangeable correlation structure,

$$\begin{aligned}\theta_1 &= MKL \left\{ \frac{\pi_c^2}{\lambda_4} + \frac{\pi_c(1-\pi_c)}{\lambda_1} \right\}, \\ \theta_2 &= MKL \left\{ \frac{\pi_c(1-\pi_c)}{\lambda_4} - \frac{\pi_c(1-\pi_c)}{\lambda_1} \right\}, \\ \theta_3 &= MKL \left\{ \frac{(1-\pi_c)^2}{\lambda_4} + \frac{\pi_c(1-\pi_c)}{\lambda_1} \right\}.\end{aligned}$$

Then we have

$$\sigma_{\beta}^2 = \frac{\lambda_1}{MKL} \left( \frac{\rho_c^2}{\pi_c} + \frac{\rho_t^2}{1 - \pi_c} \right) + \frac{(\lambda_4 - \lambda_1)(\rho_c - \rho_t)^2}{MKL}.$$

□

## Web Appendix G

### Specific sample size formulas for randomization at lower levels

(1) Randomization at level three

When  $Y_{ijkl}$  is continuous, similar to Example 3.4, the required number of clusters must satisfy

$$N \geq \frac{(t_{\alpha/2, N-2} + t_{\gamma, N-2})^2}{b^2} \times \frac{\phi \lambda_3}{\pi_c(1 - \pi_c)MKL}.$$

When  $Y_{ijkl}$  is binary, similar to Example 3.5, under the canonical logit link function, the required number of clusters must satisfy

$$N \geq \frac{(t_{\alpha/2, N-2} + t_{\gamma, N-2})^2}{b^2} \times \left\{ \frac{\lambda_3}{MKL} \left( \frac{1}{\pi_c P_0 (1 - P_0)} + \frac{1}{(1 - \pi_c) P_1 (1 - P_1)} \right) + \frac{\lambda_4 - \lambda_3}{MKL} \left( \frac{1}{\sqrt{P_0 (1 - P_0)}} - \frac{1}{\sqrt{P_1 (1 - P_1)}} \right)^2 \right\};$$

under the identity link function, the required number of clusters must satisfy

$$N \geq \frac{(t_{\alpha/2, N-2} + t_{\gamma, N-2})^2}{b^2} \times \left\{ \frac{\lambda_3}{MKL} \left( \frac{P_0 (1 - P_0)}{\pi_c} + \frac{P_1 (1 - P_1)}{1 - \pi_c} \right) + \frac{\lambda_4 - \lambda_3}{MKL} \left( \sqrt{P_0 (1 - P_0)} - \sqrt{P_1 (1 - P_1)} \right)^2 \right\};$$

under the log link function, the required number of clusters must satisfy

$$N \geq \frac{(t_{\alpha/2, N-2} + t_{\gamma, N-2})^2}{b^2} \times \left\{ \frac{\lambda_3}{MKL} \left( \frac{1 - P_0}{\pi_c P_0} + \frac{1 - P_1}{(1 - \pi_c) P_1} \right) + \frac{\lambda_4 - \lambda_3}{MKL} \left( \sqrt{\frac{1 - P_0}{P_0}} - \sqrt{\frac{1 - P_1}{P_1}} \right)^2 \right\}.$$

When  $Y_{ijkl}$  is a count outcome, similar to Example 3.6, the required number of clusters must satisfy

$$N \geq \frac{(t_{\alpha/2, N-2} + t_{\gamma, N-2})^2}{b^2} \times \left\{ \frac{\lambda_3}{MKL} \left( \frac{1}{\pi_c \exp(\beta_1)} + \frac{1}{(1 - \pi_c) \exp(\beta_1 + \beta_2)} \right) + \frac{\lambda_4 - \lambda_3}{MKL} \left( \frac{1}{\sqrt{\exp(\beta_1)}} - \frac{1}{\sqrt{\exp(\beta_1 + \beta_2)}} \right)^2 \right\}.$$

(2) Randomization at level two

When  $Y_{ijkl}$  is continuous, similar to Example 3.4, the required number of clusters must satisfy

$$N \geq \frac{(t_{\alpha/2, N-2} + t_{\gamma, N-2})^2}{b^2} \times \frac{\phi \lambda_2}{\pi_c (1 - \pi_c) MKL}.$$

When  $Y_{ijkl}$  is binary, similar to Example 3.5, under the canonical logit link function, the required number of clusters must satisfy

$$N \geq \frac{(t_{\alpha/2, N-2} + t_{\gamma, N-2})^2}{b^2} \times \left\{ \frac{\lambda_2}{MKL} \left( \frac{1}{\pi_c P_0 (1 - P_0)} + \frac{1}{(1 - \pi_c) P_1 (1 - P_1)} \right) + \frac{\lambda_4 - \lambda_2}{MKL} \left( \frac{1}{\sqrt{P_0 (1 - P_0)}} - \frac{1}{\sqrt{P_1 (1 - P_1)}} \right)^2 \right\};$$

under the identity link function, the required number of clusters must satisfy

$$N \geq \frac{(t_{\alpha/2, N-2} + t_{\gamma, N-2})^2}{b^2} \times \left\{ \frac{\lambda_2}{MKL} \left( \frac{P_0 (1 - P_0)}{\pi_c} + \frac{P_1 (1 - P_1)}{1 - \pi_c} \right) + \frac{\lambda_4 - \lambda_2}{MKL} \left( \sqrt{P_0 (1 - P_0)} - \sqrt{P_1 (1 - P_1)} \right)^2 \right\};$$

under the log link function, the required number of clusters must satisfy

$$N \geq \frac{(t_{\alpha/2, N-2} + t_{\gamma, N-2})^2}{b^2} \times \left\{ \frac{\lambda_2}{MKL} \left( \frac{1 - P_0}{\pi_c P_0} + \frac{1 - P_1}{(1 - \pi_c) P_1} \right) + \frac{\lambda_4 - \lambda_2}{MKL} \left( \sqrt{\frac{1 - P_0}{P_0}} - \sqrt{\frac{1 - P_1}{P_1}} \right)^2 \right\}.$$

When  $Y_{ijkl}$  is a count outcome, similar to Example 3.6, the required number of clusters must satisfy

$$N \geq \frac{(t_{\alpha/2, N-2} + t_{\gamma, N-2})^2}{b^2} \times \left\{ \frac{\lambda_2}{MKL} \left( \frac{1}{\pi_c \exp(\beta_1)} + \frac{1}{(1 - \pi_c) \exp(\beta_1 + \beta_2)} \right) + \frac{\lambda_4 - \lambda_2}{MKL} \left( \frac{1}{\sqrt{\exp(\beta_1)}} - \frac{1}{\sqrt{\exp(\beta_1 + \beta_2)}} \right)^2 \right\}.$$

(3) Randomization at level one

When  $Y_{ijkl}$  is continuous, similar to Example 3.4, the required number of clusters must satisfy

$$N \geq \frac{(t_{\alpha/2, N-2} + t_{\gamma, N-2})^2}{b^2} \times \frac{\phi \lambda_1}{\pi_c (1 - \pi_c) MKL}.$$

When  $Y_{ijkl}$  is binary, similar to Example 3.5, under the canonical logit link function, the required number of clusters must satisfy

$$N \geq \frac{(t_{\alpha/2, N-2} + t_{\gamma, N-2})^2}{b^2} \times \left\{ \frac{\lambda_1}{MKL} \left( \frac{1}{\pi_c P_0 (1 - P_0)} + \frac{1}{(1 - \pi_c) P_1 (1 - P_1)} \right) + \frac{\lambda_4 - \lambda_1}{MKL} \left( \frac{1}{\sqrt{P_0 (1 - P_0)}} - \frac{1}{\sqrt{P_1 (1 - P_1)}} \right)^2 \right\};$$

under the identity link function, the required number of clusters must satisfy

$$N \geq \frac{(t_{\alpha/2, N-2} + t_{\gamma, N-2})^2}{b^2} \times \left\{ \frac{\lambda_1}{MKL} \left( \frac{P_0 (1 - P_0)}{\pi_c} + \frac{P_1 (1 - P_1)}{1 - \pi_c} \right) + \frac{\lambda_4 - \lambda_1}{MKL} \left( \sqrt{P_0 (1 - P_0)} - \sqrt{P_1 (1 - P_1)} \right)^2 \right\};$$

under the log link function, the required number of clusters must satisfy

$$N \geq \frac{(t_{\alpha/2, N-2} + t_{\gamma, N-2})^2}{b^2} \times \left\{ \frac{\lambda_1}{MKL} \left( \frac{1 - P_0}{\pi_c P_0} + \frac{1 - P_1}{(1 - \pi_c) P_1} \right) + \frac{\lambda_4 - \lambda_1}{MKL} \left( \sqrt{\frac{1 - P_0}{P_0}} - \sqrt{\frac{1 - P_1}{P_1}} \right)^2 \right\}.$$

When  $Y_{ijkl}$  is a count outcome, similar to Example 3.6, the required number of clusters must satisfy

$$N \geq \frac{(t_{\alpha/2, N-2} + t_{\gamma, N-2})^2}{b^2} \times \left\{ \frac{\lambda_1}{MKL} \left( \frac{1}{\pi_c \exp(\beta_1)} + \frac{1}{(1 - \pi_c) \exp(\beta_1 + \beta_2)} \right) + \frac{\lambda_4 - \lambda_1}{MKL} \left( \frac{1}{\sqrt{\exp(\beta_1)}} - \frac{1}{\sqrt{\exp(\beta_1 + \beta_2)}} \right)^2 \right\}.$$

## Web Appendix H

### Proof of Theorem 3.10

*Proof.* Denote  $\epsilon_{ijkl} = y_{ijkl} - \mu_{ijkl}(\boldsymbol{\beta})$ ,  $T_0$  as the control arm, and  $T_1$  as the intervention arm.

(1) Randomization at level four

We have

$$\begin{aligned} \hat{\boldsymbol{\Sigma}}_1 &= N^{-1} \sum_{i=1}^N \mathbf{D}'_i(\hat{\boldsymbol{\beta}}) \mathbf{V}_i^{-1} \mathbf{D}_i(\hat{\boldsymbol{\beta}}) \\ &= N^{-1} \sum_{i=1}^N \mathbf{D}'_i(\boldsymbol{\beta}) \mathbf{V}_i^{-1} \mathbf{D}_i(\boldsymbol{\beta}) + o_p(1) \\ &= (\mathbf{1}' \mathbf{I}^{-1} \mathbf{1}) \begin{pmatrix} \pi_c \rho_c^{-2} + (1 - \pi_c) \rho_t^{-2} & (1 - \pi_c) \rho_t^{-2} \\ (1 - \pi_c) \rho_t^{-2} & (1 - \pi_c) \rho_t^{-2} \end{pmatrix} + o_p(1). \end{aligned}$$

Thus as  $N \rightarrow \infty$ ,  $\hat{\Sigma}_1$  converges to

$$\Sigma_1 = MKL \begin{pmatrix} \pi_c \rho_c^{-2} + (1 - \pi_c) \rho_t^{-2} & (1 - \pi_c) \rho_t^{-2} \\ (1 - \pi_c) \rho_t^{-2} & (1 - \pi_c) \rho_t^{-2} \end{pmatrix}.$$

Also,

$$\begin{aligned} \hat{\Sigma}_0 &= N^{-1} \sum_{i=1}^N \left\{ \sum_{j=1}^M \sum_{k=1}^K \sum_{l=1}^L \frac{\hat{\epsilon}_{ijkl}}{\hat{\mu}_{ijkl}^2 \hat{\kappa}_{ijkl}^2 g'(\hat{\mu}_{ijkl})} \mathbf{X}_{ijkl} \right\}^{\otimes 2} \\ &= N^{-1} \sum_{i=1}^N \left\{ \sum_{j=1}^M \sum_{k=1}^K \sum_{l=1}^L \frac{\epsilon_{ijkl}}{\mu_{ijkl}^2 \kappa_{ijkl}^2 g'(\mu_{ijkl})} \mathbf{X}_{ijkl} \right\}^{\otimes 2} + o_p(1) \\ &= \pi_c \omega_c^{-2} (\pi_c N)^{-1} \sum_{i \in T_0} \left\{ \sum_{j=1}^M \sum_{k=1}^K \sum_{l=1}^L \epsilon_{ijkl} \begin{pmatrix} 1 \\ 0 \end{pmatrix} \right\}^{\otimes 2} \\ &\quad + (1 - \pi_c) \omega_t^{-2} [(1 - \pi_c) N]^{-1} \sum_{i \in T_1} \left\{ \sum_{j=1}^M \sum_{k=1}^K \sum_{l=1}^L \epsilon_{ijkl} \begin{pmatrix} 1 \\ 1 \end{pmatrix} \right\}^{\otimes 2} + o_p(1), \end{aligned}$$

where  $c^{\otimes 2} = cc'$  for a vector  $c$ ,  $\omega_c = \mu_c^2 \kappa_c^2 \{\partial g(\mu_c) / \partial \mu_c\}$ , and  $\omega_t = \mu_t^2 \kappa_t^2 \{\partial g(\mu_t) / \partial \mu_t\}$ .

For  $i \in T_0$ , we have

$$\begin{aligned} \mathbb{E}\left\{\left(\sum_{j=1}^M \sum_{k=1}^K \sum_{l=1}^L \epsilon_{ijkl}\right)^2\right\} &= \mu_c^2 \kappa_c^2 MKL \{1 + (L - 1)\alpha_0 + (K - 1)L\alpha_1 + (M - 1)KL\alpha_2\} \\ &= \mu_c^2 \kappa_c^2 MKL \lambda_4. \end{aligned}$$

For  $i \in T_1$ , we have

$$\begin{aligned} \mathbb{E}\left\{\left(\sum_{j=1}^M \sum_{k=1}^K \sum_{l=1}^L \epsilon_{ijkl}\right)^2\right\} &= \mu_t^2 \kappa_t^2 MKL \{1 + (L - 1)\alpha_0 + (K - 1)L\alpha_1 + (M - 1)KL\alpha_2\} \\ &= \mu_t^2 \kappa_t^2 MKL \lambda_4. \end{aligned}$$

By the central limit theorem, as  $N \rightarrow \infty$ ,  $\hat{\Sigma}_0$  converges to

$$\Sigma_0 = MKL\lambda_4 \begin{pmatrix} \pi_c\rho_c^{-2} + (1 - \pi_c)\rho_t^{-2} & (1 - \pi_c)\rho_t^{-2} \\ (1 - \pi_c)\rho_t^{-2} & (1 - \pi_c)\rho_t^{-2} \end{pmatrix}.$$

As  $N \rightarrow \infty$ ,  $\mathbf{V}_I^{\text{sandwich}} = \hat{\Sigma}_1^{-1}\hat{\Sigma}_0\hat{\Sigma}_1^{-1} \rightarrow \Sigma^* = \Sigma_1^{-1}\Sigma_0\Sigma_1^{-1}$ , and a few steps of algebra show that the (2,2)th element of  $\Sigma^*$  has a closed form

$$\sigma_{\beta^*}^2 = \frac{\lambda_4}{MKL} \left( \frac{\rho_c^2}{\pi_c} + \frac{\rho_t^2}{1 - \pi_c} \right).$$

(2) Randomization at level three

We have

$$\begin{aligned} \hat{\Sigma}_1 &= N^{-1} \sum_{i=1}^N \mathbf{D}'_i(\hat{\beta}) \mathbf{V}_i^{-1} \mathbf{D}_i(\hat{\beta}) \\ &= N^{-1} \sum_{i=1}^N \mathbf{D}'_i(\beta) \mathbf{V}_i^{-1} \mathbf{D}_i(\beta) + o_p(1) \\ &= \begin{pmatrix} \pi_c MKL\rho_c^{-2} + (1 - \pi_c)MKL\rho_t^{-2} & (1 - \pi_c)MKL\rho_t^{-2} \\ (1 - \pi_c)MKL\rho_t^{-2} & (1 - \pi_c)MKL\rho_t^{-2} \end{pmatrix} + o_p(1). \end{aligned}$$

Thus as  $N \rightarrow \infty$ ,  $\hat{\Sigma}_1$  converges to

$$\Sigma_1 = MKL \begin{pmatrix} \pi_c\rho_c^{-2} + (1 - \pi_c)\rho_t^{-2} & (1 - \pi_c)\rho_t^{-2} \\ (1 - \pi_c)\rho_t^{-2} & (1 - \pi_c)\rho_t^{-2} \end{pmatrix}.$$

Also,

$$\hat{\Sigma}_0 = N^{-1} \sum_{i=1}^N \left\{ \sum_{j=1}^M \sum_{k=1}^K \sum_{l=1}^L \frac{\hat{\epsilon}_{ijkl}}{\hat{\mu}_{ijkl}^2 \hat{\kappa}_{ijkl}^2 g'(\hat{\mu}_{ijkl})} \mathbf{X}_{ijkl} \right\}^{\otimes 2}$$

$$\begin{aligned}
&= N^{-1} \sum_{i=1}^N \left\{ \sum_{j=1}^M \sum_{k=1}^K \sum_{l=1}^L \frac{\epsilon_{ijkl}}{\mu_{ijkl}^2 \kappa_{ijkl}^2 g'(\mu_{ijkl})} \mathbf{X}_{ijkl} \right\}^{\otimes 2} + o_p(1) \\
&= N^{-1} \sum_{i=1}^N \left\{ \omega_c^{-1} \sum_{j \in T_0} \sum_{k=1}^K \sum_{l=1}^L \epsilon_{ijkl} \begin{pmatrix} 1 \\ 0 \end{pmatrix} + \omega_t^{-1} \sum_{j \in T_1} \sum_{k=1}^K \sum_{l=1}^L \epsilon_{ijkl} \begin{pmatrix} 1 \\ 1 \end{pmatrix} \right\}^{\otimes 2} + o_p(1) \\
&= N^{-1} \sum_{i=1}^N \begin{pmatrix} (\omega_c^{-1} \epsilon_{ic_3} + \omega_t^{-1} \epsilon_{it_3})^2 & (\omega_c^{-1} \epsilon_{ic_3} + \omega_t^{-1} \epsilon_{it_3})(\omega_t^{-1} \epsilon_{it_3}) \\ (\omega_c^{-1} \epsilon_{ic_3} + \omega_t^{-1} \epsilon_{it_3})(\omega_t^{-1} \epsilon_{it_3}) & (\omega_t^{-1} \epsilon_{it_3})^2 \end{pmatrix},
\end{aligned}$$

where  $\epsilon_{ic_3} = \sum_{j \in T_0} \sum_{k=1}^K \sum_{l=1}^L \epsilon_{ijkl}$ , and  $\epsilon_{it_3} = \sum_{j \in T_1} \sum_{k=1}^K \sum_{l=1}^L \epsilon_{ijkl}$ .

For all  $i$ , we have

$$\begin{aligned}
\mathbf{E}\{(\omega_c^{-1} \epsilon_{ic_3} + \omega_t^{-1} \epsilon_{it_3})^2\} &= \omega_c^{-2} \mu_c^2 \kappa_c^2 \gamma_4 + 2\omega_c^{-1} \mu_c \kappa_c \omega_t^{-1} \mu_t \kappa_t \gamma_5 + \omega_t^{-2} \mu_t^2 \kappa_t^2 \gamma_6 \\
&= \rho_c^{-2} \gamma_4 + 2\rho_c^{-1} \rho_t^{-1} \gamma_5 + \rho_t^{-2} \gamma_6, \\
\mathbf{E}\{(\omega_c^{-1} \epsilon_{ic_3} + \omega_t^{-1} \epsilon_{it_3})(\omega_t^{-1} \epsilon_{it_3})\} &= \rho_c^{-1} \rho_t^{-1} \gamma_5 + \rho_t^{-2} \gamma_6, \\
\mathbf{E}\{(\omega_t^{-1} \epsilon_{it_3})^2\} &= \rho_t^{-2} \gamma_6,
\end{aligned}$$

where  $\gamma_4$  is the sum of elements in first  $\pi_c MKL$  rows and first  $\pi_c MKL$  columns of  $\mathbf{R}$ ,  $\gamma_5$  is the sum of elements in first  $\pi_c MKL$  rows and last  $(1 - \pi_c)MKL$  columns of  $\mathbf{R}$ , and  $\gamma_6$  is the sum of elements in last  $(1 - \pi_c)MKL$  rows and last  $(1 - \pi_c)MKL$  columns of  $\mathbf{R}$ . For our extended nested exchangeable correlation structure,

$$\begin{aligned}
\gamma_4 &= (1 - \alpha_0) \pi_c MKL + (\alpha_0 - \alpha_1) \pi_c MKL^2 + (\alpha_1 - \alpha_2) \pi_c MK^2 L^2 + \alpha_2 (\pi_c M)^2 K^2 L^2 \\
&= MKL \{ \pi_c^2 \lambda_4 + \pi_c (1 - \pi_c) \lambda_3 \}, \\
\gamma_5 &= MKL \{ \pi_c (1 - \pi_c) \lambda_4 - \pi_c (1 - \pi_c) \lambda_3 \}, \\
\gamma_6 &= MKL \{ (1 - \pi_c)^2 \lambda_4 + \pi_c (1 - \pi_c) \lambda_3 \}.
\end{aligned}$$



By the central limit theorem, as  $N \rightarrow \infty$ ,  $\hat{\Sigma}_0$  converges to

$$\Sigma_0 = \begin{pmatrix} \rho_c^{-2}\gamma_4 + 2\rho_c^{-1}\rho_t^{-1}\gamma_5 + \rho_t^{-2}\gamma_6 & \rho_c^{-1}\rho_t^{-1}\gamma_5 + \rho_t^{-2}\gamma_6 \\ \rho_c^{-1}\rho_t^{-1}\gamma_5 + \rho_t^{-2}\gamma_6 & \rho_t^{-2}\gamma_6 \end{pmatrix}.$$

As  $N \rightarrow \infty$ ,  $\mathbf{V}_I^{\text{sandwich}} = \hat{\Sigma}_1^{-1}\hat{\Sigma}_0\hat{\Sigma}_1^{-1} \rightarrow \Sigma^* = \Sigma_1^{-1}\Sigma_0\Sigma_1^{-1}$ , and a few steps of algebra show that the (2,2)th element of  $\Sigma^*$  has a closed form

$$\sigma_{\beta^*}^2 = \frac{\lambda_3}{MKL} \left( \frac{\rho_c^2}{\pi_c} + \frac{\rho_t^2}{1 - \pi_c} \right) + \frac{(\lambda_4 - \lambda_3)(\rho_c - \rho_t)^2}{MKL}.$$

(3) Randomization at level two

Similar to the derivation in (2), we have

$$\Sigma_1 = MKL \begin{pmatrix} \pi_c\rho_c^{-2} + (1 - \pi_c)\rho_t^{-2} & (1 - \pi_c)\rho_t^{-2} \\ (1 - \pi_c)\rho_t^{-2} & (1 - \pi_c)\rho_t^{-2} \end{pmatrix},$$

$$\Sigma_0 = \begin{pmatrix} \rho_c^{-2}\eta_4 + 2\rho_c^{-1}\rho_t^{-1}\eta_5 + \rho_t^{-2}\eta_6 & \rho_c^{-1}\rho_t^{-1}\eta_5 + \rho_t^{-2}\eta_6 \\ \rho_c^{-1}\rho_t^{-1}\eta_5 + \rho_t^{-2}\eta_6 & \rho_t^{-2}\eta_6 \end{pmatrix},$$

where  $\eta_4$  is the sum of elements in control rows and control columns of  $\mathbf{R}$ ,  $\eta_5$  is the sum of elements in control rows and intervention columns of  $\mathbf{R}$ , and  $\eta_6$  is the sum of elements in intervention rows and intervention columns of  $\mathbf{R}$ , when the randomization takes place at the second level. For our extended nested exchangeable correlation structure,

$$\eta_4 = MKL \{ \pi_c^2\lambda_4 + \pi_c(1 - \pi_c)\lambda_2 \},$$

$$\eta_5 = MKL \{ \pi_c(1 - \pi_c)\lambda_4 - \pi_c(1 - \pi_c)\lambda_2 \},$$

$$\eta_6 = MKL \{ (1 - \pi_c)^2\lambda_4 + \pi_c(1 - \pi_c)\lambda_2 \}.$$

As  $N \rightarrow \infty$ ,  $\mathbf{V}_I^{\text{sandwich}} = \hat{\Sigma}_1^{-1}\hat{\Sigma}_0\hat{\Sigma}_1^{-1} \rightarrow \Sigma^* = \Sigma_1^{-1}\Sigma_0\Sigma_1^{-1}$ , and a few steps of algebra show that

the (2,2)th element of  $\Sigma^*$  has a closed form

$$\sigma_{\beta^*}^2 = \frac{\lambda_2}{MKL} \left( \frac{\rho_c^2}{\pi_c} + \frac{\rho_t^2}{1 - \pi_c} \right) + \frac{(\lambda_4 - \lambda_2)(\rho_c - \rho_t)^2}{MKL}.$$

(4) Randomization at level one

Similar to the derivation in (2), we have

$$\Sigma_1 = MKL \begin{pmatrix} \pi_c \rho_c^{-2} + (1 - \pi_c) \rho_t^{-2} & (1 - \pi_c) \rho_t^{-2} \\ (1 - \pi_c) \rho_t^{-2} & (1 - \pi_c) \rho_t^{-2} \end{pmatrix},$$

$$\Sigma_0 = \begin{pmatrix} \rho_c^{-2} \theta_4 + 2\rho_c^{-1} \rho_t^{-1} \theta_5 + \rho_t^{-2} \theta_6 & \rho_c^{-1} \rho_t^{-1} \theta_5 + \rho_t^{-2} \theta_6 \\ \rho_c^{-1} \rho_t^{-1} \theta_5 + \rho_t^{-2} \theta_6 & \rho_t^{-2} \theta_6 \end{pmatrix},$$

where  $\theta_4$  is the sum of elements in control rows and control columns of  $\mathbf{R}$ ,  $\theta_5$  is the sum of elements in control rows and intervention columns of  $\mathbf{R}$ , and  $\theta_6$  is the sum of elements in intervention rows and intervention columns of  $\mathbf{R}$ , when the randomization takes place at the first level. For our extended nested exchangeable correlation structure,

$$\theta_4 = MKL \{ \pi_c^2 \lambda_4 + \pi_c (1 - \pi_c) \lambda_1 \},$$

$$\theta_5 = MKL \{ \pi_c (1 - \pi_c) \lambda_4 - \pi_c (1 - \pi_c) \lambda_1 \},$$

$$\theta_6 = MKL \{ (1 - \pi_c)^2 \lambda_4 + \pi_c (1 - \pi_c) \lambda_1 \}.$$

As  $N \rightarrow \infty$ ,  $\mathbf{V}_I^{\text{sandwich}} = \hat{\Sigma}_1^{-1} \hat{\Sigma}_0 \hat{\Sigma}_1^{-1} \rightarrow \Sigma^* = \Sigma_1^{-1} \Sigma_0 \Sigma_1^{-1}$ , and a few steps of algebra show that the (2,2)th element of  $\Sigma^*$  has a closed form

$$\sigma_{\beta^*}^2 = \frac{\lambda_1}{MKL} \left( \frac{\rho_c^2}{\pi_c} + \frac{\rho_t^2}{1 - \pi_c} \right) + \frac{(\lambda_4 - \lambda_1)(\rho_c - \rho_t)^2}{MKL}.$$

□

## Web Appendix I

### Proof of Remark 4.1

*Proof.* Under balanced designs, the sum of each column of  $\mathbf{R}^{-1}$  is same, denoted as  $h$ , where  $h = (\mathbf{1}'\mathbf{R}^{-1}\mathbf{1})/(MKL)$ . When the randomization is carried out at the 4th level, we have

$$\begin{aligned}
\sum_{i=1}^N \mathbf{D}'_i \mathbf{V}_i^{-1} (\mathbf{Y}_i - \boldsymbol{\mu}_i) &= \sum_{i \in T_0} \mathbf{D}'_i \mathbf{V}_i^{-1} \boldsymbol{\epsilon}_i + \sum_{i \in T_1} \mathbf{D}'_i \mathbf{V}_i^{-1} \boldsymbol{\epsilon}_i \\
&= \omega_c^{-1} \mathbf{X}'_c \mathbf{R}^{-1} \sum_{i \in T_0} \boldsymbol{\epsilon}_i + \omega_t^{-1} \mathbf{X}'_t \mathbf{R}^{-1} \sum_{i \in T_1} \boldsymbol{\epsilon}_i \\
&= h \omega_c^{-1} \left( \sum_{i \in T_0} \mathbf{1}' \boldsymbol{\epsilon}_i \right) \begin{pmatrix} 1 \\ 0 \end{pmatrix} + h \omega_t^{-1} \left( \sum_{i \in T_1} \mathbf{1}' \boldsymbol{\epsilon}_i \right) \begin{pmatrix} 1 \\ 1 \end{pmatrix} \\
&= h \begin{pmatrix} \omega_c^{-1} \sum_{i \in T_0} \mathbf{1}' \boldsymbol{\epsilon}_i + \omega_t^{-1} \sum_{i \in T_1} \mathbf{1}' \boldsymbol{\epsilon}_i \\ \omega_t^{-1} \sum_{i \in T_1} \mathbf{1}' \boldsymbol{\epsilon}_i \end{pmatrix}.
\end{aligned}$$

Thus solving the  $\boldsymbol{\beta}$ -estimating equations  $\sum_{i=1}^N \mathbf{D}'_i \mathbf{V}_i^{-1} (\mathbf{Y}_i - \boldsymbol{\mu}_i) = \mathbf{0}$  is independent of  $h$ , or independent of the correlation matrix. That is, GEE analysis using the extended nested exchangeable working correlation matrix or using an independence working correlation matrix result in the same estimator  $\hat{\boldsymbol{\beta}}$ .

For  $i \in T_0$ , we have

$$\begin{aligned}
\mathbf{Q}_i &= \mathbf{D}'_i \mathbf{V}_i^{-1} \mathbf{D}_i (N \boldsymbol{\Sigma}_1)^{-1} \\
&= \rho_c^{-2} (\mathbf{1}' \mathbf{R}^{-1} \mathbf{1}) \begin{pmatrix} 1 & 0 \\ 0 & 0 \end{pmatrix} \frac{1}{N (\mathbf{1}' \mathbf{R}^{-1} \mathbf{1}) \pi_c \rho_c^{-2} (1 - \pi_c) \rho_t^{-2}} \begin{pmatrix} (1 - \pi_c) \rho_t^{-2} & -(1 - \pi_c) \rho_t^{-2} \\ -(1 - \pi_c) \rho_t^{-2} & \pi_c \rho_c^{-2} + (1 - \pi_c) \rho_t^{-2} \end{pmatrix} \\
&= \frac{1}{\pi_c N} \begin{pmatrix} 1 & -1 \\ 0 & 0 \end{pmatrix}.
\end{aligned}$$

For  $i \in T_1$ , we have

$$\begin{aligned}
\mathbf{Q}_i &= \mathbf{D}'_i \mathbf{V}_i^{-1} \mathbf{D}_i (N \boldsymbol{\Sigma}_1)^{-1} \\
&= \rho_t^{-2} (\mathbf{1}' \mathbf{R}^{-1} \mathbf{1}) \begin{pmatrix} 1 & 1 \\ 1 & 1 \end{pmatrix} \frac{1}{N (\mathbf{1}' \mathbf{R}^{-1} \mathbf{1}) \pi_c \rho_c^{-2} (1 - \pi_c) \rho_t^{-2}} \begin{pmatrix} (1 - \pi_c) \rho_t^{-2} & -(1 - \pi_c) \rho_t^{-2} \\ -(1 - \pi_c) \rho_t^{-2} & \pi_c \rho_c^{-2} + (1 - \pi_c) \rho_t^{-2} \end{pmatrix} \\
&= \frac{1}{(1 - \pi_c) N} \begin{pmatrix} 0 & 1 \\ 0 & 1 \end{pmatrix}.
\end{aligned}$$

Thus  $\mathbf{Q}_i$  is independent of the correlation matrix. That is, GEE analysis using the extended nested exchangeable working correlation matrix or using an independence working correlation matrix result in the same  $\mathbf{C}_i$  for BC0, BC1, BC2, and BC3, respectively.

In addition,

$$\begin{aligned}
\boldsymbol{\Sigma}_1^{-1} &= \frac{1}{(\mathbf{1}' \mathbf{R}^{-1} \mathbf{1}) \pi_c \rho_c^{-2} (1 - \pi_c) \rho_t^{-2}} \begin{pmatrix} (1 - \pi_c) \rho_t^{-2} & -(1 - \pi_c) \rho_t^{-2} \\ -(1 - \pi_c) \rho_t^{-2} & \pi_c \rho_c^{-2} + (1 - \pi_c) \rho_t^{-2} \end{pmatrix}, \\
\boldsymbol{\Sigma}_0 &= \frac{1}{N} \left[ \sum_{i \in T_0} \left\{ \mathbf{C}_i h \omega_c^{-1} (\mathbf{1}' \hat{\boldsymbol{\epsilon}}_i) \begin{pmatrix} 1 \\ 0 \end{pmatrix} \right\}^{\otimes 2} + \sum_{i \in T_1} \left\{ \mathbf{C}_i h \omega_t^{-1} (\mathbf{1}' \hat{\boldsymbol{\epsilon}}_i) \begin{pmatrix} 1 \\ 1 \end{pmatrix} \right\}^{\otimes 2} \right] \\
&= \frac{h^2}{N} \left[ \omega_c^{-2} \sum_{i \in T_0} \left\{ (\mathbf{1}' \hat{\boldsymbol{\epsilon}}_i) \mathbf{C}_i \begin{pmatrix} 1 \\ 0 \end{pmatrix} \right\}^{\otimes 2} + \omega_t^{-2} \sum_{i \in T_1} \left\{ (\mathbf{1}' \hat{\boldsymbol{\epsilon}}_i) \mathbf{C}_i \begin{pmatrix} 1 \\ 1 \end{pmatrix} \right\}^{\otimes 2} \right].
\end{aligned}$$

Denote

$$\begin{aligned}
\mathbf{T} &= \frac{1}{\pi_c \rho_c^{-2} (1 - \pi_c) \rho_t^{-2}} \begin{pmatrix} (1 - \pi_c) \rho_t^{-2} & -(1 - \pi_c) \rho_t^{-2} \\ -(1 - \pi_c) \rho_t^{-2} & \pi_c \rho_c^{-2} + (1 - \pi_c) \rho_t^{-2} \end{pmatrix}, \\
\mathbf{L} &= \frac{1}{N} \left[ \omega_c^{-2} \sum_{i \in T_0} \left\{ (\mathbf{1}' \hat{\boldsymbol{\epsilon}}_i) \mathbf{C}_i \begin{pmatrix} 1 \\ 0 \end{pmatrix} \right\}^{\otimes 2} + \omega_t^{-2} \sum_{i \in T_1} \left\{ (\mathbf{1}' \hat{\boldsymbol{\epsilon}}_i) \mathbf{C}_i \begin{pmatrix} 1 \\ 1 \end{pmatrix} \right\}^{\otimes 2} \right],
\end{aligned}$$

where  $\mathbf{T}$  and  $\mathbf{L}$  are both independent of the correlation matrix. Then

$$\begin{aligned}\mathbf{V}_R^{\text{sandwich}} &= \hat{\Sigma}_1^{-1} \hat{\Sigma}_0 \hat{\Sigma}_1^{-1} \\ &= \frac{1}{\mathbf{1}'\mathbf{R}^{-1}\mathbf{1}} \mathbf{T} \left( \frac{\mathbf{1}'\mathbf{R}^{-1}\mathbf{1}}{MKL} \right)^2 \mathbf{L} \frac{1}{\mathbf{1}'\mathbf{R}^{-1}\mathbf{1}} \mathbf{T} \\ &= \left( \frac{1}{MKL} \right)^2 \mathbf{T}\mathbf{L}\mathbf{T},\end{aligned}$$

which is independent of the correlation matrix. Therefore, GEE analysis using the extended nested exchangeable working correlation matrix or using an independence working correlation matrix result in the same estimators BC0, BC1, BC2, AVG, and BC3.  $\square$

## Web Appendix J: Web tables from simulation study

**Web Table 1:** Convergence rates (out of 1000) of GEE/MAEE analyses, using the extended nested exchangeable working correlation structure under balanced four-level CRTs.

| $P_0$ | $P_1$ | $\alpha^a$ | $n$ | $m$ | $k$ | $l$ | Convergence (Size) <sup>b</sup> | Convergence (Power) <sup>c</sup> |
|-------|-------|------------|-----|-----|-----|-----|---------------------------------|----------------------------------|
| 0.2   | 0.5   | A1         | 14  | 2   | 3   | 5   | 998                             | 1000                             |
| 0.2   | 0.5   | A1         | 14  | 2   | 3   | 10  | 1000                            | 999                              |
| 0.2   | 0.5   | A1         | 14  | 2   | 4   | 5   | 999                             | 1000                             |
| 0.2   | 0.5   | A1         | 12  | 3   | 3   | 5   | 1000                            | 1000                             |
| 0.2   | 0.5   | A2         | 10  | 2   | 3   | 5   | 1000                            | 994                              |
| 0.2   | 0.5   | A2         | 10  | 2   | 3   | 10  | 1000                            | 998                              |
| 0.2   | 0.5   | A2         | 10  | 2   | 4   | 5   | 998                             | 998                              |
| 0.2   | 0.5   | A2         | 8   | 3   | 3   | 5   | 954                             | 948                              |
| 0.2   | 0.5   | A3         | 8   | 2   | 3   | 5   | 922                             | 894                              |
| 0.2   | 0.5   | A3         | 8   | 3   | 3   | 5   | 911                             | 913                              |
| 0.2   | 0.5   | A4         | 8   | 3   | 3   | 5   | 944                             | 928                              |
| 0.1   | 0.3   | A1         | 22  | 2   | 3   | 5   | 983                             | 985                              |
| 0.1   | 0.3   | A1         | 20  | 2   | 3   | 10  | 990                             | 990                              |
| 0.1   | 0.3   | A1         | 20  | 2   | 4   | 5   | 995                             | 995                              |
| 0.1   | 0.3   | A1         | 16  | 3   | 3   | 5   | 1000                            | 999                              |
| 0.1   | 0.3   | A2         | 16  | 2   | 3   | 5   | 997                             | 995                              |
| 0.1   | 0.3   | A2         | 14  | 2   | 3   | 10  | 997                             | 995                              |
| 0.1   | 0.3   | A2         | 14  | 2   | 4   | 5   | 995                             | 994                              |
| 0.1   | 0.3   | A2         | 12  | 3   | 3   | 5   | 1000                            | 998                              |
| 0.1   | 0.3   | A3         | 12  | 2   | 3   | 5   | 991                             | 991                              |
| 0.1   | 0.3   | A3         | 10  | 3   | 3   | 5   | 992                             | 989                              |
| 0.1   | 0.3   | A4         | 10  | 3   | 3   | 5   | 993                             | 991                              |
| 0.5   | 0.7   | A1         | 26  | 2   | 4   | 5   | 1000                            | 1000                             |
| 0.5   | 0.7   | A2         | 16  | 3   | 3   | 5   | 1000                            | 1000                             |
| 0.5   | 0.7   | A3         | 12  | 2   | 4   | 5   | 998                             | 998                              |
| 0.5   | 0.7   | A4         | 14  | 3   | 3   | 5   | 999                             | 1000                             |
| 0.8   | 0.9   | A2         | 30  | 3   | 3   | 5   | 1000                            | 1000                             |
| 0.8   | 0.9   | A3         | 22  | 2   | 4   | 5   | 1000                            | 1000                             |
| 0.8   | 0.9   | A4         | 28  | 2   | 4   | 5   | 1000                            | 1000                             |
| 0.8   | 0.9   | A4         | 24  | 3   | 3   | 5   | 1000                            | 1000                             |

<sup>a</sup> A1:  $\alpha = (0.4, 0.1, 0.03)$ ; A2:  $\alpha = (0.15, 0.08, 0.02)$ ; A3:  $\alpha = (0.1, 0.02, 0.01)$ ; A4:  $\alpha = (0.05, 0.05, 0.02)$ .

<sup>b</sup> Convergence rates (out of 1000) in simulation scenarios for assessing the empirical type I error rate.

<sup>c</sup> Convergence rates (out of 1000) in simulation scenarios for assessing the empirical power.

**Web Table 2:** Simulation scenarios and empirical type I error rates<sup>a</sup> of GEE analyses based on different variance estimators, using an independence working correlation matrix under balanced four-level CRTs. MB: Model-based variance estimator; BC0: Uncorrected sandwich estimator of [Liang and Zeger \(1986\)](#); BC1: Bias-corrected sandwich estimator of [Kauermann and Carroll \(2001\)](#); BC2: Bias-corrected sandwich estimator of [Mancl and DeRouen \(2001\)](#); AVG: Bias-corrected sandwich estimator with standard error as the average of those from BC1 and BC2; BC3: Bias-corrected sandwich estimator of [Fay and Graubard \(2001\)](#); BC4: Bias-corrected sandwich estimator of [Morel et al. \(2003\)](#).

| $P_0$ | $P_1$ | $\alpha^b$ | $n$ | $m$ | $k$ | $l$ | MB           | BC0          | BC1          | BC2          | AVG          | BC3          | BC4          | CR <sup>c</sup> |
|-------|-------|------------|-----|-----|-----|-----|--------------|--------------|--------------|--------------|--------------|--------------|--------------|-----------------|
| 0.2   | 0.5   | A1         | 14  | 2   | 3   | 5   | 0.281        | 0.070        | <b>0.049</b> | <b>0.043</b> | <b>0.047</b> | <b>0.046</b> | <b>0.046</b> | 1000            |
| 0.2   | 0.5   | A1         | 14  | 2   | 3   | 10  | 0.427        | 0.078        | <b>0.056</b> | <b>0.041</b> | <b>0.047</b> | <b>0.049</b> | <b>0.046</b> | 1000            |
| 0.2   | 0.5   | A1         | 14  | 2   | 4   | 5   | 0.337        | 0.070        | <b>0.051</b> | <b>0.037</b> | <b>0.045</b> | <b>0.048</b> | <b>0.047</b> | 1000            |
| 0.2   | 0.5   | A1         | 12  | 3   | 3   | 5   | 0.310        | 0.070        | <b>0.049</b> | 0.033        | <b>0.042</b> | <b>0.038</b> | <b>0.042</b> | 1000            |
| 0.2   | 0.5   | A2         | 10  | 2   | 3   | 5   | 0.145        | <b>0.060</b> | <b>0.044</b> | 0.024        | 0.032        | 0.033        | 0.030        | 1000            |
| 0.2   | 0.5   | A2         | 10  | 2   | 3   | 10  | 0.293        | 0.077        | <b>0.054</b> | 0.032        | <b>0.041</b> | <b>0.040</b> | <b>0.039</b> | 1000            |
| 0.2   | 0.5   | A2         | 10  | 2   | 4   | 5   | 0.184        | 0.069        | <b>0.050</b> | 0.034        | <b>0.041</b> | <b>0.045</b> | <b>0.039</b> | 1000            |
| 0.2   | 0.5   | A2         | 8   | 3   | 3   | 5   | 0.148        | 0.074        | <b>0.041</b> | 0.024        | 0.033        | 0.034        | 0.030        | 1000            |
| 0.2   | 0.5   | A3         | 8   | 2   | 3   | 5   | <b>0.064</b> | <b>0.058</b> | <b>0.042</b> | 0.020        | 0.028        | 0.035        | 0.022        | 1000            |
| 0.2   | 0.5   | A3         | 8   | 3   | 3   | 5   | 0.071        | 0.076        | <b>0.041</b> | 0.024        | 0.031        | 0.035        | 0.025        | 1000            |
| 0.2   | 0.5   | A4         | 8   | 3   | 3   | 5   | 0.104        | 0.070        | <b>0.047</b> | 0.028        | <b>0.039</b> | <b>0.039</b> | 0.032        | 1000            |
| 0.1   | 0.3   | A1         | 22  | 2   | 3   | 5   | 0.334        | 0.074        | <b>0.059</b> | <b>0.051</b> | <b>0.052</b> | <b>0.054</b> | <b>0.051</b> | 999             |
| 0.1   | 0.3   | A1         | 20  | 2   | 3   | 10  | 0.458        | 0.084        | 0.072        | <b>0.051</b> | <b>0.061</b> | <b>0.063</b> | <b>0.057</b> | 1000            |
| 0.1   | 0.3   | A1         | 20  | 2   | 4   | 5   | 0.356        | 0.077        | <b>0.059</b> | <b>0.048</b> | <b>0.053</b> | <b>0.054</b> | <b>0.053</b> | 1000            |
| 0.1   | 0.3   | A1         | 16  | 3   | 3   | 5   | 0.329        | 0.073        | <b>0.050</b> | <b>0.036</b> | <b>0.043</b> | <b>0.040</b> | <b>0.042</b> | 1000            |
| 0.1   | 0.3   | A2         | 16  | 2   | 3   | 5   | 0.182        | 0.075        | <b>0.056</b> | <b>0.041</b> | <b>0.047</b> | <b>0.048</b> | <b>0.045</b> | 1000            |
| 0.1   | 0.3   | A2         | 14  | 2   | 3   | 10  | 0.308        | 0.073        | <b>0.059</b> | <b>0.041</b> | <b>0.050</b> | <b>0.045</b> | <b>0.047</b> | 1000            |
| 0.1   | 0.3   | A2         | 14  | 2   | 4   | 5   | 0.211        | 0.080        | <b>0.055</b> | <b>0.040</b> | <b>0.050</b> | <b>0.048</b> | <b>0.047</b> | 999             |
| 0.1   | 0.3   | A2         | 12  | 3   | 3   | 5   | 0.186        | 0.083        | <b>0.056</b> | <b>0.040</b> | <b>0.049</b> | <b>0.048</b> | <b>0.046</b> | 1000            |
| 0.1   | 0.3   | A3         | 12  | 2   | 3   | 5   | 0.086        | 0.076        | <b>0.063</b> | <b>0.048</b> | <b>0.055</b> | <b>0.053</b> | <b>0.050</b> | 1000            |
| 0.1   | 0.3   | A3         | 10  | 3   | 3   | 5   | 0.083        | <b>0.062</b> | <b>0.041</b> | 0.030        | 0.032        | 0.032        | 0.029        | 1000            |
| 0.1   | 0.3   | A4         | 10  | 3   | 3   | 5   | 0.114        | 0.067        | <b>0.043</b> | 0.026        | 0.035        | 0.033        | 0.030        | 1000            |
| 0.5   | 0.7   | A1         | 26  | 2   | 4   | 5   | 0.354        | 0.066        | <b>0.063</b> | <b>0.049</b> | <b>0.055</b> | <b>0.057</b> | <b>0.055</b> | 1000            |
| 0.5   | 0.7   | A2         | 16  | 3   | 3   | 5   | 0.228        | 0.065        | <b>0.057</b> | <b>0.041</b> | <b>0.049</b> | <b>0.049</b> | <b>0.049</b> | 1000            |
| 0.5   | 0.7   | A3         | 12  | 2   | 4   | 5   | 0.108        | 0.070        | <b>0.055</b> | <b>0.038</b> | <b>0.042</b> | <b>0.041</b> | <b>0.039</b> | 1000            |
| 0.5   | 0.7   | A4         | 14  | 3   | 3   | 5   | 0.154        | <b>0.061</b> | <b>0.039</b> | 0.033        | 0.035        | 0.035        | 0.035        | 1000            |
| 0.8   | 0.9   | A2         | 30  | 3   | 3   | 5   | 0.211        | <b>0.053</b> | <b>0.047</b> | <b>0.041</b> | <b>0.044</b> | <b>0.046</b> | <b>0.045</b> | 1000            |
| 0.8   | 0.9   | A3         | 22  | 2   | 4   | 5   | 0.139        | <b>0.056</b> | <b>0.047</b> | <b>0.037</b> | <b>0.039</b> | <b>0.039</b> | <b>0.040</b> | 1000            |
| 0.8   | 0.9   | A4         | 28  | 2   | 4   | 5   | 0.190        | <b>0.057</b> | <b>0.051</b> | <b>0.037</b> | <b>0.042</b> | <b>0.043</b> | <b>0.042</b> | 1000            |
| 0.8   | 0.9   | A4         | 24  | 3   | 3   | 5   | 0.179        | <b>0.056</b> | <b>0.049</b> | <b>0.041</b> | <b>0.046</b> | <b>0.046</b> | <b>0.047</b> | 1000            |

<sup>a</sup> Bold text indicates acceptable empirical type I error rate (from 3.6% to 6.4%).

<sup>b</sup> A1:  $\alpha = (0.4, 0.1, 0.03)$ ; A2:  $\alpha = (0.15, 0.08, 0.02)$ ; A3:  $\alpha = (0.1, 0.02, 0.01)$ ; A4:  $\alpha = (0.05, 0.05, 0.02)$ .

<sup>c</sup> CR: Convergence rate (out of 1000) for assessing the empirical type I error rate.

**Web Table 3:** Simulation scenarios, predicted power, and empirical power<sup>a</sup> of GEE analyses based on different variance estimators, using an independence working correlation matrix under balanced four-level CRTs. MB: Model-based variance estimator; BC0: Uncorrected sandwich estimator of [Liang and Zeger \(1986\)](#); BC1: Bias-corrected sandwich estimator of [Kauermann and Carroll \(2001\)](#); BC2: Bias-corrected sandwich estimator of [Mancl and DeRouen \(2001\)](#); AVG: Bias-corrected sandwich estimator with standard error as the average of those from BC1 and BC2; BC3: Bias-corrected sandwich estimator of [Fay and Graubard \(2001\)](#); BC4: Bias-corrected sandwich estimator of [Morel et al. \(2003\)](#).

| P <sub>0</sub> | P <sub>1</sub> | $\alpha^b$ | <i>n</i> | <i>m</i> | <i>k</i> | <i>l</i> | Pred <sup>c</sup> | MB    | BC0          | BC1          | BC2          | AVG          | BC3          | BC4          | CR <sup>d</sup> |
|----------------|----------------|------------|----------|----------|----------|----------|-------------------|-------|--------------|--------------|--------------|--------------|--------------|--------------|-----------------|
| 0.2            | 0.5            | A1         | 14       | 2        | 3        | 5        | 0.817             | 0.986 | 0.857        | <b>0.822</b> | 0.767        | <b>0.798</b> | <b>0.795</b> | <b>0.798</b> | 1000            |
| 0.2            | 0.5            | A1         | 14       | 2        | 3        | 10       | 0.845             | 0.994 | <b>0.876</b> | <b>0.833</b> | 0.790        | 0.811        | 0.806        | 0.813        | 1000            |
| 0.2            | 0.5            | A1         | 14       | 2        | 4        | 5        | 0.866             | 0.996 | 0.909        | <b>0.884</b> | <b>0.854</b> | <b>0.871</b> | <b>0.869</b> | <b>0.872</b> | 1000            |
| 0.2            | 0.5            | A1         | 12       | 3        | 3        | 5        | 0.857             | 0.994 | 0.891        | <b>0.851</b> | 0.793        | 0.824        | 0.821        | 0.827        | 1000            |
| 0.2            | 0.5            | A2         | 10       | 2        | 3        | 5        | 0.808             | 0.977 | 0.882        | <b>0.812</b> | 0.745        | <b>0.783</b> | 0.777        | <b>0.784</b> | 1000            |
| 0.2            | 0.5            | A2         | 10       | 2        | 3        | 10       | 0.870             | 0.996 | 0.907        | <b>0.863</b> | 0.792        | 0.829        | 0.827        | 0.834        | 1000            |
| 0.2            | 0.5            | A2         | 10       | 2        | 4        | 5        | 0.852             | 0.986 | 0.897        | <b>0.853</b> | 0.784        | 0.823        | 0.820        | <b>0.827</b> | 1000            |
| 0.2            | 0.5            | A2         | 8        | 3        | 3        | 5        | 0.800             | 0.983 | 0.896        | <b>0.826</b> | 0.716        | <b>0.779</b> | <b>0.778</b> | <b>0.787</b> | 1000            |
| 0.2            | 0.5            | A3         | 8        | 2        | 3        | 5        | 0.851             | 0.973 | 0.923        | <b>0.859</b> | 0.769        | 0.810        | 0.811        | 0.820        | 1000            |
| 0.2            | 0.5            | A3         | 8        | 3        | 3        | 5        | 0.936             | 0.999 | 0.983        | <b>0.954</b> | <b>0.912</b> | <b>0.933</b> | <b>0.936</b> | <b>0.937</b> | 1000            |
| 0.2            | 0.5            | A4         | 8        | 3        | 3        | 5        | 0.892             | 0.996 | 0.960        | <b>0.914</b> | 0.839        | <b>0.877</b> | <b>0.874</b> | <b>0.882</b> | 1000            |
| 0.1            | 0.3            | A1         | 22       | 2        | 3        | 5        | 0.829             | 0.991 | 0.879        | 0.856        | <b>0.831</b> | <b>0.845</b> | <b>0.840</b> | <b>0.844</b> | 999             |
| 0.1            | 0.3            | A1         | 20       | 2        | 3        | 10       | 0.818             | 0.994 | 0.866        | <b>0.843</b> | <b>0.815</b> | <b>0.832</b> | <b>0.829</b> | <b>0.832</b> | 1000            |
| 0.1            | 0.3            | A1         | 20       | 2        | 4        | 5        | 0.841             | 0.991 | 0.886        | <b>0.858</b> | <b>0.830</b> | <b>0.844</b> | <b>0.840</b> | <b>0.844</b> | 1000            |
| 0.1            | 0.3            | A1         | 16       | 3        | 3        | 5        | 0.805             | 0.983 | 0.851        | <b>0.817</b> | <b>0.783</b> | <b>0.804</b> | <b>0.803</b> | <b>0.806</b> | 1000            |
| 0.1            | 0.3            | A2         | 16       | 2        | 3        | 5        | 0.844             | 0.985 | 0.907        | 0.876        | <b>0.834</b> | <b>0.858</b> | <b>0.853</b> | <b>0.860</b> | 1000            |
| 0.1            | 0.3            | A2         | 14       | 2        | 3        | 10       | 0.849             | 0.998 | 0.895        | <b>0.855</b> | 0.808        | <b>0.828</b> | <b>0.827</b> | <b>0.831</b> | 1000            |
| 0.1            | 0.3            | A2         | 14       | 2        | 4        | 5        | 0.829             | 0.984 | 0.898        | 0.870        | <b>0.823</b> | <b>0.850</b> | <b>0.842</b> | <b>0.851</b> | 999             |
| 0.1            | 0.3            | A2         | 12       | 3        | 3        | 5        | 0.826             | 0.989 | 0.892        | <b>0.844</b> | 0.798        | <b>0.828</b> | <b>0.825</b> | <b>0.828</b> | 1000            |
| 0.1            | 0.3            | A3         | 12       | 2        | 3        | 5        | 0.873             | 0.978 | 0.931        | <b>0.893</b> | <b>0.855</b> | <b>0.878</b> | <b>0.875</b> | <b>0.878</b> | 1000            |
| 0.1            | 0.3            | A3         | 10       | 3        | 3        | 5        | 0.898             | 0.989 | 0.959        | <b>0.917</b> | <b>0.872</b> | <b>0.893</b> | <b>0.891</b> | <b>0.896</b> | 1000            |
| 0.1            | 0.3            | A4         | 10       | 3        | 3        | 5        | 0.837             | 0.986 | 0.919        | 0.878        | 0.800        | <b>0.840</b> | <b>0.830</b> | <b>0.845</b> | 1000            |
| 0.5            | 0.7            | A1         | 26       | 2        | 4        | 5        | 0.823             | 0.988 | 0.854        | <b>0.838</b> | <b>0.814</b> | <b>0.825</b> | <b>0.825</b> | <b>0.825</b> | 1000            |
| 0.5            | 0.7            | A2         | 16       | 3        | 3        | 5        | 0.831             | 0.976 | 0.864        | <b>0.831</b> | 0.789        | <b>0.810</b> | <b>0.813</b> | <b>0.811</b> | 1000            |
| 0.5            | 0.7            | A3         | 12       | 2        | 4        | 5        | 0.827             | 0.937 | 0.860        | <b>0.825</b> | 0.778        | 0.800        | <b>0.806</b> | 0.799        | 1000            |
| 0.5            | 0.7            | A4         | 14       | 3        | 3        | 5        | 0.868             | 0.974 | <b>0.894</b> | <b>0.861</b> | 0.814        | 0.835        | 0.835        | 0.835        | 1000            |
| 0.8            | 0.9            | A2         | 30       | 3        | 3        | 5        | 0.804             | 0.967 | 0.838        | <b>0.818</b> | <b>0.800</b> | <b>0.810</b> | <b>0.810</b> | <b>0.811</b> | 1000            |
| 0.8            | 0.9            | A3         | 22       | 2        | 4        | 5        | 0.804             | 0.938 | <b>0.829</b> | <b>0.810</b> | <b>0.788</b> | <b>0.801</b> | <b>0.805</b> | <b>0.803</b> | 1000            |
| 0.8            | 0.9            | A4         | 28       | 2        | 4        | 5        | 0.824             | 0.967 | <b>0.850</b> | <b>0.839</b> | <b>0.826</b> | <b>0.836</b> | <b>0.837</b> | <b>0.836</b> | 1000            |
| 0.8            | 0.9            | A4         | 24       | 3        | 3        | 5        | 0.813             | 0.957 | 0.847        | <b>0.823</b> | <b>0.799</b> | <b>0.810</b> | <b>0.811</b> | <b>0.812</b> | 1000            |

<sup>a</sup> Bold text indicates acceptable empirical power (differing at most 2.6% from the predicted power).

<sup>b</sup> A1:  $\alpha = (0.4, 0.1, 0.03)$ ; A2:  $\alpha = (0.15, 0.08, 0.02)$ ; A3:  $\alpha = (0.1, 0.02, 0.01)$ ; A4:  $\alpha = (0.05, 0.05, 0.02)$ .

<sup>c</sup> Pred: Predicted power based on *t*-test.

<sup>d</sup> CR: Convergence rate (out of 1000) for assessing the empirical power.



**Web Table 4:** Simulation scenarios and empirical type I error rates<sup>a</sup> of GEE/MAEE analyses based on different variance estimators, using the extended nested exchangeable working correlation structure under unbalanced four-level CRTs with CV = 0.25. MB: Model-based variance estimator; BC0: Uncorrected sandwich estimator of Liang and Zeger (1986); BC1: Bias-corrected sandwich estimator of Kauermann and Carroll (2001); BC2: Bias-corrected sandwich estimator of Mancl and DeRouen (2001); AVG: Bias-corrected sandwich estimator with standard error as the average of those from BC1 and BC2; BC3: Bias-corrected sandwich estimator of Fay and Graubard (2001); BC4: Bias-corrected sandwich estimator of Morel et al. (2003).

| P <sub>0</sub> | P <sub>1</sub> | $\alpha^b$ | <i>n</i> | <i>m</i> | <i>k</i> | <i>l</i> | MB           | BC0          | BC1          | BC2          | AVG          | BC3          | BC4          | CR <sup>c</sup> |
|----------------|----------------|------------|----------|----------|----------|----------|--------------|--------------|--------------|--------------|--------------|--------------|--------------|-----------------|
| 0.2            | 0.5            | A1         | 14       | 2        | 3        | 5        | <b>0.048</b> | 0.073        | <b>0.054</b> | <b>0.042</b> | <b>0.048</b> | <b>0.050</b> | <b>0.045</b> | 997             |
| 0.2            | 0.5            | A1         | 14       | 2        | 3        | 10       | <b>0.040</b> | 0.070        | <b>0.053</b> | 0.035        | <b>0.045</b> | <b>0.044</b> | <b>0.040</b> | 999             |
| 0.2            | 0.5            | A1         | 14       | 2        | 4        | 5        | <b>0.039</b> | 0.072        | <b>0.049</b> | 0.033        | <b>0.041</b> | <b>0.043</b> | <b>0.036</b> | 999             |
| 0.2            | 0.5            | A1         | 12       | 3        | 3        | 5        | <b>0.046</b> | 0.071        | <b>0.055</b> | <b>0.038</b> | <b>0.049</b> | <b>0.047</b> | <b>0.046</b> | 998             |
| 0.2            | 0.5            | A2         | 10       | 2        | 3        | 5        | <b>0.039</b> | 0.067        | <b>0.047</b> | 0.022        | 0.031        | 0.032        | 0.029        | 998             |
| 0.2            | 0.5            | A2         | 10       | 2        | 3        | 10       | <b>0.045</b> | 0.082        | <b>0.050</b> | <b>0.036</b> | <b>0.038</b> | <b>0.039</b> | <b>0.038</b> | 998             |
| 0.2            | 0.5            | A2         | 10       | 2        | 4        | 5        | <b>0.046</b> | 0.077        | <b>0.059</b> | 0.032        | <b>0.042</b> | <b>0.038</b> | <b>0.037</b> | 997             |
| 0.2            | 0.5            | A2         | 8        | 3        | 3        | 5        | 0.033        | 0.070        | <b>0.046</b> | 0.022        | 0.028        | 0.033        | 0.023        | 943             |
| 0.2            | 0.5            | A3         | 8        | 2        | 3        | 5        | 0.023        | <b>0.055</b> | 0.030        | 0.014        | 0.019        | 0.020        | 0.017        | 860             |
| 0.2            | 0.5            | A3         | 8        | 3        | 3        | 5        | 0.034        | <b>0.053</b> | 0.034        | 0.018        | 0.025        | 0.028        | 0.024        | 888             |
| 0.2            | 0.5            | A4         | 8        | 3        | 3        | 5        | 0.035        | 0.066        | 0.035        | 0.016        | 0.027        | 0.025        | 0.022        | 925             |
| 0.1            | 0.3            | A1         | 22       | 2        | 3        | 5        | 0.033        | <b>0.060</b> | <b>0.054</b> | <b>0.046</b> | <b>0.049</b> | <b>0.049</b> | <b>0.046</b> | 980             |
| 0.1            | 0.3            | A1         | 20       | 2        | 3        | 10       | <b>0.038</b> | 0.076        | <b>0.062</b> | <b>0.045</b> | <b>0.053</b> | <b>0.053</b> | <b>0.049</b> | 988             |
| 0.1            | 0.3            | A1         | 20       | 2        | 4        | 5        | 0.035        | 0.068        | <b>0.054</b> | <b>0.044</b> | <b>0.047</b> | <b>0.048</b> | <b>0.045</b> | 993             |
| 0.1            | 0.3            | A1         | 16       | 3        | 3        | 5        | <b>0.047</b> | 0.078        | <b>0.061</b> | <b>0.046</b> | <b>0.054</b> | <b>0.054</b> | <b>0.051</b> | 998             |
| 0.1            | 0.3            | A2         | 16       | 2        | 3        | 5        | <b>0.037</b> | <b>0.063</b> | <b>0.053</b> | <b>0.036</b> | <b>0.044</b> | <b>0.042</b> | <b>0.039</b> | 994             |
| 0.1            | 0.3            | A2         | 14       | 2        | 3        | 10       | <b>0.046</b> | 0.078        | 0.067        | <b>0.048</b> | <b>0.058</b> | <b>0.057</b> | <b>0.054</b> | 998             |
| 0.1            | 0.3            | A2         | 14       | 2        | 4        | 5        | <b>0.041</b> | 0.074        | <b>0.056</b> | <b>0.042</b> | <b>0.049</b> | <b>0.047</b> | <b>0.045</b> | 997             |
| 0.1            | 0.3            | A2         | 12       | 3        | 3        | 5        | <b>0.037</b> | 0.072        | <b>0.055</b> | 0.035        | <b>0.043</b> | <b>0.043</b> | <b>0.037</b> | 997             |
| 0.1            | 0.3            | A3         | 12       | 2        | 3        | 5        | <b>0.047</b> | 0.077        | <b>0.056</b> | <b>0.037</b> | <b>0.048</b> | <b>0.044</b> | <b>0.041</b> | 989             |
| 0.1            | 0.3            | A3         | 10       | 3        | 3        | 5        | <b>0.045</b> | 0.077        | <b>0.051</b> | 0.030        | <b>0.041</b> | <b>0.043</b> | <b>0.036</b> | 987             |
| 0.1            | 0.3            | A4         | 10       | 3        | 3        | 5        | <b>0.044</b> | 0.072        | <b>0.052</b> | <b>0.036</b> | <b>0.042</b> | <b>0.042</b> | <b>0.038</b> | 989             |
| 0.5            | 0.7            | A1         | 26       | 2        | 4        | 5        | <b>0.053</b> | <b>0.060</b> | <b>0.056</b> | <b>0.047</b> | <b>0.052</b> | <b>0.052</b> | <b>0.052</b> | 1000            |
| 0.5            | 0.7            | A2         | 16       | 3        | 3        | 5        | <b>0.053</b> | <b>0.064</b> | <b>0.050</b> | <b>0.037</b> | <b>0.042</b> | <b>0.041</b> | <b>0.042</b> | 1000            |
| 0.5            | 0.7            | A3         | 12       | 2        | 4        | 5        | <b>0.061</b> | 0.081        | <b>0.059</b> | <b>0.038</b> | <b>0.049</b> | <b>0.051</b> | <b>0.045</b> | 996             |
| 0.5            | 0.7            | A4         | 14       | 3        | 3        | 5        | <b>0.051</b> | 0.072        | <b>0.049</b> | <b>0.036</b> | <b>0.039</b> | <b>0.041</b> | <b>0.039</b> | 1000            |
| 0.8            | 0.9            | A2         | 30       | 3        | 3        | 5        | <b>0.048</b> | <b>0.053</b> | <b>0.051</b> | <b>0.043</b> | <b>0.048</b> | <b>0.048</b> | <b>0.048</b> | 1000            |
| 0.8            | 0.9            | A3         | 22       | 2        | 4        | 5        | <b>0.049</b> | <b>0.060</b> | <b>0.050</b> | <b>0.042</b> | <b>0.047</b> | <b>0.045</b> | <b>0.046</b> | 1000            |
| 0.8            | 0.9            | A4         | 28       | 2        | 4        | 5        | <b>0.039</b> | <b>0.043</b> | <b>0.040</b> | <b>0.038</b> | <b>0.040</b> | <b>0.040</b> | <b>0.040</b> | 1000            |
| 0.8            | 0.9            | A4         | 24       | 3        | 3        | 5        | <b>0.058</b> | 0.069        | 0.065        | <b>0.048</b> | <b>0.055</b> | <b>0.056</b> | <b>0.053</b> | 1000            |

<sup>a</sup> Bold text indicates acceptable empirical type I error rate (from 3.6% to 6.4%).

<sup>b</sup> A1:  $\alpha = (0.4, 0.1, 0.03)$ ; A2:  $\alpha = (0.15, 0.08, 0.02)$ ; A3:  $\alpha = (0.1, 0.02, 0.01)$ ; A4:  $\alpha = (0.05, 0.05, 0.02)$ .

<sup>c</sup> CR: Convergence rate (out of 1000) for assessing the empirical type I error rate.

**Web Table 5:** Simulation scenarios, predicted power, and empirical power<sup>a</sup> of GEE/MAEE analyses based on different variance estimators, using the extended nested exchangeable working correlation structure under unbalanced four-level CRTs with CV = 0.25. MB: Model-based variance estimator; BC0: Uncorrected sandwich estimator of [Liang and Zeger \(1986\)](#); BC1: Bias-corrected sandwich estimator of [Kauermann and Carroll \(2001\)](#); BC2: Bias-corrected sandwich estimator of [Mancl and DeRouen \(2001\)](#); AVG: Bias-corrected sandwich estimator with standard error as the average of those from BC1 and BC2; BC3: Bias-corrected sandwich estimator of [Fay and Graubard \(2001\)](#); BC4: Bias-corrected sandwich estimator of [Morel et al. \(2003\)](#).

| P <sub>0</sub> | P <sub>1</sub> | $\alpha^b$ | <i>n</i> | <i>m</i> | <i>k</i> | <i>l</i> | Pred <sup>c</sup> | MB           | BC0          | BC1          | BC2          | AVG          | BC3          | BC4          | CR <sup>d</sup> |
|----------------|----------------|------------|----------|----------|----------|----------|-------------------|--------------|--------------|--------------|--------------|--------------|--------------|--------------|-----------------|
| 0.2            | 0.5            | A1         | 14       | 2        | 3        | 5        | 0.817             | <b>0.805</b> | <b>0.841</b> | <b>0.798</b> | 0.761        | 0.773        | 0.778        | 0.774        | 997             |
| 0.2            | 0.5            | A1         | 14       | 2        | 3        | 10       | 0.845             | <b>0.855</b> | 0.891        | <b>0.858</b> | 0.812        | <b>0.835</b> | <b>0.832</b> | <b>0.827</b> | 1000            |
| 0.2            | 0.5            | A1         | 14       | 2        | 4        | 5        | 0.866             | <b>0.873</b> | 0.901        | <b>0.870</b> | 0.826        | <b>0.846</b> | <b>0.845</b> | <b>0.846</b> | 999             |
| 0.2            | 0.5            | A1         | 12       | 3        | 3        | 5        | 0.857             | <b>0.852</b> | 0.891        | <b>0.845</b> | 0.799        | 0.823        | 0.822        | 0.821        | 1000            |
| 0.2            | 0.5            | A2         | 10       | 2        | 3        | 5        | 0.808             | <b>0.834</b> | 0.880        | <b>0.826</b> | 0.754        | <b>0.794</b> | <b>0.793</b> | <b>0.789</b> | 985             |
| 0.2            | 0.5            | A2         | 10       | 2        | 3        | 10       | 0.870             | <b>0.885</b> | 0.925        | <b>0.880</b> | 0.816        | <b>0.849</b> | <b>0.850</b> | <b>0.845</b> | 996             |
| 0.2            | 0.5            | A2         | 10       | 2        | 4        | 5        | 0.852             | <b>0.877</b> | 0.925        | <b>0.869</b> | 0.810        | <b>0.844</b> | <b>0.840</b> | <b>0.839</b> | 995             |
| 0.2            | 0.5            | A2         | 8        | 3        | 3        | 5        | 0.800             | <b>0.807</b> | 0.876        | <b>0.800</b> | 0.691        | 0.750        | 0.746        | 0.742        | 920             |
| 0.2            | 0.5            | A3         | 8        | 2        | 3        | 5        | 0.851             | <b>0.844</b> | 0.912        | <b>0.855</b> | 0.732        | 0.791        | 0.785        | 0.777        | 867             |
| 0.2            | 0.5            | A3         | 8        | 3        | 3        | 5        | 0.936             | <b>0.945</b> | 0.971        | <b>0.944</b> | 0.894        | <b>0.922</b> | <b>0.919</b> | <b>0.913</b> | 877             |
| 0.2            | 0.5            | A4         | 8        | 3        | 3        | 5        | 0.892             | <b>0.911</b> | 0.951        | <b>0.910</b> | 0.830        | <b>0.873</b> | <b>0.873</b> | 0.862        | 932             |
| 0.1            | 0.3            | A1         | 22       | 2        | 3        | 5        | 0.829             | 0.859        | 0.878        | <b>0.852</b> | <b>0.827</b> | <b>0.839</b> | <b>0.838</b> | <b>0.839</b> | 985             |
| 0.1            | 0.3            | A1         | 20       | 2        | 3        | 10       | 0.818             | 0.859        | 0.877        | 0.849        | <b>0.827</b> | <b>0.836</b> | <b>0.834</b> | <b>0.836</b> | 985             |
| 0.1            | 0.3            | A1         | 20       | 2        | 4        | 5        | 0.841             | <b>0.857</b> | 0.879        | <b>0.848</b> | <b>0.817</b> | <b>0.834</b> | <b>0.831</b> | <b>0.835</b> | 991             |
| 0.1            | 0.3            | A1         | 16       | 3        | 3        | 5        | 0.805             | 0.837        | 0.870        | 0.835        | <b>0.799</b> | <b>0.817</b> | <b>0.814</b> | <b>0.816</b> | 992             |
| 0.1            | 0.3            | A2         | 16       | 2        | 3        | 5        | 0.844             | 0.880        | 0.894        | 0.871        | <b>0.841</b> | <b>0.854</b> | <b>0.852</b> | <b>0.852</b> | 993             |
| 0.1            | 0.3            | A2         | 14       | 2        | 3        | 10       | 0.849             | <b>0.874</b> | 0.901        | 0.876        | <b>0.834</b> | <b>0.857</b> | <b>0.853</b> | <b>0.853</b> | 998             |
| 0.1            | 0.3            | A2         | 14       | 2        | 4        | 5        | 0.829             | 0.858        | 0.880        | <b>0.843</b> | <b>0.806</b> | <b>0.825</b> | <b>0.824</b> | <b>0.825</b> | 996             |
| 0.1            | 0.3            | A2         | 12       | 3        | 3        | 5        | 0.826             | 0.867        | 0.901        | 0.860        | <b>0.802</b> | <b>0.828</b> | <b>0.829</b> | <b>0.828</b> | 996             |
| 0.1            | 0.3            | A3         | 12       | 2        | 3        | 5        | 0.873             | 0.910        | 0.934        | 0.906        | <b>0.856</b> | <b>0.884</b> | <b>0.879</b> | <b>0.884</b> | 989             |
| 0.1            | 0.3            | A3         | 10       | 3        | 3        | 5        | 0.898             | <b>0.921</b> | 0.953        | <b>0.920</b> | 0.871        | <b>0.902</b> | <b>0.895</b> | <b>0.892</b> | 972             |
| 0.1            | 0.3            | A4         | 10       | 3        | 3        | 5        | 0.837             | 0.873        | 0.914        | 0.865        | 0.810        | <b>0.839</b> | <b>0.840</b> | <b>0.837</b> | 977             |
| 0.5            | 0.7            | A1         | 26       | 2        | 4        | 5        | 0.823             | <b>0.832</b> | <b>0.849</b> | <b>0.834</b> | <b>0.809</b> | <b>0.823</b> | <b>0.823</b> | <b>0.822</b> | 1000            |
| 0.5            | 0.7            | A2         | 16       | 3        | 3        | 5        | 0.831             | <b>0.817</b> | <b>0.846</b> | <b>0.816</b> | 0.779        | 0.804        | 0.803        | 0.801        | 1000            |
| 0.5            | 0.7            | A3         | 12       | 2        | 4        | 5        | 0.827             | <b>0.834</b> | 0.880        | <b>0.827</b> | 0.784        | <b>0.807</b> | <b>0.809</b> | <b>0.803</b> | 996             |
| 0.5            | 0.7            | A4         | 14       | 3        | 3        | 5        | 0.868             | <b>0.877</b> | 0.905        | <b>0.870</b> | 0.831        | <b>0.852</b> | <b>0.851</b> | <b>0.850</b> | 1000            |
| 0.8            | 0.9            | A2         | 30       | 3        | 3        | 5        | 0.804             | <b>0.822</b> | 0.836        | <b>0.821</b> | <b>0.798</b> | <b>0.811</b> | <b>0.813</b> | <b>0.808</b> | 1000            |
| 0.8            | 0.9            | A3         | 22       | 2        | 4        | 5        | 0.804             | <b>0.804</b> | <b>0.830</b> | <b>0.800</b> | 0.773        | <b>0.784</b> | <b>0.788</b> | <b>0.783</b> | 999             |
| 0.8            | 0.9            | A4         | 28       | 2        | 4        | 5        | 0.824             | <b>0.832</b> | <b>0.846</b> | <b>0.827</b> | <b>0.801</b> | <b>0.815</b> | <b>0.816</b> | <b>0.812</b> | 998             |
| 0.8            | 0.9            | A4         | 24       | 3        | 3        | 5        | 0.813             | <b>0.812</b> | <b>0.832</b> | <b>0.807</b> | <b>0.790</b> | <b>0.801</b> | <b>0.803</b> | <b>0.800</b> | 999             |

<sup>a</sup> Bold text indicates acceptable empirical power (differing at most 2.6% from the predicted power).

<sup>b</sup> A1:  $\alpha = (0.4, 0.1, 0.03)$ ; A2:  $\alpha = (0.15, 0.08, 0.02)$ ; A3:  $\alpha = (0.1, 0.02, 0.01)$ ; A4:  $\alpha = (0.05, 0.05, 0.02)$ .

<sup>c</sup> Pred: Predicted power based on *t*-test.

<sup>d</sup> CR: Convergence rate (out of 1000) for assessing the empirical power.

**Web Table 6:** Simulation scenarios and empirical type I error rates<sup>a</sup> of GEE/MAEE analyses based on different variance estimators, using the extended nested exchangeable working correlation structure under unbalanced four-level CRTs with CV = 0.50. MB: Model-based variance estimator; BC0: Uncorrected sandwich estimator of [Liang and Zeger \(1986\)](#); BC1: Bias-corrected sandwich estimator of [Kauermann and Carroll \(2001\)](#); BC2: Bias-corrected sandwich estimator of [Mancl and DeRouen \(2001\)](#); AVG: Bias-corrected sandwich estimator with standard error as the average of those from BC1 and BC2; BC3: Bias-corrected sandwich estimator of [Fay and Graubard \(2001\)](#); BC4: Bias-corrected sandwich estimator of [Morel et al. \(2003\)](#).

| P <sub>0</sub> | P <sub>1</sub> | $\alpha^b$ | <i>n</i> | <i>m</i> | <i>k</i> | <i>l</i> | MB           | BC0          | BC1          | BC2          | AVG          | BC3          | BC4          | CR <sup>c</sup> |
|----------------|----------------|------------|----------|----------|----------|----------|--------------|--------------|--------------|--------------|--------------|--------------|--------------|-----------------|
| 0.2            | 0.5            | A1         | 14       | 2        | 3        | 5        | <b>0.047</b> | <b>0.064</b> | <b>0.050</b> | <b>0.037</b> | <b>0.043</b> | <b>0.039</b> | <b>0.039</b> | 996             |
| 0.2            | 0.5            | A1         | 14       | 2        | 3        | 10       | <b>0.053</b> | 0.085        | <b>0.060</b> | <b>0.047</b> | <b>0.050</b> | <b>0.051</b> | <b>0.049</b> | 1000            |
| 0.2            | 0.5            | A1         | 14       | 2        | 4        | 5        | <b>0.056</b> | 0.079        | <b>0.060</b> | <b>0.048</b> | <b>0.056</b> | <b>0.054</b> | <b>0.049</b> | 999             |
| 0.2            | 0.5            | A1         | 12       | 3        | 3        | 5        | <b>0.042</b> | 0.069        | <b>0.054</b> | 0.034        | <b>0.044</b> | <b>0.041</b> | <b>0.039</b> | 998             |
| 0.2            | 0.5            | A2         | 10       | 2        | 3        | 5        | <b>0.039</b> | 0.066        | <b>0.045</b> | 0.030        | <b>0.039</b> | <b>0.037</b> | <b>0.038</b> | 974             |
| 0.2            | 0.5            | A2         | 10       | 2        | 3        | 10       | <b>0.043</b> | 0.079        | <b>0.050</b> | 0.032        | <b>0.039</b> | <b>0.039</b> | <b>0.036</b> | 984             |
| 0.2            | 0.5            | A2         | 10       | 2        | 4        | 5        | <b>0.036</b> | 0.074        | <b>0.046</b> | 0.027        | 0.035        | 0.035        | 0.030        | 990             |
| 0.2            | 0.5            | A2         | 8        | 3        | 3        | 5        | 0.032        | 0.070        | <b>0.037</b> | 0.012        | 0.025        | 0.024        | 0.018        | 884             |
| 0.2            | 0.5            | A3         | 8        | 2        | 3        | 5        | 0.025        | <b>0.045</b> | 0.025        | 0.011        | 0.018        | 0.017        | 0.016        | 760             |
| 0.2            | 0.5            | A3         | 8        | 3        | 3        | 5        | 0.028        | <b>0.054</b> | 0.030        | 0.017        | 0.022        | 0.022        | 0.021        | 827             |
| 0.2            | 0.5            | A4         | 8        | 3        | 3        | 5        | 0.017        | <b>0.050</b> | 0.024        | 0.009        | 0.015        | 0.018        | 0.013        | 848             |
| 0.1            | 0.3            | A1         | 22       | 2        | 3        | 5        | <b>0.041</b> | <b>0.064</b> | <b>0.049</b> | <b>0.042</b> | <b>0.046</b> | <b>0.047</b> | <b>0.046</b> | 967             |
| 0.1            | 0.3            | A1         | 20       | 2        | 3        | 10       | <b>0.038</b> | 0.068        | <b>0.049</b> | <b>0.041</b> | <b>0.045</b> | <b>0.041</b> | <b>0.040</b> | 977             |
| 0.1            | 0.3            | A1         | 20       | 2        | 4        | 5        | 0.034        | <b>0.064</b> | <b>0.053</b> | <b>0.046</b> | <b>0.049</b> | <b>0.049</b> | <b>0.046</b> | 989             |
| 0.1            | 0.3            | A1         | 16       | 3        | 3        | 5        | <b>0.036</b> | 0.069        | <b>0.056</b> | <b>0.043</b> | <b>0.045</b> | <b>0.045</b> | <b>0.043</b> | 988             |
| 0.1            | 0.3            | A2         | 16       | 2        | 3        | 5        | <b>0.037</b> | 0.065        | <b>0.053</b> | <b>0.037</b> | <b>0.048</b> | <b>0.046</b> | <b>0.044</b> | 988             |
| 0.1            | 0.3            | A2         | 14       | 2        | 3        | 10       | 0.034        | 0.069        | <b>0.050</b> | <b>0.038</b> | <b>0.040</b> | <b>0.039</b> | <b>0.039</b> | 985             |
| 0.1            | 0.3            | A2         | 14       | 2        | 4        | 5        | 0.034        | 0.072        | <b>0.052</b> | <b>0.044</b> | <b>0.047</b> | <b>0.043</b> | <b>0.043</b> | 992             |
| 0.1            | 0.3            | A2         | 12       | 3        | 3        | 5        | <b>0.051</b> | 0.075        | <b>0.055</b> | <b>0.040</b> | <b>0.049</b> | <b>0.045</b> | <b>0.045</b> | 993             |
| 0.1            | 0.3            | A3         | 12       | 2        | 3        | 5        | <b>0.049</b> | 0.072        | <b>0.056</b> | <b>0.038</b> | <b>0.048</b> | <b>0.047</b> | <b>0.044</b> | 963             |
| 0.1            | 0.3            | A3         | 10       | 3        | 3        | 5        | <b>0.041</b> | 0.067        | <b>0.056</b> | <b>0.037</b> | <b>0.042</b> | <b>0.040</b> | <b>0.037</b> | 956             |
| 0.1            | 0.3            | A4         | 10       | 3        | 3        | 5        | <b>0.041</b> | 0.080        | <b>0.052</b> | 0.033        | <b>0.040</b> | <b>0.038</b> | <b>0.039</b> | 960             |
| 0.5            | 0.7            | A1         | 26       | 2        | 4        | 5        | <b>0.045</b> | <b>0.051</b> | <b>0.040</b> | 0.031        | 0.035        | 0.035        | 0.035        | 1000            |
| 0.5            | 0.7            | A2         | 16       | 3        | 3        | 5        | <b>0.048</b> | <b>0.058</b> | <b>0.045</b> | 0.033        | <b>0.037</b> | <b>0.037</b> | <b>0.037</b> | 999             |
| 0.5            | 0.7            | A3         | 12       | 2        | 4        | 5        | <b>0.047</b> | 0.070        | <b>0.046</b> | 0.032        | <b>0.039</b> | <b>0.039</b> | <b>0.037</b> | 992             |
| 0.5            | 0.7            | A4         | 14       | 3        | 3        | 5        | <b>0.056</b> | 0.071        | <b>0.056</b> | <b>0.037</b> | <b>0.044</b> | <b>0.045</b> | <b>0.044</b> | 998             |
| 0.8            | 0.9            | A2         | 30       | 3        | 3        | 5        | <b>0.056</b> | <b>0.064</b> | <b>0.056</b> | <b>0.043</b> | <b>0.048</b> | <b>0.049</b> | <b>0.048</b> | 1000            |
| 0.8            | 0.9            | A3         | 22       | 2        | 4        | 5        | <b>0.050</b> | <b>0.061</b> | <b>0.050</b> | <b>0.041</b> | <b>0.045</b> | <b>0.046</b> | <b>0.044</b> | 1000            |
| 0.8            | 0.9            | A4         | 28       | 2        | 4        | 5        | <b>0.042</b> | <b>0.050</b> | <b>0.045</b> | <b>0.037</b> | <b>0.042</b> | <b>0.040</b> | <b>0.042</b> | 1000            |
| 0.8            | 0.9            | A4         | 24       | 3        | 3        | 5        | <b>0.048</b> | <b>0.060</b> | <b>0.048</b> | <b>0.044</b> | <b>0.045</b> | <b>0.045</b> | <b>0.045</b> | 1000            |

<sup>a</sup> Bold text indicates acceptable empirical type I error rate (from 3.6% to 6.4%).

<sup>b</sup> A1:  $\alpha = (0.4, 0.1, 0.03)$ ; A2:  $\alpha = (0.15, 0.08, 0.02)$ ; A3:  $\alpha = (0.1, 0.02, 0.01)$ ; A4:  $\alpha = (0.05, 0.05, 0.02)$ .

<sup>c</sup> CR: Convergence rate (out of 1000) for assessing the empirical type I error rate.

**Web Table 7:** Simulation scenarios, predicted power, and empirical power<sup>a</sup> of GEE/MAEE analyses based on different variance estimators, using the extended nested exchangeable working correlation structure under unbalanced four-level CRTs with CV = 0.50. MB: Model-based variance estimator; BC0: Uncorrected sandwich estimator of [Liang and Zeger \(1986\)](#); BC1: Bias-corrected sandwich estimator of [Kauermann and Carroll \(2001\)](#); BC2: Bias-corrected sandwich estimator of [Mancl and DeRouen \(2001\)](#); AVG: Bias-corrected sandwich estimator with standard error as the average of those from BC1 and BC2; BC3: Bias-corrected sandwich estimator of [Fay and Graubard \(2001\)](#); BC4: Bias-corrected sandwich estimator of [Morel et al. \(2003\)](#).

| P <sub>0</sub> | P <sub>1</sub> | $\alpha^b$ | <i>n</i> | <i>m</i> | <i>k</i> | <i>l</i> | Pred <sup>c</sup> | MB           | BC0          | BC1          | BC2          | AVG          | BC3          | BC4          | CR <sup>d</sup> |
|----------------|----------------|------------|----------|----------|----------|----------|-------------------|--------------|--------------|--------------|--------------|--------------|--------------|--------------|-----------------|
| 0.2            | 0.5            | A1         | 14       | 2        | 3        | 5        | 0.817             | <b>0.841</b> | 0.879        | <b>0.834</b> | 0.787        | <b>0.811</b> | <b>0.810</b> | <b>0.807</b> | 994             |
| 0.2            | 0.5            | A1         | 14       | 2        | 3        | 10       | 0.845             | <b>0.843</b> | 0.874        | <b>0.843</b> | 0.797        | <b>0.827</b> | <b>0.824</b> | <b>0.823</b> | 999             |
| 0.2            | 0.5            | A1         | 14       | 2        | 4        | 5        | 0.866             | <b>0.873</b> | 0.903        | <b>0.870</b> | 0.821        | <b>0.848</b> | <b>0.848</b> | <b>0.848</b> | 997             |
| 0.2            | 0.5            | A1         | 12       | 3        | 3        | 5        | 0.857             | <b>0.865</b> | 0.902        | <b>0.861</b> | 0.808        | 0.830        | <b>0.832</b> | 0.829        | 999             |
| 0.2            | 0.5            | A2         | 10       | 2        | 3        | 5        | 0.808             | <b>0.799</b> | 0.861        | <b>0.799</b> | 0.724        | 0.761        | 0.760        | 0.755        | 975             |
| 0.2            | 0.5            | A2         | 10       | 2        | 3        | 10       | 0.870             | <b>0.868</b> | 0.926        | <b>0.879</b> | 0.816        | <b>0.851</b> | <b>0.847</b> | 0.842        | 988             |
| 0.2            | 0.5            | A2         | 10       | 2        | 4        | 5        | 0.852             | <b>0.872</b> | 0.916        | <b>0.861</b> | 0.774        | <b>0.829</b> | 0.820        | 0.819        | 991             |
| 0.2            | 0.5            | A2         | 8        | 3        | 3        | 5        | 0.800             | <b>0.796</b> | 0.861        | <b>0.782</b> | 0.688        | 0.746        | 0.733        | 0.734        | 890             |
| 0.2            | 0.5            | A3         | 8        | 2        | 3        | 5        | 0.851             | <b>0.834</b> | 0.896        | <b>0.838</b> | 0.724        | 0.786        | 0.781        | 0.778        | 767             |
| 0.2            | 0.5            | A3         | 8        | 3        | 3        | 5        | 0.936             | <b>0.942</b> | 0.969        | <b>0.942</b> | 0.883        | <b>0.918</b> | <b>0.912</b> | <b>0.913</b> | 814             |
| 0.2            | 0.5            | A4         | 8        | 3        | 3        | 5        | 0.892             | <b>0.901</b> | 0.946        | <b>0.895</b> | 0.811        | 0.854        | 0.859        | 0.850        | 856             |
| 0.1            | 0.3            | A1         | 22       | 2        | 3        | 5        | 0.829             | <b>0.849</b> | 0.866        | <b>0.840</b> | <b>0.815</b> | <b>0.827</b> | <b>0.826</b> | <b>0.828</b> | 967             |
| 0.1            | 0.3            | A1         | 20       | 2        | 3        | 10       | 0.818             | 0.854        | 0.875        | 0.847        | <b>0.822</b> | <b>0.832</b> | <b>0.829</b> | <b>0.832</b> | 967             |
| 0.1            | 0.3            | A1         | 20       | 2        | 4        | 5        | 0.841             | <b>0.853</b> | 0.872        | <b>0.852</b> | <b>0.819</b> | <b>0.837</b> | <b>0.835</b> | <b>0.834</b> | 989             |
| 0.1            | 0.3            | A1         | 16       | 3        | 3        | 5        | 0.805             | <b>0.818</b> | 0.859        | <b>0.814</b> | 0.760        | <b>0.789</b> | <b>0.784</b> | <b>0.784</b> | 991             |
| 0.1            | 0.3            | A2         | 16       | 2        | 3        | 5        | 0.844             | <b>0.869</b> | 0.897        | <b>0.867</b> | <b>0.823</b> | <b>0.843</b> | <b>0.844</b> | <b>0.840</b> | 991             |
| 0.1            | 0.3            | A2         | 14       | 2        | 3        | 10       | 0.849             | <b>0.866</b> | 0.890        | <b>0.863</b> | <b>0.832</b> | <b>0.851</b> | <b>0.854</b> | <b>0.854</b> | 996             |
| 0.1            | 0.3            | A2         | 14       | 2        | 4        | 5        | 0.829             | <b>0.848</b> | 0.879        | <b>0.846</b> | 0.800        | <b>0.827</b> | <b>0.822</b> | <b>0.824</b> | 991             |
| 0.1            | 0.3            | A2         | 12       | 3        | 3        | 5        | 0.826             | <b>0.846</b> | 0.883        | <b>0.844</b> | 0.796        | <b>0.816</b> | <b>0.820</b> | <b>0.821</b> | 995             |
| 0.1            | 0.3            | A3         | 12       | 2        | 3        | 5        | 0.873             | <b>0.896</b> | 0.914        | <b>0.885</b> | 0.839        | <b>0.866</b> | <b>0.863</b> | <b>0.862</b> | 975             |
| 0.1            | 0.3            | A3         | 10       | 3        | 3        | 5        | 0.898             | <b>0.910</b> | 0.944        | <b>0.904</b> | 0.859        | <b>0.886</b> | <b>0.878</b> | <b>0.880</b> | 959             |
| 0.1            | 0.3            | A4         | 10       | 3        | 3        | 5        | 0.837             | 0.867        | 0.910        | <b>0.858</b> | 0.806        | <b>0.833</b> | <b>0.829</b> | <b>0.827</b> | 971             |
| 0.5            | 0.7            | A1         | 26       | 2        | 4        | 5        | 0.823             | <b>0.828</b> | 0.851        | <b>0.828</b> | <b>0.807</b> | <b>0.820</b> | <b>0.818</b> | <b>0.817</b> | 1000            |
| 0.5            | 0.7            | A2         | 16       | 3        | 3        | 5        | 0.831             | 0.802        | <b>0.846</b> | <b>0.805</b> | 0.765        | 0.786        | 0.785        | 0.781        | 1000            |
| 0.5            | 0.7            | A3         | 12       | 2        | 4        | 5        | 0.827             | <b>0.810</b> | 0.859        | <b>0.806</b> | 0.757        | 0.778        | 0.782        | 0.776        | 989             |
| 0.5            | 0.7            | A4         | 14       | 3        | 3        | 5        | 0.868             | <b>0.883</b> | 0.913        | <b>0.881</b> | 0.837        | <b>0.863</b> | <b>0.868</b> | <b>0.859</b> | 999             |
| 0.8            | 0.9            | A2         | 30       | 3        | 3        | 5        | 0.804             | <b>0.803</b> | <b>0.813</b> | <b>0.797</b> | <b>0.783</b> | <b>0.789</b> | <b>0.789</b> | <b>0.790</b> | 1000            |
| 0.8            | 0.9            | A3         | 22       | 2        | 4        | 5        | 0.804             | <b>0.813</b> | 0.833        | <b>0.811</b> | <b>0.779</b> | <b>0.796</b> | <b>0.798</b> | <b>0.794</b> | 999             |
| 0.8            | 0.9            | A4         | 28       | 2        | 4        | 5        | 0.824             | <b>0.820</b> | <b>0.834</b> | <b>0.821</b> | 0.795        | <b>0.806</b> | <b>0.809</b> | <b>0.806</b> | 998             |
| 0.8            | 0.9            | A4         | 24       | 3        | 3        | 5        | 0.813             | <b>0.821</b> | 0.845        | <b>0.818</b> | <b>0.795</b> | <b>0.808</b> | <b>0.809</b> | <b>0.807</b> | 1000            |

<sup>a</sup> Bold text indicates acceptable empirical power (differing at most 2.6% from the predicted power).

<sup>b</sup> A1:  $\alpha = (0.4, 0.1, 0.03)$ ; A2:  $\alpha = (0.15, 0.08, 0.02)$ ; A3:  $\alpha = (0.1, 0.02, 0.01)$ ; A4:  $\alpha = (0.05, 0.05, 0.02)$ .

<sup>c</sup> Pred: Predicted power based on *t*-test.

<sup>d</sup> CR: Convergence rate (out of 1000) for assessing the empirical power.

**Web Table 8:** Simulation scenarios and empirical type I error rates<sup>a</sup> of GEE/MAEE analyses based on different variance estimators, using the extended nested exchangeable working correlation structure under unbalanced four-level CRTs with CV = 0.75. MB: Model-based variance estimator; BC0: Uncorrected sandwich estimator of Liang and Zeger (1986); BC1: Bias-corrected sandwich estimator of Kauermann and Carroll (2001); BC2: Bias-corrected sandwich estimator of Mancl and DeRouen (2001); AVG: Bias-corrected sandwich estimator with standard error as the average of those from BC1 and BC2; BC3: Bias-corrected sandwich estimator of Fay and Graubard (2001); BC4: Bias-corrected sandwich estimator of Morel et al. (2003).

| P <sub>0</sub> | P <sub>1</sub> | $\alpha^b$ | <i>n</i> | <i>m</i> | <i>k</i> | <i>l</i> | MB           | BC0          | BC1          | BC2          | AVG          | BC3          | BC4          | CR <sup>c</sup> |
|----------------|----------------|------------|----------|----------|----------|----------|--------------|--------------|--------------|--------------|--------------|--------------|--------------|-----------------|
| 0.2            | 0.5            | A1         | 14       | 2        | 3        | 5        | <b>0.056</b> | 0.067        | <b>0.048</b> | 0.033        | <b>0.042</b> | <b>0.039</b> | <b>0.040</b> | 983             |
| 0.2            | 0.5            | A1         | 14       | 2        | 3        | 10       | <b>0.060</b> | 0.074        | <b>0.053</b> | <b>0.043</b> | <b>0.046</b> | <b>0.047</b> | <b>0.046</b> | 973             |
| 0.2            | 0.5            | A1         | 14       | 2        | 4        | 5        | <b>0.047</b> | 0.065        | <b>0.049</b> | <b>0.039</b> | <b>0.043</b> | <b>0.043</b> | <b>0.041</b> | 989             |
| 0.2            | 0.5            | A1         | 12       | 3        | 3        | 5        | <b>0.050</b> | <b>0.062</b> | <b>0.048</b> | 0.034        | <b>0.042</b> | <b>0.041</b> | <b>0.039</b> | 983             |
| 0.2            | 0.5            | A2         | 10       | 2        | 3        | 5        | <b>0.045</b> | 0.075        | <b>0.058</b> | <b>0.038</b> | <b>0.044</b> | <b>0.046</b> | <b>0.042</b> | 933             |
| 0.2            | 0.5            | A2         | 10       | 2        | 3        | 10       | <b>0.060</b> | 0.091        | <b>0.056</b> | <b>0.039</b> | <b>0.045</b> | <b>0.049</b> | <b>0.040</b> | 946             |
| 0.2            | 0.5            | A2         | 10       | 2        | 4        | 5        | <b>0.044</b> | 0.065        | <b>0.045</b> | 0.031        | <b>0.038</b> | <b>0.038</b> | 0.031        | 956             |
| 0.2            | 0.5            | A2         | 8        | 3        | 3        | 5        | 0.034        | 0.070        | <b>0.039</b> | 0.017        | 0.028        | 0.027        | 0.023        | 816             |
| 0.2            | 0.5            | A3         | 8        | 2        | 3        | 5        | 0.027        | <b>0.044</b> | 0.024        | 0.014        | 0.017        | 0.015        | 0.017        | 662             |
| 0.2            | 0.5            | A3         | 8        | 3        | 3        | 5        | 0.027        | <b>0.058</b> | 0.027        | 0.011        | 0.015        | 0.016        | 0.014        | 739             |
| 0.2            | 0.5            | A4         | 8        | 3        | 3        | 5        | 0.031        | <b>0.057</b> | <b>0.037</b> | 0.021        | 0.026        | 0.030        | 0.024        | 776             |
| 0.1            | 0.3            | A1         | 22       | 2        | 3        | 5        | <b>0.036</b> | <b>0.061</b> | <b>0.048</b> | <b>0.040</b> | <b>0.043</b> | <b>0.042</b> | <b>0.040</b> | 934             |
| 0.1            | 0.3            | A1         | 20       | 2        | 3        | 10       | <b>0.039</b> | <b>0.063</b> | <b>0.049</b> | <b>0.042</b> | <b>0.046</b> | <b>0.047</b> | <b>0.043</b> | 945             |
| 0.1            | 0.3            | A1         | 20       | 2        | 4        | 5        | 0.035        | <b>0.060</b> | <b>0.049</b> | <b>0.037</b> | <b>0.040</b> | <b>0.043</b> | <b>0.039</b> | 968             |
| 0.1            | 0.3            | A1         | 16       | 3        | 3        | 5        | <b>0.044</b> | 0.073        | <b>0.062</b> | <b>0.049</b> | <b>0.056</b> | <b>0.053</b> | <b>0.046</b> | 968             |
| 0.1            | 0.3            | A2         | 16       | 2        | 3        | 5        | 0.033        | 0.070        | <b>0.053</b> | <b>0.038</b> | <b>0.048</b> | <b>0.042</b> | <b>0.041</b> | 966             |
| 0.1            | 0.3            | A2         | 14       | 2        | 3        | 10       | <b>0.039</b> | 0.071        | <b>0.047</b> | 0.035        | <b>0.044</b> | <b>0.041</b> | <b>0.038</b> | 964             |
| 0.1            | 0.3            | A2         | 14       | 2        | 4        | 5        | <b>0.041</b> | 0.075        | <b>0.054</b> | <b>0.038</b> | <b>0.048</b> | <b>0.044</b> | <b>0.043</b> | 978             |
| 0.1            | 0.3            | A2         | 12       | 3        | 3        | 5        | <b>0.044</b> | 0.079        | <b>0.064</b> | <b>0.049</b> | <b>0.053</b> | <b>0.053</b> | <b>0.048</b> | 973             |
| 0.1            | 0.3            | A3         | 12       | 2        | 3        | 5        | 0.027        | <b>0.062</b> | <b>0.039</b> | 0.023        | 0.031        | 0.028        | 0.024        | 932             |
| 0.1            | 0.3            | A3         | 10       | 3        | 3        | 5        | 0.035        | 0.074        | <b>0.048</b> | 0.028        | <b>0.037</b> | 0.034        | 0.031        | 917             |
| 0.1            | 0.3            | A4         | 10       | 3        | 3        | 5        | 0.032        | 0.073        | <b>0.045</b> | 0.028        | 0.035        | 0.032        | 0.030        | 902             |
| 0.5            | 0.7            | A1         | 26       | 2        | 4        | 5        | <b>0.047</b> | <b>0.053</b> | <b>0.046</b> | <b>0.037</b> | <b>0.041</b> | <b>0.042</b> | <b>0.038</b> | 1000            |
| 0.5            | 0.7            | A2         | 16       | 3        | 3        | 5        | <b>0.054</b> | 0.068        | <b>0.051</b> | <b>0.036</b> | <b>0.041</b> | <b>0.042</b> | <b>0.042</b> | 997             |
| 0.5            | 0.7            | A3         | 12       | 2        | 4        | 5        | <b>0.051</b> | 0.071        | <b>0.046</b> | 0.035        | <b>0.038</b> | <b>0.039</b> | <b>0.038</b> | 971             |
| 0.5            | 0.7            | A4         | 14       | 3        | 3        | 5        | 0.067        | 0.077        | 0.069        | <b>0.053</b> | <b>0.059</b> | <b>0.059</b> | <b>0.057</b> | 985             |
| 0.8            | 0.9            | A2         | 30       | 3        | 3        | 5        | <b>0.053</b> | <b>0.058</b> | <b>0.048</b> | <b>0.040</b> | <b>0.044</b> | <b>0.043</b> | <b>0.044</b> | 1000            |
| 0.8            | 0.9            | A3         | 22       | 2        | 4        | 5        | 0.034        | <b>0.049</b> | <b>0.038</b> | 0.028        | 0.033        | 0.034        | 0.031        | 999             |
| 0.8            | 0.9            | A4         | 28       | 2        | 4        | 5        | <b>0.042</b> | <b>0.051</b> | <b>0.041</b> | 0.033        | <b>0.036</b> | <b>0.038</b> | <b>0.036</b> | 1000            |
| 0.8            | 0.9            | A4         | 24       | 3        | 3        | 5        | 0.035        | <b>0.051</b> | <b>0.040</b> | 0.030        | 0.033        | 0.034        | 0.033        | 997             |

<sup>a</sup> Bold text indicates acceptable empirical type I error rate (from 3.6% to 6.4%).

<sup>b</sup> A1:  $\alpha = (0.4, 0.1, 0.03)$ ; A2:  $\alpha = (0.15, 0.08, 0.02)$ ; A3:  $\alpha = (0.1, 0.02, 0.01)$ ; A4:  $\alpha = (0.05, 0.05, 0.02)$ .

<sup>c</sup> CR: Convergence rate (out of 1000) for assessing the empirical type I error rate.

**Web Table 9:** Simulation scenarios, predicted power, and empirical power<sup>a</sup> of GEE/MAEE analyses based on different variance estimators, using the extended nested exchangeable working correlation structure under unbalanced four-level CRTs with CV = 0.75. MB: Model-based variance estimator; BC0: Uncorrected sandwich estimator of [Liang and Zeger \(1986\)](#); BC1: Bias-corrected sandwich estimator of [Kauermann and Carroll \(2001\)](#); BC2: Bias-corrected sandwich estimator of [Mancl and DeRouen \(2001\)](#); AVG: Bias-corrected sandwich estimator with standard error as the average of those from BC1 and BC2; BC3: Bias-corrected sandwich estimator of [Fay and Graubard \(2001\)](#); BC4: Bias-corrected sandwich estimator of [Morel et al. \(2003\)](#).

| P <sub>0</sub> | P <sub>1</sub> | $\alpha^b$ | <i>n</i> | <i>m</i> | <i>k</i> | <i>l</i> | Pred <sup>c</sup> | MB           | BC0          | BC1          | BC2          | AVG          | BC3          | BC4          | CR <sup>d</sup> |
|----------------|----------------|------------|----------|----------|----------|----------|-------------------|--------------|--------------|--------------|--------------|--------------|--------------|--------------|-----------------|
| 0.2            | 0.5            | A1         | 14       | 2        | 3        | 5        | 0.817             | <b>0.814</b> | 0.845        | <b>0.811</b> | 0.747        | 0.783        | 0.779        | 0.777        | 984             |
| 0.2            | 0.5            | A1         | 14       | 2        | 3        | 10       | 0.845             | <b>0.840</b> | 0.887        | <b>0.858</b> | 0.807        | <b>0.827</b> | <b>0.828</b> | <b>0.822</b> | 979             |
| 0.2            | 0.5            | A1         | 14       | 2        | 4        | 5        | 0.866             | <b>0.862</b> | 0.900        | <b>0.857</b> | 0.818        | 0.838        | 0.839        | 0.834        | 994             |
| 0.2            | 0.5            | A1         | 12       | 3        | 3        | 5        | 0.857             | <b>0.848</b> | 0.891        | <b>0.855</b> | 0.798        | 0.827        | 0.826        | 0.821        | 981             |
| 0.2            | 0.5            | A2         | 10       | 2        | 3        | 5        | 0.808             | <b>0.797</b> | 0.871        | <b>0.801</b> | 0.728        | 0.768        | 0.768        | 0.759        | 935             |
| 0.2            | 0.5            | A2         | 10       | 2        | 3        | 10       | 0.870             | <b>0.871</b> | 0.911        | <b>0.870</b> | 0.800        | 0.840        | 0.834        | 0.828        | 948             |
| 0.2            | 0.5            | A2         | 10       | 2        | 4        | 5        | 0.852             | <b>0.846</b> | 0.911        | <b>0.860</b> | 0.791        | 0.824        | 0.823        | 0.818        | 973             |
| 0.2            | 0.5            | A2         | 8        | 3        | 3        | 5        | 0.800             | <b>0.788</b> | 0.883        | <b>0.797</b> | 0.681        | 0.744        | 0.732        | 0.730        | 831             |
| 0.2            | 0.5            | A3         | 8        | 2        | 3        | 5        | 0.851             | <b>0.833</b> | 0.893        | 0.821        | 0.720        | 0.778        | 0.767        | 0.758        | 653             |
| 0.2            | 0.5            | A3         | 8        | 3        | 3        | 5        | 0.936             | <b>0.935</b> | 0.968        | <b>0.940</b> | 0.876        | <b>0.913</b> | <b>0.913</b> | 0.908        | 739             |
| 0.2            | 0.5            | A4         | 8        | 3        | 3        | 5        | 0.892             | <b>0.886</b> | 0.929        | <b>0.900</b> | 0.822        | <b>0.868</b> | 0.865        | 0.856        | 763             |
| 0.1            | 0.3            | A1         | 22       | 2        | 3        | 5        | 0.829             | <b>0.853</b> | 0.877        | 0.860        | <b>0.832</b> | <b>0.841</b> | <b>0.842</b> | <b>0.843</b> | 955             |
| 0.1            | 0.3            | A1         | 20       | 2        | 3        | 10       | 0.818             | <b>0.825</b> | 0.861        | <b>0.824</b> | <b>0.793</b> | <b>0.810</b> | <b>0.808</b> | <b>0.807</b> | 962             |
| 0.1            | 0.3            | A1         | 20       | 2        | 4        | 5        | 0.841             | 0.868        | 0.890        | 0.870        | <b>0.845</b> | <b>0.862</b> | <b>0.855</b> | <b>0.858</b> | 975             |
| 0.1            | 0.3            | A1         | 16       | 3        | 3        | 5        | 0.805             | <b>0.818</b> | 0.866        | <b>0.829</b> | <b>0.782</b> | <b>0.810</b> | <b>0.805</b> | <b>0.801</b> | 984             |
| 0.1            | 0.3            | A2         | 16       | 2        | 3        | 5        | 0.844             | <b>0.870</b> | 0.900        | 0.871        | <b>0.836</b> | <b>0.855</b> | <b>0.851</b> | <b>0.852</b> | 980             |
| 0.1            | 0.3            | A2         | 14       | 2        | 3        | 10       | 0.849             | <b>0.861</b> | 0.893        | <b>0.868</b> | 0.820        | <b>0.842</b> | <b>0.839</b> | <b>0.839</b> | 969             |
| 0.1            | 0.3            | A2         | 14       | 2        | 4        | 5        | 0.829             | <b>0.832</b> | 0.868        | <b>0.827</b> | 0.782        | <b>0.808</b> | 0.801        | <b>0.803</b> | 984             |
| 0.1            | 0.3            | A2         | 12       | 3        | 3        | 5        | 0.826             | <b>0.837</b> | 0.891        | <b>0.844</b> | 0.786        | <b>0.820</b> | <b>0.810</b> | <b>0.812</b> | 983             |
| 0.1            | 0.3            | A3         | 12       | 2        | 3        | 5        | 0.873             | <b>0.880</b> | 0.923        | <b>0.886</b> | 0.838        | <b>0.864</b> | <b>0.851</b> | <b>0.860</b> | 920             |
| 0.1            | 0.3            | A3         | 10       | 3        | 3        | 5        | 0.898             | <b>0.914</b> | 0.944        | <b>0.915</b> | 0.854        | <b>0.890</b> | <b>0.882</b> | <b>0.885</b> | 910             |
| 0.1            | 0.3            | A4         | 10       | 3        | 3        | 5        | 0.837             | <b>0.863</b> | 0.900        | <b>0.863</b> | 0.798        | <b>0.830</b> | <b>0.831</b> | <b>0.827</b> | 913             |
| 0.5            | 0.7            | A1         | 26       | 2        | 4        | 5        | 0.823             | <b>0.809</b> | <b>0.833</b> | <b>0.807</b> | 0.784        | <b>0.797</b> | <b>0.797</b> | <b>0.797</b> | 1000            |
| 0.5            | 0.7            | A2         | 16       | 3        | 3        | 5        | 0.831             | 0.799        | <b>0.842</b> | 0.792        | 0.757        | 0.776        | 0.779        | 0.774        | 999             |
| 0.5            | 0.7            | A3         | 12       | 2        | 4        | 5        | 0.827             | 0.777        | <b>0.831</b> | 0.784        | 0.727        | 0.761        | 0.766        | 0.754        | 973             |
| 0.5            | 0.7            | A4         | 14       | 3        | 3        | 5        | 0.868             | <b>0.869</b> | <b>0.889</b> | <b>0.867</b> | 0.838        | <b>0.852</b> | <b>0.854</b> | <b>0.850</b> | 985             |
| 0.8            | 0.9            | A2         | 30       | 3        | 3        | 5        | 0.804             | <b>0.804</b> | <b>0.821</b> | <b>0.797</b> | <b>0.786</b> | <b>0.789</b> | <b>0.789</b> | <b>0.789</b> | 1000            |
| 0.8            | 0.9            | A3         | 22       | 2        | 4        | 5        | 0.804             | <b>0.802</b> | <b>0.825</b> | <b>0.794</b> | 0.767        | 0.777        | <b>0.781</b> | <b>0.779</b> | 999             |
| 0.8            | 0.9            | A4         | 28       | 2        | 4        | 5        | 0.824             | <b>0.812</b> | <b>0.827</b> | <b>0.815</b> | <b>0.798</b> | <b>0.808</b> | <b>0.810</b> | <b>0.806</b> | 1000            |
| 0.8            | 0.9            | A4         | 24       | 3        | 3        | 5        | 0.813             | <b>0.820</b> | 0.841        | <b>0.821</b> | <b>0.796</b> | <b>0.806</b> | <b>0.810</b> | <b>0.805</b> | 990             |

<sup>a</sup> Bold text indicates acceptable empirical power (differing at most 2.6% from the predicted power).

<sup>b</sup> A1:  $\alpha = (0.4, 0.1, 0.03)$ ; A2:  $\alpha = (0.15, 0.08, 0.02)$ ; A3:  $\alpha = (0.1, 0.02, 0.01)$ ; A4:  $\alpha = (0.05, 0.05, 0.02)$ .

<sup>c</sup> Pred: Predicted power based on *t*-test.

<sup>d</sup> CR: Convergence rate (out of 1000) for assessing the empirical power.

**Web Table 10:** Simulation scenarios and empirical type I error rates<sup>a</sup> of GEE/MAEE analyses based on different variance estimators, using the extended nested exchangeable working correlation structure under unbalanced four-level CRTs with  $CV = 1.00$ . MB: Model-based variance estimator; BC0: Uncorrected sandwich estimator of [Liang and Zeger \(1986\)](#); BC1: Bias-corrected sandwich estimator of [Kauermann and Carroll \(2001\)](#); BC2: Bias-corrected sandwich estimator of [Mancl and DeRouen \(2001\)](#); AVG: Bias-corrected sandwich estimator with standard error as the average of those from BC1 and BC2; BC3: Bias-corrected sandwich estimator of [Fay and Graubard \(2001\)](#); BC4: Bias-corrected sandwich estimator of [Morel et al. \(2003\)](#).

| $P_0$ | $P_1$ | $\alpha^b$ | $n$ | $m$ | $k$ | $l$ | MB           | BC0          | BC1          | BC2          | AVG          | BC3          | BC4          | CR <sup>c</sup> |
|-------|-------|------------|-----|-----|-----|-----|--------------|--------------|--------------|--------------|--------------|--------------|--------------|-----------------|
| 0.2   | 0.5   | A1         | 14  | 2   | 3   | 5   | <b>0.048</b> | 0.072        | <b>0.051</b> | <b>0.036</b> | <b>0.045</b> | <b>0.042</b> | <b>0.042</b> | 929             |
| 0.2   | 0.5   | A1         | 14  | 2   | 3   | 10  | <b>0.048</b> | <b>0.060</b> | <b>0.046</b> | 0.035        | <b>0.040</b> | <b>0.043</b> | <b>0.039</b> | 932             |
| 0.2   | 0.5   | A1         | 14  | 2   | 4   | 5   | <b>0.052</b> | <b>0.061</b> | <b>0.043</b> | 0.033        | 0.035        | <b>0.038</b> | 0.034        | 967             |
| 0.2   | 0.5   | A1         | 12  | 3   | 3   | 5   | <b>0.052</b> | 0.072        | <b>0.053</b> | <b>0.038</b> | <b>0.047</b> | <b>0.049</b> | <b>0.042</b> | 958             |
| 0.2   | 0.5   | A2         | 10  | 2   | 3   | 5   | <b>0.038</b> | <b>0.059</b> | <b>0.038</b> | 0.019        | 0.027        | 0.026        | 0.025        | 877             |
| 0.2   | 0.5   | A2         | 10  | 2   | 3   | 10  | <b>0.050</b> | 0.084        | <b>0.056</b> | <b>0.036</b> | <b>0.042</b> | <b>0.044</b> | <b>0.040</b> | 858             |
| 0.2   | 0.5   | A2         | 10  | 2   | 4   | 5   | <b>0.040</b> | 0.069        | <b>0.043</b> | 0.025        | <b>0.036</b> | <b>0.037</b> | 0.033        | 917             |
| 0.2   | 0.5   | A2         | 8   | 3   | 3   | 5   | 0.023        | <b>0.053</b> | 0.023        | 0.005        | 0.008        | 0.012        | 0.005        | 767             |
| 0.2   | 0.5   | A3         | 8   | 2   | 3   | 5   | 0.026        | 0.067        | <b>0.040</b> | 0.012        | 0.022        | 0.019        | 0.012        | 581             |
| 0.2   | 0.5   | A3         | 8   | 3   | 3   | 5   | 0.016        | <b>0.047</b> | 0.019        | 0.007        | 0.010        | 0.012        | 0.009        | 684             |
| 0.2   | 0.5   | A4         | 8   | 3   | 3   | 5   | 0.023        | <b>0.053</b> | 0.023        | 0.014        | 0.017        | 0.019        | 0.014        | 694             |
| 0.1   | 0.3   | A1         | 22  | 2   | 3   | 5   | 0.032        | <b>0.050</b> | <b>0.042</b> | 0.035        | <b>0.036</b> | 0.034        | 0.032        | 895             |
| 0.1   | 0.3   | A1         | 20  | 2   | 3   | 10  | <b>0.045</b> | 0.071        | <b>0.061</b> | <b>0.049</b> | <b>0.056</b> | <b>0.052</b> | <b>0.049</b> | 890             |
| 0.1   | 0.3   | A1         | 20  | 2   | 4   | 5   | <b>0.043</b> | <b>0.064</b> | <b>0.046</b> | 0.035        | <b>0.040</b> | <b>0.038</b> | <b>0.038</b> | 936             |
| 0.1   | 0.3   | A1         | 16  | 3   | 3   | 5   | <b>0.041</b> | <b>0.061</b> | <b>0.045</b> | 0.034        | <b>0.036</b> | 0.032        | 0.032        | 937             |
| 0.1   | 0.3   | A2         | 16  | 2   | 3   | 5   | <b>0.041</b> | 0.065        | <b>0.050</b> | <b>0.039</b> | <b>0.041</b> | <b>0.040</b> | <b>0.037</b> | 941             |
| 0.1   | 0.3   | A2         | 14  | 2   | 3   | 10  | <b>0.042</b> | 0.071        | <b>0.053</b> | <b>0.038</b> | <b>0.042</b> | <b>0.038</b> | <b>0.041</b> | 903             |
| 0.1   | 0.3   | A2         | 14  | 2   | 4   | 5   | <b>0.047</b> | 0.077        | <b>0.057</b> | <b>0.045</b> | <b>0.051</b> | <b>0.047</b> | <b>0.047</b> | 952             |
| 0.1   | 0.3   | A2         | 12  | 3   | 3   | 5   | <b>0.039</b> | 0.072        | <b>0.051</b> | <b>0.037</b> | <b>0.043</b> | <b>0.044</b> | <b>0.038</b> | 954             |
| 0.1   | 0.3   | A3         | 12  | 2   | 3   | 5   | <b>0.036</b> | <b>0.062</b> | <b>0.036</b> | 0.022        | 0.028        | 0.029        | 0.027        | 861             |
| 0.1   | 0.3   | A3         | 10  | 3   | 3   | 5   | 0.033        | <b>0.060</b> | <b>0.044</b> | 0.025        | 0.030        | 0.031        | 0.030        | 868             |
| 0.1   | 0.3   | A4         | 10  | 3   | 3   | 5   | <b>0.040</b> | 0.084        | <b>0.053</b> | 0.029        | <b>0.039</b> | <b>0.037</b> | 0.033        | 829             |
| 0.5   | 0.7   | A1         | 26  | 2   | 4   | 5   | <b>0.050</b> | <b>0.062</b> | <b>0.052</b> | <b>0.047</b> | <b>0.051</b> | <b>0.051</b> | <b>0.051</b> | 999             |
| 0.5   | 0.7   | A2         | 16  | 3   | 3   | 5   | <b>0.038</b> | <b>0.054</b> | <b>0.038</b> | 0.029        | 0.033        | 0.033        | 0.032        | 996             |
| 0.5   | 0.7   | A3         | 12  | 2   | 4   | 5   | <b>0.054</b> | 0.087        | 0.069        | <b>0.047</b> | <b>0.055</b> | <b>0.060</b> | <b>0.053</b> | 924             |
| 0.5   | 0.7   | A4         | 14  | 3   | 3   | 5   | <b>0.057</b> | 0.069        | <b>0.056</b> | <b>0.042</b> | <b>0.052</b> | <b>0.053</b> | <b>0.051</b> | 961             |
| 0.8   | 0.9   | A2         | 30  | 3   | 3   | 5   | <b>0.046</b> | <b>0.049</b> | <b>0.045</b> | <b>0.040</b> | <b>0.043</b> | <b>0.042</b> | <b>0.043</b> | 1000            |
| 0.8   | 0.9   | A3         | 22  | 2   | 4   | 5   | <b>0.059</b> | 0.071        | <b>0.062</b> | <b>0.052</b> | <b>0.056</b> | <b>0.057</b> | <b>0.056</b> | 994             |
| 0.8   | 0.9   | A4         | 28  | 2   | 4   | 5   | 0.028        | <b>0.039</b> | 0.030        | 0.025        | 0.025        | 0.025        | 0.025        | 994             |
| 0.8   | 0.9   | A4         | 24  | 3   | 3   | 5   | <b>0.038</b> | <b>0.060</b> | <b>0.046</b> | 0.032        | <b>0.036</b> | 0.034        | 0.035        | 988             |

<sup>a</sup> Bold text indicates acceptable empirical type I error rate (from 3.6% to 6.4%).

<sup>b</sup> A1:  $\alpha = (0.4, 0.1, 0.03)$ ; A2:  $\alpha = (0.15, 0.08, 0.02)$ ; A3:  $\alpha = (0.1, 0.02, 0.01)$ ; A4:  $\alpha = (0.05, 0.05, 0.02)$ .

<sup>c</sup> CR: Convergence rate (out of 1000) for assessing the empirical type I error rate.



**Web Table 11:** Simulation scenarios, predicted power, and empirical power<sup>a</sup> of GEE/MAEE analyses based on different variance estimators, using the extended nested exchangeable working correlation structure under unbalanced four-level CRTs with CV = 1.00. MB: Model-based variance estimator; BC0: Uncorrected sandwich estimator of [Liang and Zeger \(1986\)](#); BC1: Bias-corrected sandwich estimator of [Kauermann and Carroll \(2001\)](#); BC2: Bias-corrected sandwich estimator of [Mancl and DeRouen \(2001\)](#); AVG: Bias-corrected sandwich estimator with standard error as the average of those from BC1 and BC2; BC3: Bias-corrected sandwich estimator of [Fay and Graubard \(2001\)](#); BC4: Bias-corrected sandwich estimator of [Morel et al. \(2003\)](#).

| P <sub>0</sub> | P <sub>1</sub> | $\alpha^b$ | <i>n</i> | <i>m</i> | <i>k</i> | <i>l</i> | Pred <sup>c</sup> | MB           | BC0          | BC1          | BC2          | AVG          | BC3          | BC4          | CR <sup>d</sup> |
|----------------|----------------|------------|----------|----------|----------|----------|-------------------|--------------|--------------|--------------|--------------|--------------|--------------|--------------|-----------------|
| 0.2            | 0.5            | A1         | 14       | 2        | 3        | 5        | 0.817             | <b>0.834</b> | 0.879        | 0.844        | 0.788        | <b>0.813</b> | <b>0.807</b> | <b>0.806</b> | 953             |
| 0.2            | 0.5            | A1         | 14       | 2        | 3        | 10       | 0.845             | <b>0.838</b> | 0.878        | <b>0.847</b> | 0.798        | 0.815        | 0.813        | 0.810        | 939             |
| 0.2            | 0.5            | A1         | 14       | 2        | 4        | 5        | 0.866             | <b>0.881</b> | 0.922        | 0.894        | <b>0.844</b> | <b>0.868</b> | <b>0.867</b> | <b>0.862</b> | 977             |
| 0.2            | 0.5            | A1         | 12       | 3        | 3        | 5        | 0.857             | <b>0.869</b> | 0.912        | <b>0.876</b> | 0.829        | <b>0.859</b> | <b>0.849</b> | <b>0.848</b> | 969             |
| 0.2            | 0.5            | A2         | 10       | 2        | 3        | 5        | 0.808             | <b>0.791</b> | 0.860        | <b>0.808</b> | 0.717        | 0.758        | 0.752        | 0.747        | 879             |
| 0.2            | 0.5            | A2         | 10       | 2        | 3        | 10       | 0.870             | <b>0.845</b> | 0.912        | <b>0.861</b> | 0.795        | 0.827        | 0.821        | 0.821        | 877             |
| 0.2            | 0.5            | A2         | 10       | 2        | 4        | 5        | 0.852             | <b>0.861</b> | 0.910        | <b>0.867</b> | 0.807        | <b>0.841</b> | <b>0.842</b> | <b>0.835</b> | 922             |
| 0.2            | 0.5            | A2         | 8        | 3        | 3        | 5        | 0.800             | <b>0.790</b> | 0.876        | <b>0.807</b> | 0.697        | 0.749        | 0.745        | 0.728        | 753             |
| 0.2            | 0.5            | A3         | 8        | 2        | 3        | 5        | 0.851             | 0.801        | 0.887        | 0.817        | 0.708        | 0.763        | 0.771        | 0.765        | 558             |
| 0.2            | 0.5            | A3         | 8        | 3        | 3        | 5        | 0.936             | <b>0.930</b> | 0.975        | <b>0.938</b> | 0.869        | 0.906        | <b>0.910</b> | 0.900        | 647             |
| 0.2            | 0.5            | A4         | 8        | 3        | 3        | 5        | 0.892             | <b>0.897</b> | 0.953        | <b>0.904</b> | 0.817        | 0.858        | 0.860        | 0.849        | 677             |
| 0.1            | 0.3            | A1         | 22       | 2        | 3        | 5        | 0.829             | <b>0.830</b> | <b>0.852</b> | <b>0.835</b> | <b>0.805</b> | <b>0.821</b> | <b>0.823</b> | <b>0.819</b> | 924             |
| 0.1            | 0.3            | A1         | 20       | 2        | 3        | 10       | 0.818             | <b>0.809</b> | 0.846        | <b>0.808</b> | 0.784        | <b>0.794</b> | <b>0.794</b> | <b>0.794</b> | 911             |
| 0.1            | 0.3            | A1         | 20       | 2        | 4        | 5        | 0.841             | 0.869        | 0.888        | 0.869        | <b>0.836</b> | <b>0.850</b> | <b>0.847</b> | <b>0.845</b> | 954             |
| 0.1            | 0.3            | A1         | 16       | 3        | 3        | 5        | 0.805             | <b>0.824</b> | 0.854        | <b>0.818</b> | 0.776        | <b>0.790</b> | <b>0.795</b> | <b>0.793</b> | 961             |
| 0.1            | 0.3            | A2         | 16       | 2        | 3        | 5        | 0.844             | <b>0.844</b> | 0.888        | <b>0.848</b> | 0.809        | <b>0.830</b> | <b>0.825</b> | <b>0.825</b> | 954             |
| 0.1            | 0.3            | A2         | 14       | 2        | 3        | 10       | 0.849             | <b>0.862</b> | 0.890        | <b>0.857</b> | 0.799        | <b>0.835</b> | <b>0.829</b> | <b>0.826</b> | 937             |
| 0.1            | 0.3            | A2         | 14       | 2        | 4        | 5        | 0.829             | <b>0.829</b> | 0.874        | <b>0.827</b> | 0.778        | <b>0.805</b> | <b>0.806</b> | <b>0.805</b> | 967             |
| 0.1            | 0.3            | A2         | 12       | 3        | 3        | 5        | 0.826             | <b>0.837</b> | 0.867        | <b>0.834</b> | 0.779        | <b>0.807</b> | <b>0.805</b> | <b>0.808</b> | 974             |
| 0.1            | 0.3            | A3         | 12       | 2        | 3        | 5        | 0.873             | <b>0.868</b> | 0.917        | <b>0.871</b> | 0.820        | 0.845        | 0.841        | 0.841        | 866             |
| 0.1            | 0.3            | A3         | 10       | 3        | 3        | 5        | 0.898             | <b>0.911</b> | 0.941        | <b>0.904</b> | 0.856        | <b>0.880</b> | <b>0.881</b> | <b>0.878</b> | 869             |
| 0.1            | 0.3            | A4         | 10       | 3        | 3        | 5        | 0.837             | 0.871        | 0.922        | 0.875        | 0.810        | <b>0.843</b> | <b>0.835</b> | <b>0.835</b> | 859             |
| 0.5            | 0.7            | A1         | 26       | 2        | 4        | 5        | 0.823             | 0.766        | 0.790        | 0.767        | 0.744        | 0.753        | 0.755        | 0.754        | 1000            |
| 0.5            | 0.7            | A2         | 16       | 3        | 3        | 5        | 0.831             | <b>0.812</b> | <b>0.842</b> | <b>0.809</b> | 0.770        | 0.790        | 0.792        | 0.783        | 995             |
| 0.5            | 0.7            | A3         | 12       | 2        | 4        | 5        | 0.827             | 0.792        | 0.856        | <b>0.807</b> | 0.740        | 0.774        | 0.780        | 0.765        | 938             |
| 0.5            | 0.7            | A4         | 14       | 3        | 3        | 5        | 0.868             | <b>0.889</b> | 0.917        | <b>0.890</b> | <b>0.852</b> | <b>0.872</b> | <b>0.873</b> | <b>0.869</b> | 955             |
| 0.8            | 0.9            | A2         | 30       | 3        | 3        | 5        | 0.804             | <b>0.802</b> | <b>0.820</b> | <b>0.791</b> | 0.769        | <b>0.780</b> | <b>0.783</b> | <b>0.779</b> | 999             |
| 0.8            | 0.9            | A3         | 22       | 2        | 4        | 5        | 0.804             | <b>0.799</b> | <b>0.828</b> | <b>0.802</b> | 0.770        | <b>0.783</b> | <b>0.787</b> | <b>0.784</b> | 993             |
| 0.8            | 0.9            | A4         | 28       | 2        | 4        | 5        | 0.824             | <b>0.829</b> | <b>0.846</b> | <b>0.834</b> | <b>0.811</b> | <b>0.823</b> | <b>0.825</b> | <b>0.822</b> | 985             |
| 0.8            | 0.9            | A4         | 24       | 3        | 3        | 5        | 0.813             | <b>0.833</b> | 0.855        | <b>0.829</b> | <b>0.802</b> | <b>0.814</b> | <b>0.815</b> | <b>0.812</b> | 982             |

<sup>a</sup> Bold text indicates acceptable empirical power (differing at most 2.6% from the predicted power).

<sup>b</sup> A1:  $\alpha = (0.4, 0.1, 0.03)$ ; A2:  $\alpha = (0.15, 0.08, 0.02)$ ; A3:  $\alpha = (0.1, 0.02, 0.01)$ ; A4:  $\alpha = (0.05, 0.05, 0.02)$ .

<sup>c</sup> Pred: Predicted power based on *t*-test.

<sup>d</sup> CR: Convergence rate (out of 1000) for assessing the empirical power.



**Web Table 12:** Simulation scenarios and empirical type I error rates<sup>a</sup> of GEE analyses based on different variance estimators, using an independence working correlation matrix under unbalanced four-level CRTs with CV = 0.25. MB: Model-based variance estimator; BC0: Uncorrected sandwich estimator of [Liang and Zeger \(1986\)](#); BC1: Bias-corrected sandwich estimator of [Kauermann and Carroll \(2001\)](#); BC2: Bias-corrected sandwich estimator of [Mancl and DeRouen \(2001\)](#); AVG: Bias-corrected sandwich estimator with standard error as the average of those from BC1 and BC2; BC3: Bias-corrected sandwich estimator of [Fay and Graubard \(2001\)](#); BC4: Bias-corrected sandwich estimator of [Morel et al. \(2003\)](#).

| $P_0$ | $P_1$ | $\alpha^b$ | $n$ | $m$ | $k$ | $l$ | MB           | BC0          | BC1          | BC2          | AVG          | BC3          | BC4          | CR <sup>c</sup> |
|-------|-------|------------|-----|-----|-----|-----|--------------|--------------|--------------|--------------|--------------|--------------|--------------|-----------------|
| 0.2   | 0.5   | A1         | 14  | 2   | 3   | 5   | 0.309        | 0.078        | <b>0.058</b> | <b>0.042</b> | <b>0.047</b> | <b>0.046</b> | <b>0.048</b> | 1000            |
| 0.2   | 0.5   | A1         | 14  | 2   | 3   | 10  | 0.417        | 0.073        | <b>0.055</b> | <b>0.041</b> | <b>0.048</b> | <b>0.047</b> | <b>0.048</b> | 1000            |
| 0.2   | 0.5   | A1         | 14  | 2   | 4   | 5   | 0.321        | 0.070        | <b>0.048</b> | 0.035        | <b>0.040</b> | <b>0.040</b> | <b>0.041</b> | 1000            |
| 0.2   | 0.5   | A1         | 12  | 3   | 3   | 5   | 0.309        | 0.073        | <b>0.054</b> | <b>0.037</b> | <b>0.043</b> | <b>0.043</b> | <b>0.044</b> | 1000            |
| 0.2   | 0.5   | A2         | 10  | 2   | 3   | 5   | 0.146        | 0.071        | <b>0.048</b> | 0.023        | 0.032        | 0.032        | 0.029        | 1000            |
| 0.2   | 0.5   | A2         | 10  | 2   | 3   | 10  | 0.289        | 0.079        | <b>0.054</b> | 0.033        | <b>0.045</b> | <b>0.045</b> | <b>0.047</b> | 1000            |
| 0.2   | 0.5   | A2         | 10  | 2   | 4   | 5   | 0.187        | 0.077        | <b>0.058</b> | 0.033        | <b>0.043</b> | <b>0.045</b> | <b>0.042</b> | 1000            |
| 0.2   | 0.5   | A2         | 8   | 3   | 3   | 5   | 0.133        | 0.075        | <b>0.044</b> | 0.024        | 0.033        | 0.034        | 0.029        | 1000            |
| 0.2   | 0.5   | A3         | 8   | 2   | 3   | 5   | <b>0.056</b> | 0.075        | <b>0.042</b> | 0.026        | 0.030        | 0.031        | 0.024        | 1000            |
| 0.2   | 0.5   | A3         | 8   | 3   | 3   | 5   | 0.070        | 0.082        | <b>0.052</b> | 0.029        | <b>0.042</b> | <b>0.042</b> | 0.033        | 1000            |
| 0.2   | 0.5   | A4         | 8   | 3   | 3   | 5   | 0.088        | 0.081        | <b>0.045</b> | 0.025        | 0.032        | 0.032        | 0.026        | 1000            |
| 0.1   | 0.3   | A1         | 22  | 2   | 3   | 5   | 0.283        | 0.075        | <b>0.063</b> | <b>0.048</b> | <b>0.054</b> | <b>0.051</b> | <b>0.053</b> | 1000            |
| 0.1   | 0.3   | A1         | 20  | 2   | 3   | 10  | 0.457        | 0.082        | <b>0.064</b> | <b>0.051</b> | <b>0.059</b> | <b>0.061</b> | <b>0.057</b> | 1000            |
| 0.1   | 0.3   | A1         | 20  | 2   | 4   | 5   | 0.323        | 0.068        | <b>0.051</b> | <b>0.044</b> | <b>0.048</b> | <b>0.049</b> | <b>0.048</b> | 1000            |
| 0.1   | 0.3   | A1         | 16  | 3   | 3   | 5   | 0.334        | 0.079        | 0.067        | <b>0.049</b> | <b>0.056</b> | <b>0.058</b> | <b>0.056</b> | 1000            |
| 0.1   | 0.3   | A2         | 16  | 2   | 3   | 5   | 0.184        | 0.071        | <b>0.053</b> | <b>0.041</b> | <b>0.049</b> | <b>0.046</b> | <b>0.047</b> | 1000            |
| 0.1   | 0.3   | A2         | 14  | 2   | 3   | 10  | 0.300        | 0.081        | <b>0.062</b> | <b>0.047</b> | <b>0.056</b> | <b>0.053</b> | <b>0.054</b> | 1000            |
| 0.1   | 0.3   | A2         | 14  | 2   | 4   | 5   | 0.213        | 0.076        | <b>0.057</b> | <b>0.046</b> | <b>0.050</b> | <b>0.049</b> | <b>0.048</b> | 1000            |
| 0.1   | 0.3   | A2         | 12  | 3   | 3   | 5   | 0.183        | 0.081        | <b>0.057</b> | <b>0.038</b> | <b>0.048</b> | <b>0.042</b> | <b>0.045</b> | 1000            |
| 0.1   | 0.3   | A3         | 12  | 2   | 3   | 5   | 0.100        | 0.079        | <b>0.058</b> | <b>0.040</b> | <b>0.046</b> | <b>0.049</b> | <b>0.044</b> | 1000            |
| 0.1   | 0.3   | A3         | 10  | 3   | 3   | 5   | 0.090        | 0.077        | <b>0.055</b> | 0.033        | <b>0.040</b> | <b>0.042</b> | <b>0.038</b> | 1000            |
| 0.1   | 0.3   | A4         | 10  | 3   | 3   | 5   | 0.126        | 0.074        | <b>0.051</b> | <b>0.036</b> | <b>0.041</b> | <b>0.043</b> | <b>0.039</b> | 1000            |
| 0.5   | 0.7   | A1         | 26  | 2   | 4   | 5   | 0.338        | 0.067        | <b>0.056</b> | <b>0.042</b> | <b>0.051</b> | <b>0.051</b> | <b>0.051</b> | 1000            |
| 0.5   | 0.7   | A2         | 16  | 3   | 3   | 5   | 0.230        | 0.065        | <b>0.048</b> | 0.035        | <b>0.039</b> | <b>0.039</b> | <b>0.041</b> | 1000            |
| 0.5   | 0.7   | A3         | 12  | 2   | 4   | 5   | 0.133        | 0.092        | 0.066        | <b>0.043</b> | <b>0.051</b> | <b>0.053</b> | <b>0.048</b> | 1000            |
| 0.5   | 0.7   | A4         | 14  | 3   | 3   | 5   | 0.145        | 0.074        | <b>0.053</b> | <b>0.036</b> | <b>0.043</b> | <b>0.042</b> | <b>0.041</b> | 1000            |
| 0.8   | 0.9   | A2         | 30  | 3   | 3   | 5   | 0.238        | <b>0.055</b> | <b>0.051</b> | <b>0.043</b> | <b>0.046</b> | <b>0.046</b> | <b>0.046</b> | 1000            |
| 0.8   | 0.9   | A3         | 22  | 2   | 4   | 5   | 0.150        | 0.065        | <b>0.054</b> | <b>0.043</b> | <b>0.047</b> | <b>0.047</b> | <b>0.047</b> | 1000            |
| 0.8   | 0.9   | A4         | 28  | 2   | 4   | 5   | 0.182        | <b>0.044</b> | <b>0.040</b> | <b>0.037</b> | <b>0.038</b> | <b>0.038</b> | <b>0.038</b> | 1000            |
| 0.8   | 0.9   | A4         | 24  | 3   | 3   | 5   | 0.191        | 0.070        | <b>0.061</b> | <b>0.054</b> | <b>0.058</b> | <b>0.059</b> | <b>0.058</b> | 1000            |

<sup>a</sup> Bold text indicates acceptable empirical type I error rate (from 3.6% to 6.4%).

<sup>b</sup> A1:  $\alpha = (0.4, 0.1, 0.03)$ ; A2:  $\alpha = (0.15, 0.08, 0.02)$ ; A3:  $\alpha = (0.1, 0.02, 0.01)$ ; A4:  $\alpha = (0.05, 0.05, 0.02)$ .

<sup>c</sup> CR: Convergence rate (out of 1000) for assessing the empirical type I error rate.

**Web Table 13:** Simulation scenarios, predicted power, and empirical power<sup>a</sup> of GEE analyses based on different variance estimators, using an independence working correlation matrix under unbalanced four-level CRTs with CV = 0.25. MB: Model-based variance estimator; BC0: Uncorrected sandwich estimator of [Liang and Zeger \(1986\)](#); BC1: Bias-corrected sandwich estimator of [Kauermann and Carroll \(2001\)](#); BC2: Bias-corrected sandwich estimator of [Mancl and DeRouen \(2001\)](#); AVG: Bias-corrected sandwich estimator with standard error as the average of those from BC1 and BC2; BC3: Bias-corrected sandwich estimator of [Fay and Graubard \(2001\)](#); BC4: Bias-corrected sandwich estimator of [Morel et al. \(2003\)](#).

| P <sub>0</sub> | P <sub>1</sub> | $\alpha^b$ | <i>n</i> | <i>m</i> | <i>k</i> | <i>l</i> | Pred <sup>c</sup> | MB    | BC0          | BC1          | BC2          | AVG          | BC3          | BC4          | CR <sup>d</sup> |
|----------------|----------------|------------|----------|----------|----------|----------|-------------------|-------|--------------|--------------|--------------|--------------|--------------|--------------|-----------------|
| 0.2            | 0.5            | A1         | 14       | 2        | 3        | 5        | 0.817             | 0.978 | <b>0.835</b> | <b>0.793</b> | 0.755        | 0.778        | 0.777        | 0.778        | 1000            |
| 0.2            | 0.5            | A1         | 14       | 2        | 3        | 10       | 0.845             | 0.994 | 0.887        | <b>0.846</b> | 0.796        | 0.818        | 0.816        | <b>0.819</b> | 1000            |
| 0.2            | 0.5            | A1         | 14       | 2        | 4        | 5        | 0.866             | 0.994 | 0.896        | <b>0.862</b> | 0.818        | <b>0.841</b> | <b>0.842</b> | <b>0.842</b> | 1000            |
| 0.2            | 0.5            | A1         | 12       | 3        | 3        | 5        | 0.857             | 0.993 | 0.884        | <b>0.847</b> | 0.787        | 0.815        | 0.815        | 0.816        | 1000            |
| 0.2            | 0.5            | A2         | 10       | 2        | 3        | 5        | 0.808             | 0.977 | 0.886        | <b>0.823</b> | 0.745        | <b>0.792</b> | <b>0.789</b> | <b>0.794</b> | 1000            |
| 0.2            | 0.5            | A2         | 10       | 2        | 3        | 10       | 0.870             | 0.997 | 0.919        | <b>0.877</b> | 0.801        | <b>0.844</b> | 0.843        | <b>0.847</b> | 1000            |
| 0.2            | 0.5            | A2         | 10       | 2        | 4        | 5        | 0.852             | 0.990 | 0.921        | <b>0.867</b> | 0.816        | <b>0.836</b> | <b>0.835</b> | <b>0.837</b> | 1000            |
| 0.2            | 0.5            | A2         | 8        | 3        | 3        | 5        | 0.800             | 0.979 | 0.887        | <b>0.802</b> | 0.695        | 0.749        | 0.751        | 0.759        | 1000            |
| 0.2            | 0.5            | A3         | 8        | 2        | 3        | 5        | 0.851             | 0.979 | 0.920        | <b>0.858</b> | 0.758        | 0.810        | 0.800        | 0.816        | 1000            |
| 0.2            | 0.5            | A3         | 8        | 3        | 3        | 5        | 0.936             | 0.994 | 0.975        | <b>0.953</b> | 0.902        | <b>0.928</b> | <b>0.930</b> | <b>0.933</b> | 1000            |
| 0.2            | 0.5            | A4         | 8        | 3        | 3        | 5        | 0.892             | 0.993 | 0.951        | <b>0.911</b> | 0.841        | <b>0.885</b> | <b>0.887</b> | <b>0.889</b> | 1000            |
| 0.1            | 0.3            | A1         | 22       | 2        | 3        | 5        | 0.829             | 0.988 | 0.870        | <b>0.845</b> | <b>0.818</b> | <b>0.829</b> | <b>0.828</b> | <b>0.830</b> | 1000            |
| 0.1            | 0.3            | A1         | 20       | 2        | 3        | 10       | 0.818             | 0.996 | 0.863        | 0.845        | <b>0.815</b> | <b>0.831</b> | <b>0.828</b> | <b>0.835</b> | 1000            |
| 0.1            | 0.3            | A1         | 20       | 2        | 4        | 5        | 0.841             | 0.988 | 0.872        | <b>0.846</b> | 0.812        | <b>0.831</b> | <b>0.824</b> | <b>0.831</b> | 1000            |
| 0.1            | 0.3            | A1         | 16       | 3        | 3        | 5        | 0.805             | 0.988 | 0.856        | 0.833        | <b>0.792</b> | <b>0.813</b> | <b>0.809</b> | <b>0.816</b> | 1000            |
| 0.1            | 0.3            | A2         | 16       | 2        | 3        | 5        | 0.844             | 0.988 | 0.893        | 0.876        | <b>0.845</b> | <b>0.860</b> | <b>0.857</b> | <b>0.860</b> | 1000            |
| 0.1            | 0.3            | A2         | 14       | 2        | 3        | 10       | 0.849             | 0.991 | 0.895        | <b>0.867</b> | 0.822        | <b>0.849</b> | <b>0.846</b> | <b>0.851</b> | 1000            |
| 0.1            | 0.3            | A2         | 14       | 2        | 4        | 5        | 0.829             | 0.985 | 0.884        | <b>0.850</b> | <b>0.805</b> | <b>0.825</b> | <b>0.823</b> | <b>0.829</b> | 1000            |
| 0.1            | 0.3            | A2         | 12       | 3        | 3        | 5        | 0.826             | 0.984 | 0.892        | 0.858        | <b>0.806</b> | <b>0.838</b> | <b>0.834</b> | <b>0.838</b> | 1000            |
| 0.1            | 0.3            | A3         | 12       | 2        | 3        | 5        | 0.873             | 0.977 | 0.932        | 0.905        | <b>0.856</b> | <b>0.880</b> | <b>0.876</b> | <b>0.884</b> | 1000            |
| 0.1            | 0.3            | A3         | 10       | 3        | 3        | 5        | 0.898             | 0.994 | 0.953        | <b>0.924</b> | <b>0.877</b> | <b>0.899</b> | <b>0.893</b> | <b>0.903</b> | 1000            |
| 0.1            | 0.3            | A4         | 10       | 3        | 3        | 5        | 0.837             | 0.982 | 0.916        | 0.871        | <b>0.816</b> | <b>0.851</b> | <b>0.845</b> | <b>0.851</b> | 1000            |
| 0.5            | 0.7            | A1         | 26       | 2        | 4        | 5        | 0.823             | 0.983 | <b>0.849</b> | <b>0.830</b> | <b>0.803</b> | <b>0.815</b> | <b>0.818</b> | <b>0.817</b> | 1000            |
| 0.5            | 0.7            | A2         | 16       | 3        | 3        | 5        | 0.831             | 0.956 | <b>0.849</b> | <b>0.815</b> | 0.774        | 0.798        | 0.800        | 0.799        | 1000            |
| 0.5            | 0.7            | A3         | 12       | 2        | 4        | 5        | 0.827             | 0.944 | 0.871        | <b>0.835</b> | 0.781        | <b>0.807</b> | <b>0.808</b> | <b>0.808</b> | 1000            |
| 0.5            | 0.7            | A4         | 14       | 3        | 3        | 5        | 0.868             | 0.972 | 0.902        | <b>0.873</b> | 0.824        | <b>0.848</b> | <b>0.851</b> | <b>0.852</b> | 1000            |
| 0.8            | 0.9            | A2         | 30       | 3        | 3        | 5        | 0.804             | 0.958 | 0.832        | <b>0.816</b> | <b>0.797</b> | <b>0.811</b> | <b>0.813</b> | <b>0.810</b> | 1000            |
| 0.8            | 0.9            | A3         | 22       | 2        | 4        | 5        | 0.804             | 0.938 | <b>0.821</b> | <b>0.799</b> | 0.768        | <b>0.782</b> | <b>0.787</b> | <b>0.784</b> | 1000            |
| 0.8            | 0.9            | A4         | 28       | 2        | 4        | 5        | 0.824             | 0.966 | <b>0.843</b> | <b>0.820</b> | <b>0.799</b> | <b>0.811</b> | <b>0.814</b> | <b>0.814</b> | 1000            |
| 0.8            | 0.9            | A4         | 24       | 3        | 3        | 5        | 0.813             | 0.948 | <b>0.827</b> | <b>0.809</b> | <b>0.788</b> | <b>0.800</b> | <b>0.804</b> | <b>0.800</b> | 1000            |

<sup>a</sup> Bold text indicates acceptable empirical power (differing at most 2.6% from the predicted power).

<sup>b</sup> A1:  $\alpha = (0.4, 0.1, 0.03)$ ; A2:  $\alpha = (0.15, 0.08, 0.02)$ ; A3:  $\alpha = (0.1, 0.02, 0.01)$ ; A4:  $\alpha = (0.05, 0.05, 0.02)$ .

<sup>c</sup> Pred: Predicted power based on *t*-test.

<sup>d</sup> CR: Convergence rate (out of 1000) for assessing the empirical power.

**Web Table 14:** Simulation scenarios and empirical type I error rates<sup>a</sup> of GEE analyses based on different variance estimators, using an independence working correlation matrix under unbalanced four-level CRTs with CV = 0.50. MB: Model-based variance estimator; BC0: Uncorrected sandwich estimator of [Liang and Zeger \(1986\)](#); BC1: Bias-corrected sandwich estimator of [Kauermann and Carroll \(2001\)](#); BC2: Bias-corrected sandwich estimator of [Mancl and DeRouen \(2001\)](#); AVG: Bias-corrected sandwich estimator with standard error as the average of those from BC1 and BC2; BC3: Bias-corrected sandwich estimator of [Fay and Graubard \(2001\)](#); BC4: Bias-corrected sandwich estimator of [Morel et al. \(2003\)](#).

| $P_0$ | $P_1$ | $\alpha^b$ | $n$ | $m$ | $k$ | $l$ | MB           | BC0          | BC1          | BC2          | AVG          | BC3          | BC4          | CR <sup>c</sup> |
|-------|-------|------------|-----|-----|-----|-----|--------------|--------------|--------------|--------------|--------------|--------------|--------------|-----------------|
| 0.2   | 0.5   | A1         | 14  | 2   | 3   | 5   | 0.296        | 0.069        | <b>0.053</b> | <b>0.041</b> | <b>0.047</b> | <b>0.044</b> | <b>0.047</b> | 1000            |
| 0.2   | 0.5   | A1         | 14  | 2   | 3   | 10  | 0.456        | 0.086        | <b>0.060</b> | <b>0.039</b> | <b>0.055</b> | <b>0.052</b> | <b>0.055</b> | 1000            |
| 0.2   | 0.5   | A1         | 14  | 2   | 4   | 5   | 0.360        | 0.081        | <b>0.064</b> | <b>0.046</b> | <b>0.056</b> | <b>0.054</b> | <b>0.056</b> | 1000            |
| 0.2   | 0.5   | A1         | 12  | 3   | 3   | 5   | 0.311        | 0.067        | <b>0.049</b> | <b>0.036</b> | <b>0.045</b> | <b>0.041</b> | <b>0.044</b> | 1000            |
| 0.2   | 0.5   | A2         | 10  | 2   | 3   | 5   | 0.181        | 0.072        | <b>0.051</b> | 0.035        | <b>0.040</b> | <b>0.040</b> | <b>0.037</b> | 1000            |
| 0.2   | 0.5   | A2         | 10  | 2   | 3   | 10  | 0.311        | 0.081        | <b>0.051</b> | 0.034        | <b>0.039</b> | <b>0.038</b> | <b>0.039</b> | 1000            |
| 0.2   | 0.5   | A2         | 10  | 2   | 4   | 5   | 0.199        | 0.075        | <b>0.051</b> | 0.030        | <b>0.040</b> | <b>0.038</b> | <b>0.038</b> | 1000            |
| 0.2   | 0.5   | A2         | 8   | 3   | 3   | 5   | 0.168        | 0.078        | <b>0.046</b> | 0.027        | <b>0.036</b> | <b>0.036</b> | 0.032        | 1000            |
| 0.2   | 0.5   | A3         | 8   | 2   | 3   | 5   | <b>0.061</b> | 0.072        | <b>0.044</b> | 0.028        | <b>0.040</b> | <b>0.037</b> | 0.028        | 1000            |
| 0.2   | 0.5   | A3         | 8   | 3   | 3   | 5   | 0.079        | 0.068        | <b>0.049</b> | 0.031        | <b>0.041</b> | <b>0.036</b> | 0.030        | 1000            |
| 0.2   | 0.5   | A4         | 8   | 3   | 3   | 5   | 0.104        | <b>0.063</b> | 0.033        | 0.021        | 0.027        | 0.027        | 0.023        | 1000            |
| 0.1   | 0.3   | A1         | 22  | 2   | 3   | 5   | 0.326        | 0.085        | 0.073        | <b>0.057</b> | 0.066        | <b>0.060</b> | <b>0.064</b> | 1000            |
| 0.1   | 0.3   | A1         | 20  | 2   | 3   | 10  | 0.495        | 0.083        | 0.072        | <b>0.062</b> | 0.069        | <b>0.064</b> | 0.066        | 1000            |
| 0.1   | 0.3   | A1         | 20  | 2   | 4   | 5   | 0.364        | 0.075        | <b>0.058</b> | <b>0.046</b> | <b>0.048</b> | <b>0.049</b> | <b>0.049</b> | 1000            |
| 0.1   | 0.3   | A1         | 16  | 3   | 3   | 5   | 0.339        | 0.081        | 0.066        | <b>0.051</b> | <b>0.055</b> | <b>0.055</b> | <b>0.052</b> | 1000            |
| 0.1   | 0.3   | A2         | 16  | 2   | 3   | 5   | 0.198        | 0.079        | <b>0.061</b> | <b>0.042</b> | <b>0.046</b> | <b>0.051</b> | <b>0.048</b> | 1000            |
| 0.1   | 0.3   | A2         | 14  | 2   | 3   | 10  | 0.318        | 0.070        | <b>0.050</b> | <b>0.042</b> | <b>0.045</b> | <b>0.045</b> | <b>0.045</b> | 1000            |
| 0.1   | 0.3   | A2         | 14  | 2   | 4   | 5   | 0.228        | 0.078        | <b>0.062</b> | <b>0.044</b> | <b>0.051</b> | <b>0.047</b> | <b>0.049</b> | 1000            |
| 0.1   | 0.3   | A2         | 12  | 3   | 3   | 5   | 0.201        | 0.081        | <b>0.056</b> | <b>0.040</b> | <b>0.045</b> | <b>0.044</b> | <b>0.044</b> | 1000            |
| 0.1   | 0.3   | A3         | 12  | 2   | 3   | 5   | 0.091        | 0.076        | <b>0.059</b> | <b>0.037</b> | <b>0.048</b> | <b>0.044</b> | <b>0.044</b> | 1000            |
| 0.1   | 0.3   | A3         | 10  | 3   | 3   | 5   | 0.098        | 0.082        | <b>0.061</b> | <b>0.042</b> | <b>0.047</b> | <b>0.048</b> | <b>0.041</b> | 1000            |
| 0.1   | 0.3   | A4         | 10  | 3   | 3   | 5   | 0.138        | 0.086        | <b>0.057</b> | 0.033        | <b>0.040</b> | <b>0.038</b> | <b>0.038</b> | 1000            |
| 0.5   | 0.7   | A1         | 26  | 2   | 4   | 5   | 0.368        | <b>0.047</b> | <b>0.038</b> | 0.032        | 0.035        | <b>0.036</b> | <b>0.036</b> | 1000            |
| 0.5   | 0.7   | A2         | 16  | 3   | 3   | 5   | 0.218        | <b>0.059</b> | <b>0.043</b> | <b>0.036</b> | <b>0.038</b> | <b>0.039</b> | <b>0.039</b> | 1000            |
| 0.5   | 0.7   | A3         | 12  | 2   | 4   | 5   | 0.132        | 0.067        | <b>0.052</b> | 0.032        | <b>0.039</b> | <b>0.041</b> | <b>0.037</b> | 1000            |
| 0.5   | 0.7   | A4         | 14  | 3   | 3   | 5   | 0.161        | 0.068        | <b>0.051</b> | 0.033        | <b>0.043</b> | <b>0.043</b> | <b>0.042</b> | 1000            |
| 0.8   | 0.9   | A2         | 30  | 3   | 3   | 5   | 0.259        | <b>0.057</b> | <b>0.050</b> | <b>0.041</b> | <b>0.049</b> | <b>0.048</b> | <b>0.049</b> | 1000            |
| 0.8   | 0.9   | A3         | 22  | 2   | 4   | 5   | 0.156        | <b>0.063</b> | <b>0.051</b> | <b>0.045</b> | <b>0.048</b> | <b>0.048</b> | <b>0.048</b> | 1000            |
| 0.8   | 0.9   | A4         | 28  | 2   | 4   | 5   | 0.190        | <b>0.052</b> | <b>0.039</b> | 0.035        | <b>0.038</b> | <b>0.037</b> | <b>0.038</b> | 1000            |
| 0.8   | 0.9   | A4         | 24  | 3   | 3   | 5   | 0.196        | <b>0.064</b> | <b>0.051</b> | <b>0.043</b> | <b>0.050</b> | <b>0.050</b> | <b>0.049</b> | 1000            |

<sup>a</sup> Bold text indicates acceptable empirical type I error rate (from 3.6% to 6.4%).

<sup>b</sup> A1:  $\alpha = (0.4, 0.1, 0.03)$ ; A2:  $\alpha = (0.15, 0.08, 0.02)$ ; A3:  $\alpha = (0.1, 0.02, 0.01)$ ; A4:  $\alpha = (0.05, 0.05, 0.02)$ .

<sup>c</sup> CR: Convergence rate (out of 1000) for assessing the empirical type I error rate.

**Web Table 15:** Simulation scenarios, predicted power, and empirical power<sup>a</sup> of GEE analyses based on different variance estimators, using an independence working correlation matrix under unbalanced four-level CRTs with CV = 0.50. MB: Model-based variance estimator; BC0: Uncorrected sandwich estimator of [Liang and Zeger \(1986\)](#); BC1: Bias-corrected sandwich estimator of [Kauermann and Carroll \(2001\)](#); BC2: Bias-corrected sandwich estimator of [Mancl and DeRouen \(2001\)](#); AVG: Bias-corrected sandwich estimator with standard error as the average of those from BC1 and BC2; BC3: Bias-corrected sandwich estimator of [Fay and Graubard \(2001\)](#); BC4: Bias-corrected sandwich estimator of [Morel et al. \(2003\)](#).

| P <sub>0</sub> | P <sub>1</sub> | $\alpha^b$ | <i>n</i> | <i>m</i> | <i>k</i> | <i>l</i> | Pred <sup>c</sup> | MB    | BC0          | BC1          | BC2          | AVG          | BC3          | BC4          | CR <sup>d</sup> |
|----------------|----------------|------------|----------|----------|----------|----------|-------------------|-------|--------------|--------------|--------------|--------------|--------------|--------------|-----------------|
| 0.2            | 0.5            | A1         | 14       | 2        | 3        | 5        | 0.817             | 0.984 | 0.850        | <b>0.813</b> | 0.748        | 0.782        | 0.778        | 0.788        | 1000            |
| 0.2            | 0.5            | A1         | 14       | 2        | 3        | 10       | 0.845             | 0.995 | <b>0.842</b> | 0.793        | 0.741        | 0.776        | 0.773        | 0.782        | 1000            |
| 0.2            | 0.5            | A1         | 14       | 2        | 4        | 5        | 0.866             | 0.985 | <b>0.885</b> | <b>0.852</b> | 0.798        | 0.829        | 0.825        | 0.837        | 1000            |
| 0.2            | 0.5            | A1         | 12       | 3        | 3        | 5        | 0.857             | 0.992 | 0.884        | <b>0.843</b> | 0.767        | 0.806        | 0.807        | 0.813        | 1000            |
| 0.2            | 0.5            | A2         | 10       | 2        | 3        | 5        | 0.808             | 0.968 | 0.849        | <b>0.785</b> | 0.707        | 0.748        | 0.745        | 0.754        | 1000            |
| 0.2            | 0.5            | A2         | 10       | 2        | 3        | 10       | 0.870             | 0.991 | 0.911        | <b>0.859</b> | 0.794        | 0.834        | 0.828        | 0.839        | 1000            |
| 0.2            | 0.5            | A2         | 10       | 2        | 4        | 5        | 0.852             | 0.990 | 0.913        | <b>0.854</b> | 0.768        | 0.813        | 0.810        | 0.823        | 1000            |
| 0.2            | 0.5            | A2         | 8        | 3        | 3        | 5        | 0.800             | 0.975 | 0.868        | <b>0.790</b> | 0.685        | 0.744        | 0.727        | 0.750        | 1000            |
| 0.2            | 0.5            | A3         | 8        | 2        | 3        | 5        | 0.851             | 0.963 | 0.903        | <b>0.841</b> | 0.740        | 0.791        | 0.789        | 0.798        | 1000            |
| 0.2            | 0.5            | A3         | 8        | 3        | 3        | 5        | 0.936             | 0.993 | 0.971        | <b>0.947</b> | 0.874        | <b>0.914</b> | <b>0.915</b> | <b>0.920</b> | 1000            |
| 0.2            | 0.5            | A4         | 8        | 3        | 3        | 5        | 0.892             | 0.991 | 0.947        | <b>0.903</b> | 0.823        | 0.860        | 0.858        | 0.865        | 1000            |
| 0.1            | 0.3            | A1         | 22       | 2        | 3        | 5        | 0.829             | 0.987 | 0.858        | <b>0.834</b> | <b>0.804</b> | <b>0.817</b> | <b>0.815</b> | <b>0.821</b> | 1000            |
| 0.1            | 0.3            | A1         | 20       | 2        | 3        | 10       | 0.818             | 0.990 | 0.846        | <b>0.812</b> | 0.772        | <b>0.792</b> | 0.788        | <b>0.798</b> | 1000            |
| 0.1            | 0.3            | A1         | 20       | 2        | 4        | 5        | 0.841             | 0.992 | <b>0.852</b> | <b>0.828</b> | 0.802        | <b>0.815</b> | <b>0.815</b> | <b>0.819</b> | 1000            |
| 0.1            | 0.3            | A1         | 16       | 3        | 3        | 5        | 0.805             | 0.986 | 0.833        | <b>0.789</b> | 0.739        | 0.764        | 0.761        | 0.770        | 1000            |
| 0.1            | 0.3            | A2         | 16       | 2        | 3        | 5        | 0.844             | 0.986 | 0.893        | <b>0.860</b> | 0.811        | <b>0.837</b> | <b>0.836</b> | <b>0.842</b> | 1000            |
| 0.1            | 0.3            | A2         | 14       | 2        | 3        | 10       | 0.849             | 0.995 | 0.880        | <b>0.846</b> | 0.804        | 0.816        | 0.820        | <b>0.823</b> | 1000            |
| 0.1            | 0.3            | A2         | 14       | 2        | 4        | 5        | 0.829             | 0.984 | 0.876        | <b>0.832</b> | 0.786        | <b>0.813</b> | 0.800        | <b>0.810</b> | 1000            |
| 0.1            | 0.3            | A2         | 12       | 3        | 3        | 5        | 0.826             | 0.986 | 0.877        | <b>0.841</b> | 0.789        | <b>0.816</b> | <b>0.804</b> | <b>0.818</b> | 1000            |
| 0.1            | 0.3            | A3         | 12       | 2        | 3        | 5        | 0.873             | 0.975 | 0.918        | <b>0.884</b> | 0.828        | <b>0.851</b> | 0.840        | <b>0.855</b> | 1000            |
| 0.1            | 0.3            | A3         | 10       | 3        | 3        | 5        | 0.898             | 0.989 | 0.942        | <b>0.907</b> | 0.846        | <b>0.878</b> | 0.870        | <b>0.883</b> | 1000            |
| 0.1            | 0.3            | A4         | 10       | 3        | 3        | 5        | 0.837             | 0.983 | 0.913        | <b>0.859</b> | 0.805        | <b>0.828</b> | <b>0.831</b> | <b>0.834</b> | 1000            |
| 0.5            | 0.7            | A1         | 26       | 2        | 4        | 5        | 0.823             | 0.981 | <b>0.820</b> | <b>0.801</b> | 0.780        | 0.785        | 0.787        | 0.787        | 1000            |
| 0.5            | 0.7            | A2         | 16       | 3        | 3        | 5        | 0.831             | 0.961 | <b>0.833</b> | 0.797        | 0.752        | 0.772        | 0.774        | 0.778        | 1000            |
| 0.5            | 0.7            | A3         | 12       | 2        | 4        | 5        | 0.827             | 0.938 | <b>0.849</b> | 0.798        | 0.744        | 0.772        | 0.777        | 0.779        | 1000            |
| 0.5            | 0.7            | A4         | 14       | 3        | 3        | 5        | 0.868             | 0.974 | 0.905        | <b>0.872</b> | 0.818        | <b>0.845</b> | <b>0.850</b> | <b>0.849</b> | 1000            |
| 0.8            | 0.9            | A2         | 30       | 3        | 3        | 5        | 0.804             | 0.962 | <b>0.807</b> | <b>0.789</b> | 0.774        | <b>0.779</b> | <b>0.781</b> | <b>0.780</b> | 1000            |
| 0.8            | 0.9            | A3         | 22       | 2        | 4        | 5        | 0.804             | 0.936 | <b>0.820</b> | <b>0.789</b> | 0.756        | 0.774        | <b>0.778</b> | 0.776        | 1000            |
| 0.8            | 0.9            | A4         | 28       | 2        | 4        | 5        | 0.824             | 0.951 | <b>0.830</b> | <b>0.806</b> | 0.786        | <b>0.798</b> | <b>0.800</b> | <b>0.799</b> | 1000            |
| 0.8            | 0.9            | A4         | 24       | 3        | 3        | 5        | 0.813             | 0.949 | <b>0.833</b> | <b>0.815</b> | 0.781        | <b>0.801</b> | <b>0.804</b> | <b>0.804</b> | 1000            |

<sup>a</sup> Bold text indicates acceptable empirical power (differing at most 2.6% from the predicted power).

<sup>b</sup> A1:  $\alpha = (0.4, 0.1, 0.03)$ ; A2:  $\alpha = (0.15, 0.08, 0.02)$ ; A3:  $\alpha = (0.1, 0.02, 0.01)$ ; A4:  $\alpha = (0.05, 0.05, 0.02)$ .

<sup>c</sup> Pred: Predicted power based on *t*-test.

<sup>d</sup> CR: Convergence rate (out of 1000) for assessing the empirical power.

**Web Table 16:** Simulation scenarios and empirical type I error rates<sup>a</sup> of GEE analyses based on different variance estimators, using an independence working correlation matrix under unbalanced four-level CRTs with CV = 0.75. MB: Model-based variance estimator; BC0: Uncorrected sandwich estimator of [Liang and Zeger \(1986\)](#); BC1: Bias-corrected sandwich estimator of [Kauermann and Carroll \(2001\)](#); BC2: Bias-corrected sandwich estimator of [Mancl and DeRouen \(2001\)](#); AVG: Bias-corrected sandwich estimator with standard error as the average of those from BC1 and BC2; BC3: Bias-corrected sandwich estimator of [Fay and Graubard \(2001\)](#); BC4: Bias-corrected sandwich estimator of [Morel et al. \(2003\)](#).

| P <sub>0</sub> | P <sub>1</sub> | $\alpha^b$ | n  | m | k | l  | MB    | BC0          | BC1          | BC2          | AVG          | BC3          | BC4          | CR <sup>c</sup> |
|----------------|----------------|------------|----|---|---|----|-------|--------------|--------------|--------------|--------------|--------------|--------------|-----------------|
| 0.2            | 0.5            | A1         | 14 | 2 | 3 | 5  | 0.332 | 0.079        | <b>0.056</b> | <b>0.041</b> | <b>0.046</b> | <b>0.043</b> | <b>0.047</b> | 1000            |
| 0.2            | 0.5            | A1         | 14 | 2 | 3 | 10 | 0.476 | 0.094        | 0.070        | <b>0.041</b> | <b>0.052</b> | <b>0.048</b> | <b>0.054</b> | 1000            |
| 0.2            | 0.5            | A1         | 14 | 2 | 4 | 5  | 0.347 | 0.079        | <b>0.063</b> | <b>0.045</b> | <b>0.055</b> | <b>0.057</b> | <b>0.055</b> | 1000            |
| 0.2            | 0.5            | A1         | 12 | 3 | 3 | 5  | 0.348 | 0.080        | <b>0.061</b> | <b>0.036</b> | <b>0.046</b> | <b>0.045</b> | <b>0.046</b> | 1000            |
| 0.2            | 0.5            | A2         | 10 | 2 | 3 | 5  | 0.185 | 0.073        | <b>0.051</b> | 0.031        | <b>0.038</b> | <b>0.038</b> | <b>0.038</b> | 1000            |
| 0.2            | 0.5            | A2         | 10 | 2 | 3 | 10 | 0.322 | 0.092        | <b>0.064</b> | <b>0.039</b> | <b>0.054</b> | <b>0.046</b> | <b>0.052</b> | 1000            |
| 0.2            | 0.5            | A2         | 10 | 2 | 4 | 5  | 0.196 | 0.070        | <b>0.051</b> | <b>0.036</b> | <b>0.043</b> | <b>0.042</b> | <b>0.043</b> | 1000            |
| 0.2            | 0.5            | A2         | 8  | 3 | 3 | 5  | 0.186 | 0.079        | <b>0.049</b> | 0.028        | 0.034        | 0.034        | 0.034        | 1000            |
| 0.2            | 0.5            | A3         | 8  | 2 | 3 | 5  | 0.070 | 0.072        | <b>0.049</b> | 0.033        | <b>0.041</b> | <b>0.039</b> | 0.034        | 1000            |
| 0.2            | 0.5            | A3         | 8  | 3 | 3 | 5  | 0.102 | 0.082        | <b>0.045</b> | 0.024        | 0.032        | 0.032        | 0.025        | 1000            |
| 0.2            | 0.5            | A4         | 8  | 3 | 3 | 5  | 0.115 | 0.079        | <b>0.045</b> | 0.026        | 0.032        | 0.034        | 0.030        | 1000            |
| 0.1            | 0.3            | A1         | 22 | 2 | 3 | 5  | 0.344 | 0.086        | 0.067        | <b>0.054</b> | <b>0.058</b> | <b>0.054</b> | <b>0.058</b> | 1000            |
| 0.1            | 0.3            | A1         | 20 | 2 | 3 | 10 | 0.514 | 0.082        | 0.065        | <b>0.051</b> | <b>0.056</b> | <b>0.054</b> | <b>0.058</b> | 1000            |
| 0.1            | 0.3            | A1         | 20 | 2 | 4 | 5  | 0.385 | 0.077        | <b>0.057</b> | <b>0.047</b> | <b>0.051</b> | <b>0.048</b> | <b>0.051</b> | 1000            |
| 0.1            | 0.3            | A1         | 16 | 3 | 3 | 5  | 0.349 | 0.080        | 0.066        | <b>0.058</b> | <b>0.064</b> | <b>0.059</b> | <b>0.061</b> | 1000            |
| 0.1            | 0.3            | A2         | 16 | 2 | 3 | 5  | 0.213 | 0.077        | <b>0.064</b> | <b>0.052</b> | <b>0.057</b> | <b>0.055</b> | <b>0.055</b> | 1000            |
| 0.1            | 0.3            | A2         | 14 | 2 | 3 | 10 | 0.334 | 0.081        | <b>0.060</b> | <b>0.043</b> | <b>0.048</b> | <b>0.050</b> | <b>0.050</b> | 1000            |
| 0.1            | 0.3            | A2         | 14 | 2 | 4 | 5  | 0.257 | 0.074        | <b>0.060</b> | <b>0.048</b> | <b>0.054</b> | <b>0.052</b> | <b>0.055</b> | 1000            |
| 0.1            | 0.3            | A2         | 12 | 3 | 3 | 5  | 0.231 | 0.093        | <b>0.062</b> | <b>0.045</b> | <b>0.054</b> | <b>0.053</b> | <b>0.052</b> | 999             |
| 0.1            | 0.3            | A3         | 12 | 2 | 3 | 5  | 0.090 | 0.069        | <b>0.048</b> | 0.028        | 0.033        | 0.033        | 0.034        | 1000            |
| 0.1            | 0.3            | A3         | 10 | 3 | 3 | 5  | 0.123 | 0.080        | <b>0.054</b> | 0.031        | <b>0.043</b> | <b>0.038</b> | <b>0.044</b> | 1000            |
| 0.1            | 0.3            | A4         | 10 | 3 | 3 | 5  | 0.136 | 0.071        | <b>0.046</b> | 0.033        | <b>0.038</b> | <b>0.036</b> | <b>0.036</b> | 1000            |
| 0.5            | 0.7            | A1         | 26 | 2 | 4 | 5  | 0.382 | <b>0.055</b> | <b>0.049</b> | <b>0.038</b> | <b>0.043</b> | <b>0.042</b> | <b>0.045</b> | 1000            |
| 0.5            | 0.7            | A2         | 16 | 3 | 3 | 5  | 0.229 | <b>0.064</b> | <b>0.046</b> | <b>0.039</b> | <b>0.044</b> | <b>0.044</b> | <b>0.044</b> | 1000            |
| 0.5            | 0.7            | A3         | 12 | 2 | 4 | 5  | 0.136 | 0.081        | <b>0.051</b> | <b>0.039</b> | <b>0.045</b> | <b>0.043</b> | <b>0.044</b> | 1000            |
| 0.5            | 0.7            | A4         | 14 | 3 | 3 | 5  | 0.176 | 0.077        | <b>0.060</b> | <b>0.050</b> | <b>0.052</b> | <b>0.054</b> | <b>0.054</b> | 1000            |
| 0.8            | 0.9            | A2         | 30 | 3 | 3 | 5  | 0.258 | <b>0.062</b> | <b>0.050</b> | <b>0.045</b> | <b>0.047</b> | <b>0.047</b> | <b>0.047</b> | 1000            |
| 0.8            | 0.9            | A3         | 22 | 2 | 4 | 5  | 0.164 | <b>0.050</b> | <b>0.043</b> | 0.032        | <b>0.037</b> | <b>0.037</b> | <b>0.037</b> | 1000            |
| 0.8            | 0.9            | A4         | 28 | 2 | 4 | 5  | 0.197 | <b>0.054</b> | <b>0.046</b> | <b>0.039</b> | <b>0.045</b> | <b>0.043</b> | <b>0.045</b> | 1000            |
| 0.8            | 0.9            | A4         | 24 | 3 | 3 | 5  | 0.200 | <b>0.048</b> | 0.030        | 0.025        | 0.027        | 0.027        | 0.027        | 1000            |

<sup>a</sup> Bold text indicates acceptable empirical type I error rate (from 3.6% to 6.4%).

<sup>b</sup> A1:  $\alpha = (0.4, 0.1, 0.03)$ ; A2:  $\alpha = (0.15, 0.08, 0.02)$ ; A3:  $\alpha = (0.1, 0.02, 0.01)$ ; A4:  $\alpha = (0.05, 0.05, 0.02)$ .

<sup>c</sup> CR: Convergence rate (out of 1000) for assessing the empirical type I error rate.

**Web Table 17:** Simulation scenarios, predicted power, and empirical power<sup>a</sup> of GEE analyses based on different variance estimators, using an independence working correlation matrix under unbalanced four-level CRTs with CV = 0.75. MB: Model-based variance estimator; BC0: Uncorrected sandwich estimator of [Liang and Zeger \(1986\)](#); BC1: Bias-corrected sandwich estimator of [Kauermann and Carroll \(2001\)](#); BC2: Bias-corrected sandwich estimator of [Mancl and DeRouen \(2001\)](#); AVG: Bias-corrected sandwich estimator with standard error as the average of those from BC1 and BC2; BC3: Bias-corrected sandwich estimator of [Fay and Graubard \(2001\)](#); BC4: Bias-corrected sandwich estimator of [Morel et al. \(2003\)](#).

| P <sub>0</sub> | P <sub>1</sub> | $\alpha^b$ | n  | m | k | l  | Pred <sup>c</sup> | MB    | BC0          | BC1          | BC2   | AVG          | BC3          | BC4          | CR <sup>d</sup> |
|----------------|----------------|------------|----|---|---|----|-------------------|-------|--------------|--------------|-------|--------------|--------------|--------------|-----------------|
| 0.2            | 0.5            | A1         | 14 | 2 | 3 | 5  | 0.817             | 0.978 | <b>0.799</b> | 0.751        | 0.674 | 0.706        | 0.702        | 0.720        | 1000            |
| 0.2            | 0.5            | A1         | 14 | 2 | 3 | 10 | 0.845             | 0.986 | <b>0.819</b> | 0.760        | 0.700 | 0.728        | 0.720        | 0.741        | 1000            |
| 0.2            | 0.5            | A1         | 14 | 2 | 4 | 5  | 0.866             | 0.993 | <b>0.850</b> | 0.801        | 0.742 | 0.763        | 0.762        | 0.775        | 1000            |
| 0.2            | 0.5            | A1         | 12 | 3 | 3 | 5  | 0.857             | 0.984 | <b>0.836</b> | 0.790        | 0.740 | 0.767        | 0.763        | 0.772        | 1000            |
| 0.2            | 0.5            | A2         | 10 | 2 | 3 | 5  | 0.808             | 0.975 | 0.845        | <b>0.786</b> | 0.684 | 0.740        | 0.736        | 0.759        | 1000            |
| 0.2            | 0.5            | A2         | 10 | 2 | 3 | 10 | 0.870             | 0.992 | <b>0.892</b> | 0.824        | 0.742 | 0.795        | 0.782        | 0.805        | 1000            |
| 0.2            | 0.5            | A2         | 10 | 2 | 4 | 5  | 0.852             | 0.984 | 0.898        | <b>0.835</b> | 0.764 | 0.801        | 0.794        | 0.807        | 1000            |
| 0.2            | 0.5            | A2         | 8  | 3 | 3 | 5  | 0.800             | 0.978 | 0.863        | <b>0.784</b> | 0.655 | 0.726        | 0.713        | 0.734        | 1000            |
| 0.2            | 0.5            | A3         | 8  | 2 | 3 | 5  | 0.851             | 0.969 | 0.906        | <b>0.828</b> | 0.703 | 0.773        | 0.768        | 0.793        | 1000            |
| 0.2            | 0.5            | A3         | 8  | 3 | 3 | 5  | 0.936             | 0.994 | 0.967        | <b>0.939</b> | 0.869 | 0.908        | <b>0.910</b> | <b>0.915</b> | 1000            |
| 0.2            | 0.5            | A4         | 8  | 3 | 3 | 5  | 0.892             | 0.988 | 0.938        | <b>0.904</b> | 0.828 | <b>0.868</b> | 0.863        | <b>0.880</b> | 1000            |
| 0.1            | 0.3            | A1         | 22 | 2 | 3 | 5  | 0.829             | 0.984 | <b>0.821</b> | 0.794        | 0.757 | 0.775        | 0.774        | 0.782        | 1000            |
| 0.1            | 0.3            | A1         | 20 | 2 | 3 | 10 | 0.818             | 0.990 | <b>0.801</b> | 0.757        | 0.718 | 0.739        | 0.735        | 0.749        | 1000            |
| 0.1            | 0.3            | A1         | 20 | 2 | 4 | 5  | 0.841             | 0.988 | <b>0.840</b> | 0.810        | 0.783 | 0.798        | 0.791        | 0.804        | 1000            |
| 0.1            | 0.3            | A1         | 16 | 3 | 3 | 5  | 0.805             | 0.982 | <b>0.818</b> | <b>0.781</b> | 0.726 | 0.755        | 0.747        | 0.760        | 1000            |
| 0.1            | 0.3            | A2         | 16 | 2 | 3 | 5  | 0.844             | 0.980 | 0.881        | <b>0.853</b> | 0.814 | <b>0.837</b> | <b>0.829</b> | <b>0.839</b> | 1000            |
| 0.1            | 0.3            | A2         | 14 | 2 | 3 | 10 | 0.849             | 0.984 | <b>0.868</b> | <b>0.830</b> | 0.770 | 0.799        | 0.793        | 0.817        | 1000            |
| 0.1            | 0.3            | A2         | 14 | 2 | 4 | 5  | 0.829             | 0.987 | <b>0.853</b> | <b>0.806</b> | 0.761 | 0.788        | 0.778        | 0.790        | 1000            |
| 0.1            | 0.3            | A2         | 12 | 3 | 3 | 5  | 0.826             | 0.988 | 0.868        | <b>0.825</b> | 0.767 | 0.794        | 0.780        | <b>0.800</b> | 999             |
| 0.1            | 0.3            | A3         | 12 | 2 | 3 | 5  | 0.873             | 0.980 | 0.906        | <b>0.869</b> | 0.807 | 0.839        | 0.833        | <b>0.853</b> | 1000            |
| 0.1            | 0.3            | A3         | 10 | 3 | 3 | 5  | 0.898             | 0.986 | 0.934        | <b>0.905</b> | 0.843 | <b>0.878</b> | <b>0.873</b> | <b>0.886</b> | 1000            |
| 0.1            | 0.3            | A4         | 10 | 3 | 3 | 5  | 0.837             | 0.983 | 0.901        | <b>0.855</b> | 0.786 | <b>0.818</b> | <b>0.822</b> | <b>0.832</b> | 1000            |
| 0.5            | 0.7            | A1         | 26 | 2 | 4 | 5  | 0.823             | 0.967 | 0.788        | 0.760        | 0.729 | 0.744        | 0.746        | 0.747        | 1000            |
| 0.5            | 0.7            | A2         | 16 | 3 | 3 | 5  | 0.831             | 0.962 | <b>0.815</b> | 0.783        | 0.735 | 0.761        | 0.763        | 0.763        | 1000            |
| 0.5            | 0.7            | A3         | 12 | 2 | 4 | 5  | 0.827             | 0.940 | <b>0.824</b> | 0.765        | 0.688 | 0.722        | 0.726        | 0.732        | 1000            |
| 0.5            | 0.7            | A4         | 14 | 3 | 3 | 5  | 0.868             | 0.975 | <b>0.889</b> | <b>0.856</b> | 0.813 | 0.836        | 0.836        | <b>0.842</b> | 1000            |
| 0.8            | 0.9            | A2         | 30 | 3 | 3 | 5  | 0.804             | 0.956 | <b>0.806</b> | <b>0.786</b> | 0.761 | 0.775        | <b>0.779</b> | <b>0.778</b> | 1000            |
| 0.8            | 0.9            | A3         | 22 | 2 | 4 | 5  | 0.804             | 0.939 | <b>0.797</b> | 0.769        | 0.739 | 0.756        | 0.759        | 0.758        | 1000            |
| 0.8            | 0.9            | A4         | 28 | 2 | 4 | 5  | 0.824             | 0.956 | <b>0.823</b> | <b>0.808</b> | 0.782 | 0.791        | 0.794        | 0.792        | 1000            |
| 0.8            | 0.9            | A4         | 24 | 3 | 3 | 5  | 0.813             | 0.953 | <b>0.828</b> | <b>0.802</b> | 0.779 | <b>0.789</b> | <b>0.793</b> | <b>0.795</b> | 1000            |

<sup>a</sup> Bold text indicates acceptable empirical power (differing at most 2.6% from the predicted power).

<sup>b</sup> A1:  $\alpha = (0.4, 0.1, 0.03)$ ; A2:  $\alpha = (0.15, 0.08, 0.02)$ ; A3:  $\alpha = (0.1, 0.02, 0.01)$ ; A4:  $\alpha = (0.05, 0.05, 0.02)$ .

<sup>c</sup> Pred: Predicted power based on *t*-test.

<sup>d</sup> CR: Convergence rate (out of 1000) for assessing the empirical power.

**Web Table 18:** Simulation scenarios and empirical type I error rates<sup>a</sup> of GEE analyses based on different variance estimators, using an independence working correlation matrix under unbalanced four-level CRTs with CV = 1.00. MB: Model-based variance estimator; BC0: Uncorrected sandwich estimator of [Liang and Zeger \(1986\)](#); BC1: Bias-corrected sandwich estimator of [Kauermann and Carroll \(2001\)](#); BC2: Bias-corrected sandwich estimator of [Mancl and DeRouen \(2001\)](#); AVG: Bias-corrected sandwich estimator with standard error as the average of those from BC1 and BC2; BC3: Bias-corrected sandwich estimator of [Fay and Graubard \(2001\)](#); BC4: Bias-corrected sandwich estimator of [Morel et al. \(2003\)](#).

| P <sub>0</sub> | P <sub>1</sub> | $\alpha^b$ | n  | m | k | l  | MB    | BC0          | BC1          | BC2          | AVG          | BC3          | BC4          | CR <sup>c</sup> |
|----------------|----------------|------------|----|---|---|----|-------|--------------|--------------|--------------|--------------|--------------|--------------|-----------------|
| 0.2            | 0.5            | A1         | 14 | 2 | 3 | 5  | 0.371 | 0.092        | <b>0.064</b> | <b>0.047</b> | <b>0.051</b> | <b>0.048</b> | <b>0.055</b> | 1000            |
| 0.2            | 0.5            | A1         | 14 | 2 | 3 | 10 | 0.504 | 0.084        | 0.067        | <b>0.052</b> | <b>0.061</b> | <b>0.057</b> | <b>0.061</b> | 1000            |
| 0.2            | 0.5            | A1         | 14 | 2 | 4 | 5  | 0.389 | 0.070        | <b>0.047</b> | 0.033        | <b>0.038</b> | <b>0.039</b> | <b>0.042</b> | 1000            |
| 0.2            | 0.5            | A1         | 12 | 3 | 3 | 5  | 0.368 | 0.081        | <b>0.055</b> | <b>0.037</b> | <b>0.047</b> | <b>0.047</b> | <b>0.047</b> | 1000            |
| 0.2            | 0.5            | A2         | 10 | 2 | 3 | 5  | 0.213 | 0.079        | <b>0.048</b> | 0.031        | <b>0.037</b> | <b>0.037</b> | <b>0.038</b> | 1000            |
| 0.2            | 0.5            | A2         | 10 | 2 | 3 | 10 | 0.355 | 0.102        | 0.070        | <b>0.041</b> | <b>0.048</b> | <b>0.050</b> | <b>0.049</b> | 1000            |
| 0.2            | 0.5            | A2         | 10 | 2 | 4 | 5  | 0.228 | 0.067        | <b>0.044</b> | 0.025        | <b>0.042</b> | 0.035        | <b>0.042</b> | 1000            |
| 0.2            | 0.5            | A2         | 8  | 3 | 3 | 5  | 0.189 | 0.084        | <b>0.052</b> | 0.027        | 0.035        | <b>0.036</b> | 0.035        | 1000            |
| 0.2            | 0.5            | A3         | 8  | 2 | 3 | 5  | 0.101 | 0.075        | <b>0.048</b> | 0.028        | <b>0.039</b> | <b>0.037</b> | 0.031        | 1000            |
| 0.2            | 0.5            | A3         | 8  | 3 | 3 | 5  | 0.111 | 0.089        | <b>0.051</b> | 0.027        | <b>0.036</b> | <b>0.037</b> | 0.032        | 1000            |
| 0.2            | 0.5            | A4         | 8  | 3 | 3 | 5  | 0.122 | 0.079        | <b>0.047</b> | 0.027        | <b>0.037</b> | <b>0.038</b> | 0.034        | 1000            |
| 0.1            | 0.3            | A1         | 22 | 2 | 3 | 5  | 0.381 | 0.085        | 0.071        | <b>0.057</b> | 0.065        | 0.066        | 0.066        | 1000            |
| 0.1            | 0.3            | A1         | 20 | 2 | 3 | 10 | 0.531 | 0.106        | 0.087        | 0.079        | 0.081        | 0.078        | 0.083        | 1000            |
| 0.1            | 0.3            | A1         | 20 | 2 | 4 | 5  | 0.407 | 0.086        | 0.070        | <b>0.053</b> | 0.067        | 0.065        | 0.066        | 1000            |
| 0.1            | 0.3            | A1         | 16 | 3 | 3 | 5  | 0.388 | 0.079        | <b>0.059</b> | <b>0.041</b> | <b>0.050</b> | <b>0.048</b> | <b>0.049</b> | 1000            |
| 0.1            | 0.3            | A2         | 16 | 2 | 3 | 5  | 0.256 | 0.085        | <b>0.061</b> | <b>0.046</b> | <b>0.056</b> | <b>0.053</b> | <b>0.054</b> | 1000            |
| 0.1            | 0.3            | A2         | 14 | 2 | 3 | 10 | 0.372 | 0.091        | <b>0.064</b> | <b>0.043</b> | <b>0.054</b> | <b>0.055</b> | <b>0.057</b> | 1000            |
| 0.1            | 0.3            | A2         | 14 | 2 | 4 | 5  | 0.283 | 0.086        | 0.068        | <b>0.052</b> | <b>0.058</b> | <b>0.059</b> | <b>0.059</b> | 1000            |
| 0.1            | 0.3            | A2         | 12 | 3 | 3 | 5  | 0.262 | 0.084        | <b>0.056</b> | <b>0.043</b> | <b>0.049</b> | <b>0.046</b> | <b>0.046</b> | 1000            |
| 0.1            | 0.3            | A3         | 12 | 2 | 3 | 5  | 0.112 | 0.071        | <b>0.049</b> | 0.031        | <b>0.038</b> | <b>0.038</b> | 0.035        | 1000            |
| 0.1            | 0.3            | A3         | 10 | 3 | 3 | 5  | 0.131 | 0.080        | <b>0.054</b> | 0.031        | <b>0.039</b> | <b>0.039</b> | <b>0.038</b> | 1000            |
| 0.1            | 0.3            | A4         | 10 | 3 | 3 | 5  | 0.147 | 0.093        | <b>0.060</b> | 0.032        | <b>0.045</b> | <b>0.046</b> | <b>0.045</b> | 1000            |
| 0.5            | 0.7            | A1         | 26 | 2 | 4 | 5  | 0.394 | <b>0.058</b> | <b>0.044</b> | <b>0.038</b> | <b>0.041</b> | <b>0.041</b> | <b>0.041</b> | 1000            |
| 0.5            | 0.7            | A2         | 16 | 3 | 3 | 5  | 0.230 | <b>0.053</b> | <b>0.038</b> | 0.029        | 0.035        | 0.034        | <b>0.036</b> | 1000            |
| 0.5            | 0.7            | A3         | 12 | 2 | 4 | 5  | 0.152 | 0.079        | <b>0.060</b> | <b>0.039</b> | <b>0.051</b> | <b>0.051</b> | <b>0.050</b> | 1000            |
| 0.5            | 0.7            | A4         | 14 | 3 | 3 | 5  | 0.187 | 0.072        | <b>0.057</b> | <b>0.045</b> | <b>0.051</b> | <b>0.052</b> | <b>0.053</b> | 1000            |
| 0.8            | 0.9            | A2         | 30 | 3 | 3 | 5  | 0.266 | <b>0.049</b> | <b>0.042</b> | 0.034        | <b>0.038</b> | <b>0.037</b> | <b>0.039</b> | 1000            |
| 0.8            | 0.9            | A3         | 22 | 2 | 4 | 5  | 0.177 | 0.070        | <b>0.056</b> | <b>0.047</b> | <b>0.049</b> | <b>0.049</b> | <b>0.050</b> | 1000            |
| 0.8            | 0.9            | A4         | 28 | 2 | 4 | 5  | 0.202 | <b>0.039</b> | 0.030        | 0.025        | 0.028        | 0.028        | 0.028        | 1000            |
| 0.8            | 0.9            | A4         | 24 | 3 | 3 | 5  | 0.202 | <b>0.050</b> | <b>0.044</b> | 0.031        | 0.034        | 0.035        | <b>0.036</b> | 1000            |

<sup>a</sup> Bold text indicates acceptable empirical type I error rate (from 3.6% to 6.4%).

<sup>b</sup> A1:  $\alpha = (0.4, 0.1, 0.03)$ ; A2:  $\alpha = (0.15, 0.08, 0.02)$ ; A3:  $\alpha = (0.1, 0.02, 0.01)$ ; A4:  $\alpha = (0.05, 0.05, 0.02)$ .

<sup>c</sup> CR: Convergence rate (out of 1000) for assessing the empirical type I error rate.



**Web Table 19:** Simulation scenarios, predicted power, and empirical power<sup>a</sup> of GEE analyses based on different variance estimators, using an independence working correlation matrix under unbalanced four-level CRTs with CV = 1.00. MB: Model-based variance estimator; BC0: Uncorrected sandwich estimator of [Liang and Zeger \(1986\)](#); BC1: Bias-corrected sandwich estimator of [Kauermann and Carroll \(2001\)](#); BC2: Bias-corrected sandwich estimator of [Mancl and DeRouen \(2001\)](#); AVG: Bias-corrected sandwich estimator with standard error as the average of those from BC1 and BC2; BC3: Bias-corrected sandwich estimator of [Fay and Graubard \(2001\)](#); BC4: Bias-corrected sandwich estimator of [Morel et al. \(2003\)](#).

| P <sub>0</sub> | P <sub>1</sub> | $\alpha^b$ | <i>n</i> | <i>m</i> | <i>k</i> | <i>l</i> | Pred <sup>c</sup> | MB    | BC0          | BC1          | BC2   | AVG          | BC3          | BC4          | CR <sup>d</sup> |
|----------------|----------------|------------|----------|----------|----------|----------|-------------------|-------|--------------|--------------|-------|--------------|--------------|--------------|-----------------|
| 0.2            | 0.5            | A1         | 14       | 2        | 3        | 5        | 0.817             | 0.978 | <b>0.802</b> | 0.740        | 0.669 | 0.700        | 0.689        | 0.720        | 1000            |
| 0.2            | 0.5            | A1         | 14       | 2        | 3        | 10       | 0.845             | 0.984 | 0.777        | 0.708        | 0.646 | 0.681        | 0.675        | 0.696        | 1000            |
| 0.2            | 0.5            | A1         | 14       | 2        | 4        | 5        | 0.866             | 0.993 | <b>0.845</b> | 0.803        | 0.744 | 0.772        | 0.767        | 0.784        | 1000            |
| 0.2            | 0.5            | A1         | 12       | 3        | 3        | 5        | 0.857             | 0.984 | <b>0.850</b> | 0.800        | 0.715 | 0.755        | 0.752        | 0.776        | 1000            |
| 0.2            | 0.5            | A2         | 10       | 2        | 3        | 5        | 0.808             | 0.976 | 0.838        | 0.764        | 0.665 | 0.717        | 0.707        | 0.744        | 1000            |
| 0.2            | 0.5            | A2         | 10       | 2        | 3        | 10       | 0.870             | 0.988 | <b>0.868</b> | 0.794        | 0.703 | 0.745        | 0.738        | 0.770        | 1000            |
| 0.2            | 0.5            | A2         | 10       | 2        | 4        | 5        | 0.852             | 0.985 | <b>0.876</b> | 0.822        | 0.729 | 0.774        | 0.774        | 0.797        | 1000            |
| 0.2            | 0.5            | A2         | 8        | 3        | 3        | 5        | 0.800             | 0.986 | 0.858        | 0.756        | 0.631 | 0.684        | 0.679        | 0.710        | 1000            |
| 0.2            | 0.5            | A3         | 8        | 2        | 3        | 5        | 0.851             | 0.967 | 0.879        | 0.807        | 0.693 | 0.763        | 0.753        | 0.781        | 1000            |
| 0.2            | 0.5            | A3         | 8        | 3        | 3        | 5        | 0.936             | 0.996 | <b>0.962</b> | <b>0.918</b> | 0.835 | 0.878        | 0.873        | 0.891        | 1000            |
| 0.2            | 0.5            | A4         | 8        | 3        | 3        | 5        | 0.892             | 0.992 | 0.949        | <b>0.897</b> | 0.823 | 0.863        | 0.862        | <b>0.877</b> | 1000            |
| 0.1            | 0.3            | A1         | 22       | 2        | 3        | 5        | 0.829             | 0.982 | 0.780        | 0.746        | 0.706 | 0.728        | 0.719        | 0.736        | 1000            |
| 0.1            | 0.3            | A1         | 20       | 2        | 3        | 10       | 0.818             | 0.982 | 0.745        | 0.710        | 0.661 | 0.682        | 0.672        | 0.696        | 1000            |
| 0.1            | 0.3            | A1         | 20       | 2        | 4        | 5        | 0.841             | 0.986 | <b>0.827</b> | 0.787        | 0.748 | 0.771        | 0.762        | 0.777        | 1000            |
| 0.1            | 0.3            | A1         | 16       | 3        | 3        | 5        | 0.805             | 0.984 | <b>0.781</b> | 0.725        | 0.674 | 0.697        | 0.685        | 0.710        | 1000            |
| 0.1            | 0.3            | A2         | 16       | 2        | 3        | 5        | 0.844             | 0.977 | <b>0.853</b> | 0.808        | 0.755 | 0.787        | 0.774        | 0.800        | 1000            |
| 0.1            | 0.3            | A2         | 14       | 2        | 3        | 10       | 0.849             | 0.983 | <b>0.850</b> | 0.800        | 0.751 | 0.777        | 0.769        | 0.790        | 1000            |
| 0.1            | 0.3            | A2         | 14       | 2        | 4        | 5        | 0.829             | 0.986 | <b>0.850</b> | <b>0.811</b> | 0.753 | 0.783        | 0.771        | 0.794        | 1000            |
| 0.1            | 0.3            | A2         | 12       | 3        | 3        | 5        | 0.826             | 0.979 | 0.860        | <b>0.807</b> | 0.733 | 0.769        | 0.757        | 0.783        | 1000            |
| 0.1            | 0.3            | A3         | 12       | 2        | 3        | 5        | 0.873             | 0.977 | 0.903        | <b>0.858</b> | 0.784 | 0.819        | 0.810        | 0.833        | 1000            |
| 0.1            | 0.3            | A3         | 10       | 3        | 3        | 5        | 0.898             | 0.984 | 0.930        | <b>0.887</b> | 0.824 | 0.862        | 0.846        | <b>0.874</b> | 1000            |
| 0.1            | 0.3            | A4         | 10       | 3        | 3        | 5        | 0.837             | 0.980 | 0.912        | <b>0.856</b> | 0.789 | <b>0.828</b> | <b>0.820</b> | <b>0.837</b> | 1000            |
| 0.5            | 0.7            | A1         | 26       | 2        | 4        | 5        | 0.823             | 0.968 | 0.724        | 0.692        | 0.657 | 0.673        | 0.674        | 0.681        | 1000            |
| 0.5            | 0.7            | A2         | 16       | 3        | 3        | 5        | 0.831             | 0.967 | <b>0.814</b> | 0.771        | 0.721 | 0.744        | 0.747        | 0.754        | 1000            |
| 0.5            | 0.7            | A3         | 12       | 2        | 4        | 5        | 0.827             | 0.930 | <b>0.819</b> | 0.760        | 0.688 | 0.726        | 0.732        | 0.738        | 1000            |
| 0.5            | 0.7            | A4         | 14       | 3        | 3        | 5        | 0.868             | 0.972 | 0.906        | <b>0.861</b> | 0.803 | 0.834        | 0.838        | <b>0.848</b> | 1000            |
| 0.8            | 0.9            | A2         | 30       | 3        | 3        | 5        | 0.804             | 0.969 | 0.772        | 0.751        | 0.724 | 0.737        | 0.743        | 0.745        | 1000            |
| 0.8            | 0.9            | A3         | 22       | 2        | 4        | 5        | 0.804             | 0.927 | <b>0.787</b> | 0.763        | 0.720 | 0.741        | 0.748        | 0.746        | 1000            |
| 0.8            | 0.9            | A4         | 28       | 2        | 4        | 5        | 0.824             | 0.966 | <b>0.831</b> | <b>0.807</b> | 0.778 | 0.795        | <b>0.799</b> | <b>0.799</b> | 1000            |
| 0.8            | 0.9            | A4         | 24       | 3        | 3        | 5        | 0.813             | 0.962 | <b>0.836</b> | <b>0.813</b> | 0.778 | <b>0.799</b> | <b>0.802</b> | <b>0.803</b> | 1000            |

<sup>a</sup> Bold text indicates acceptable empirical power (differing at most 2.6% from the predicted power).

<sup>b</sup> A1:  $\alpha = (0.4, 0.1, 0.03)$ ; A2:  $\alpha = (0.15, 0.08, 0.02)$ ; A3:  $\alpha = (0.1, 0.02, 0.01)$ ; A4:  $\alpha = (0.05, 0.05, 0.02)$ .

<sup>c</sup> Pred: Predicted power based on *t*-test.

<sup>d</sup> CR: Convergence rate (out of 1000) for assessing the empirical power.



## Web Appendix K: Web figures from simulation study

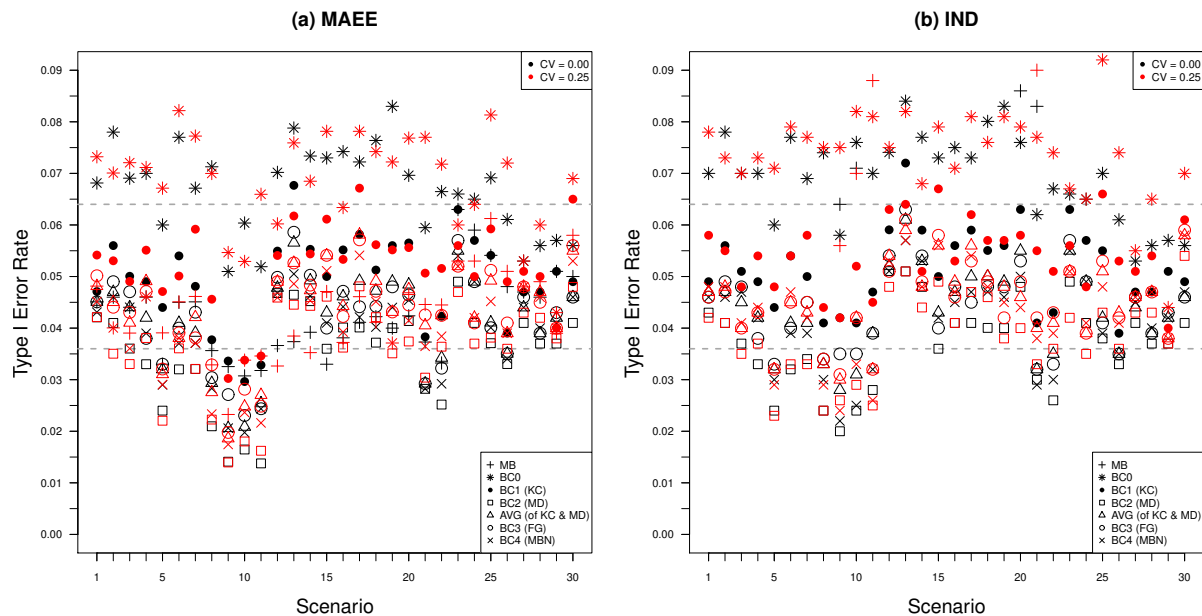

**Web Figure 1:** Empirical type I error rates of GEE analyses based on different variance estimators, using (a) the extended nested exchangeable working correlation structure with MAEE and (b) an independence working correlation matrix, under four-level CRTs with  $CV = 0.25$  compared to  $CV = 0.00$ . MB: Model-based variance estimator; BC0: Uncorrected sandwich estimator of [Liang and Zeger \(1986\)](#); BC1: Bias-corrected sandwich estimator of [Kauermann and Carroll \(2001\)](#); BC2: Bias-corrected sandwich estimator of [Mancl and DeRouen \(2001\)](#); AVG: Bias-corrected sandwich estimator with standard error as the average of those from BC1 and BC2; BC3: Bias-corrected sandwich estimator of [Fay and Graubard \(2001\)](#); BC4: Bias-corrected sandwich estimator of [Morel et al. \(2003\)](#).

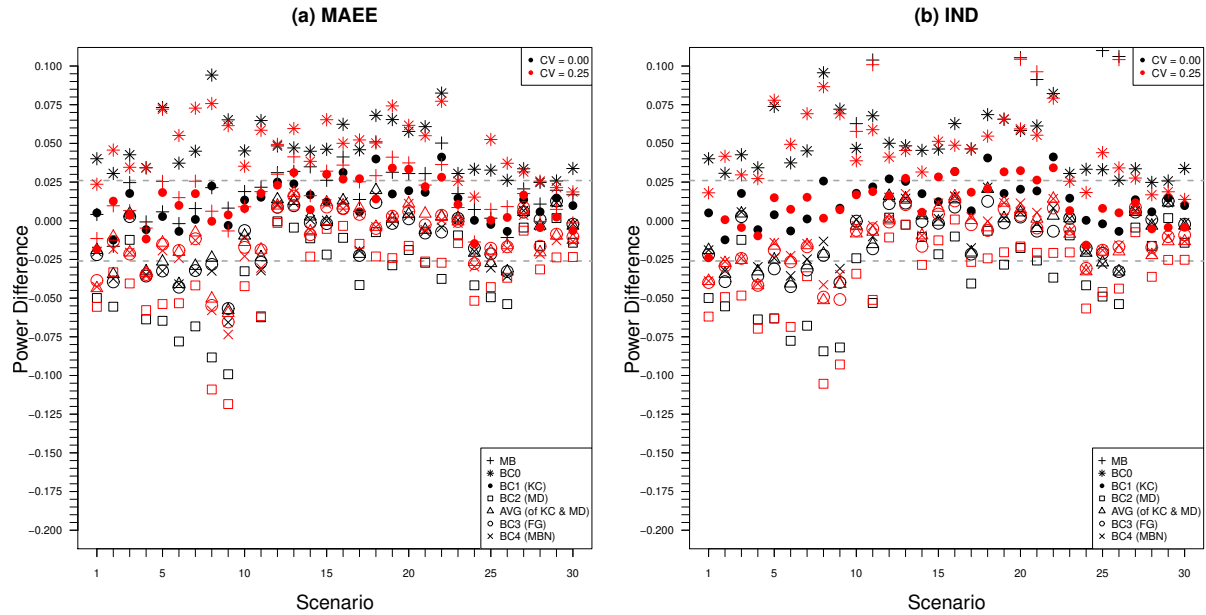

**Web Figure 2:** Difference between the empirical power and the predicted power of GEE analyses based on different variance estimators, using (a) the extended nested exchangeable working correlation structure with MAEE and (b) an independence working correlation matrix, under four-level CRTs with  $CV = 0.25$  compared to  $CV = 0.00$ . MB: Model-based variance estimator; BC0: Uncorrected sandwich estimator of Liang and Zeger (1986); BC1: Bias-corrected sandwich estimator of Kauermann and Carroll (2001); BC2: Bias-corrected sandwich estimator of Mancl and DeRouen (2001); AVG: Bias-corrected sandwich estimator with standard error as the average of those from BC1 and BC2; BC3: Bias-corrected sandwich estimator of Fay and Graubard (2001); BC4: Bias-corrected sandwich estimator of Morel et al. (2003).

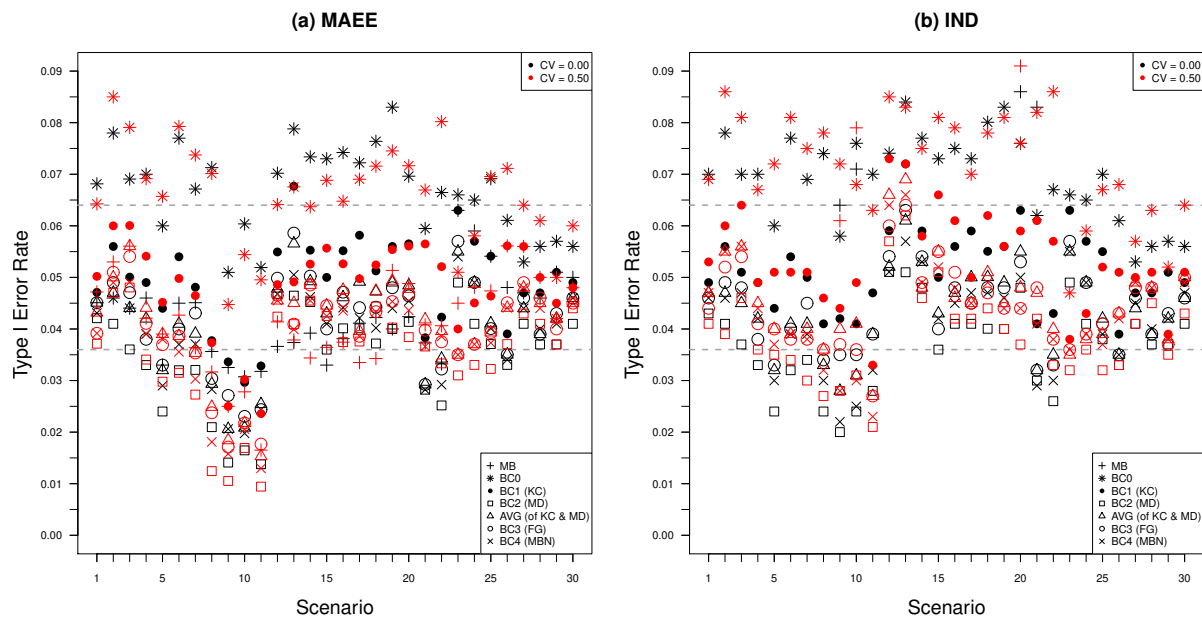

**Web Figure 3:** Empirical type I error rates of GEE analyses based on different variance estimators, using (a) the extended nested exchangeable working correlation structure with MAEE and (b) an independence working correlation matrix, under four-level CRTs with  $CV = 0.50$  compared to  $CV = 0.00$ . MB: Model-based variance estimator; BC0: Uncorrected sandwich estimator of [Liang and Zeger \(1986\)](#); BC1: Bias-corrected sandwich estimator of [Kauermann and Carroll \(2001\)](#); BC2: Bias-corrected sandwich estimator of [Mancl and DeRouen \(2001\)](#); AVG: Bias-corrected sandwich estimator with standard error as the average of those from BC1 and BC2; BC3: Bias-corrected sandwich estimator of [Fay and Graubard \(2001\)](#); BC4: Bias-corrected sandwich estimator of [Morel et al. \(2003\)](#).

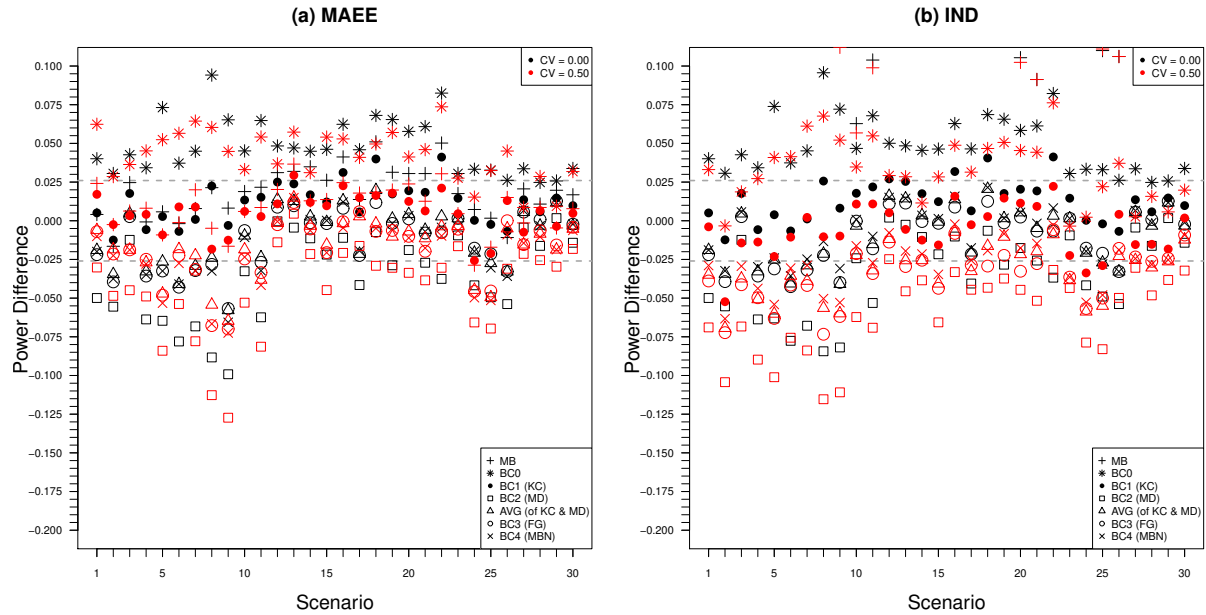

**Web Figure 4:** Difference between the empirical power and the predicted power of GEE analyses based on different variance estimators, using (a) the extended nested exchangeable working correlation structure with MAEE and (b) an independence working correlation matrix, under four-level CRTs with  $CV = 0.50$  compared to  $CV = 0.00$ . MB: Model-based variance estimator; BC0: Uncorrected sandwich estimator of Liang and Zeger (1986); BC1: Bias-corrected sandwich estimator of Kauermann and Carroll (2001); BC2: Bias-corrected sandwich estimator of Mancl and DeRouen (2001); AVG: Bias-corrected sandwich estimator with standard error as the average of those from BC1 and BC2; BC3: Bias-corrected sandwich estimator of Fay and Graubard (2001); BC4: Bias-corrected sandwich estimator of Morel et al. (2003).

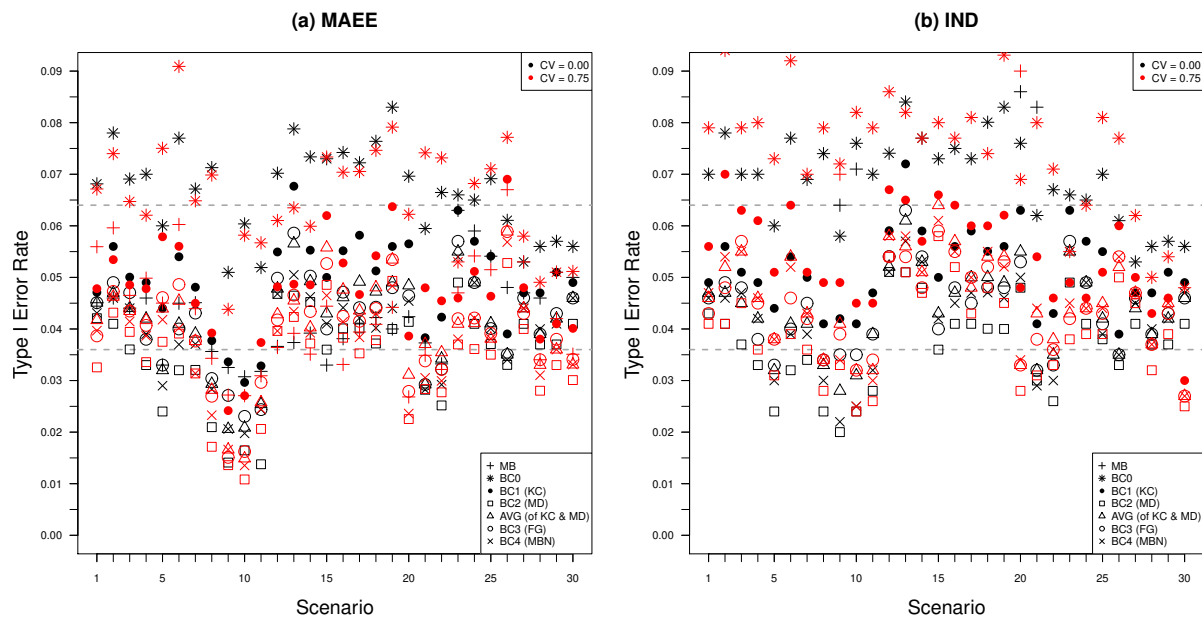

**Web Figure 5:** Empirical type I error rates of GEE analyses based on different variance estimators, using (a) the extended nested exchangeable working correlation structure with MAEE and (b) an independence working correlation matrix, under four-level CRTs with  $CV = 0.75$  compared to  $CV = 0.00$ . MB: Model-based variance estimator; BC0: Uncorrected sandwich estimator of [Liang and Zeger \(1986\)](#); BC1: Bias-corrected sandwich estimator of [Kauermann and Carroll \(2001\)](#); BC2: Bias-corrected sandwich estimator of [Mancl and DeRouen \(2001\)](#); AVG: Bias-corrected sandwich estimator with standard error as the average of those from BC1 and BC2; BC3: Bias-corrected sandwich estimator of [Fay and Graubard \(2001\)](#); BC4: Bias-corrected sandwich estimator of [Morel et al. \(2003\)](#).

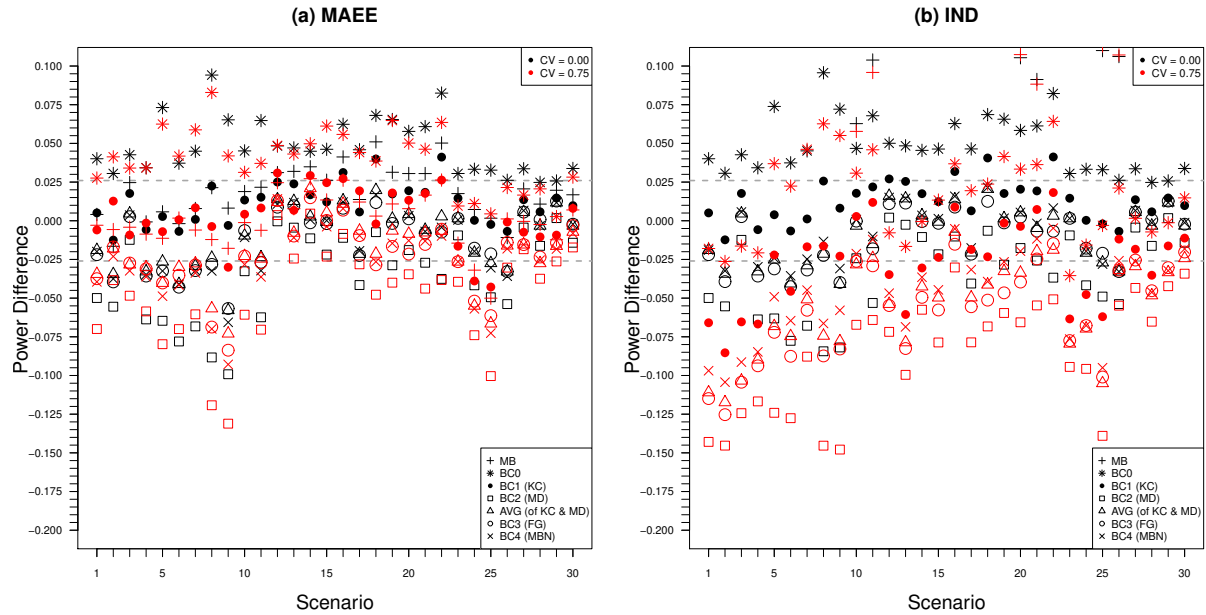

**Web Figure 6:** Difference between the empirical power and the predicted power of GEE analyses based on different variance estimators, using (a) the extended nested exchangeable working correlation structure with MAEE and (b) an independence working correlation matrix, under four-level CRTs with  $CV = 0.75$  compared to  $CV = 0.00$ . MB: Model-based variance estimator; BC0: Uncorrected sandwich estimator of Liang and Zeger (1986); BC1: Bias-corrected sandwich estimator of Kauermann and Carroll (2001); BC2: Bias-corrected sandwich estimator of Mancl and DeRouen (2001); AVG: Bias-corrected sandwich estimator with standard error as the average of those from BC1 and BC2; BC3: Bias-corrected sandwich estimator of Fay and Graubard (2001); BC4: Bias-corrected sandwich estimator of Morel et al. (2003).

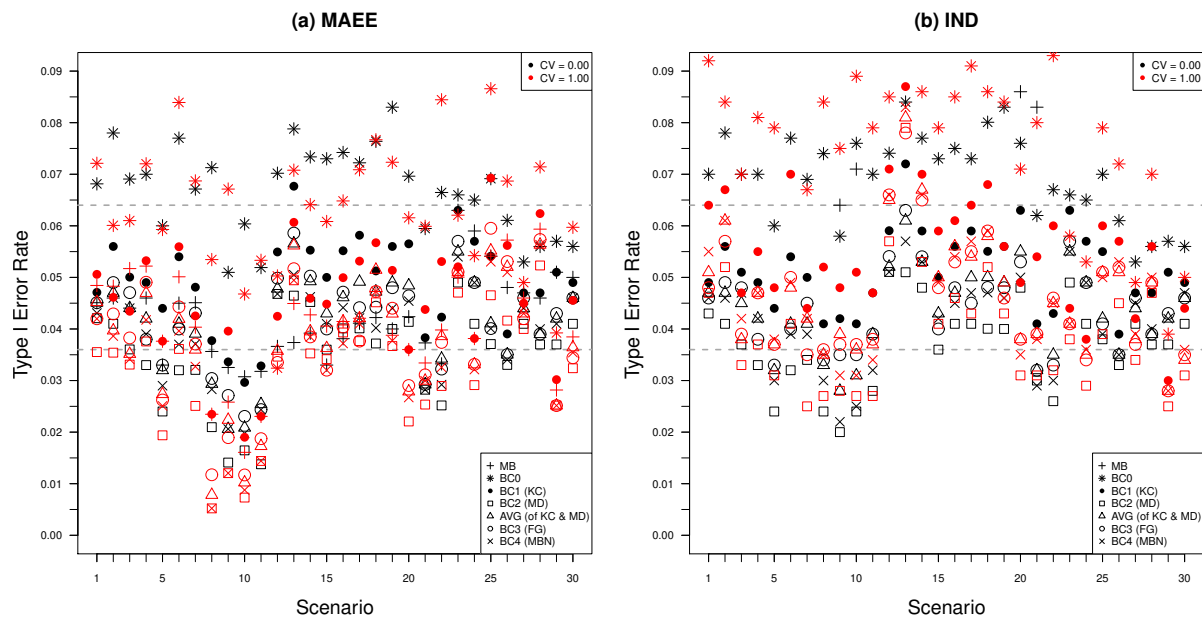

**Web Figure 7:** Empirical type I error rates of GEE analyses based on different variance estimators, using (a) the extended nested exchangeable working correlation structure with MAEE and (b) an independence working correlation matrix, under four-level CRTs with  $CV = 1.00$  compared to  $CV = 0.00$ . MB: Model-based variance estimator; BC0: Uncorrected sandwich estimator of [Liang and Zeger \(1986\)](#); BC1: Bias-corrected sandwich estimator of [Kauermann and Carroll \(2001\)](#); BC2: Bias-corrected sandwich estimator of [Mancl and DeRouen \(2001\)](#); AVG: Bias-corrected sandwich estimator with standard error as the average of those from BC1 and BC2; BC3: Bias-corrected sandwich estimator of [Fay and Graubard \(2001\)](#); BC4: Bias-corrected sandwich estimator of [Morel et al. \(2003\)](#).

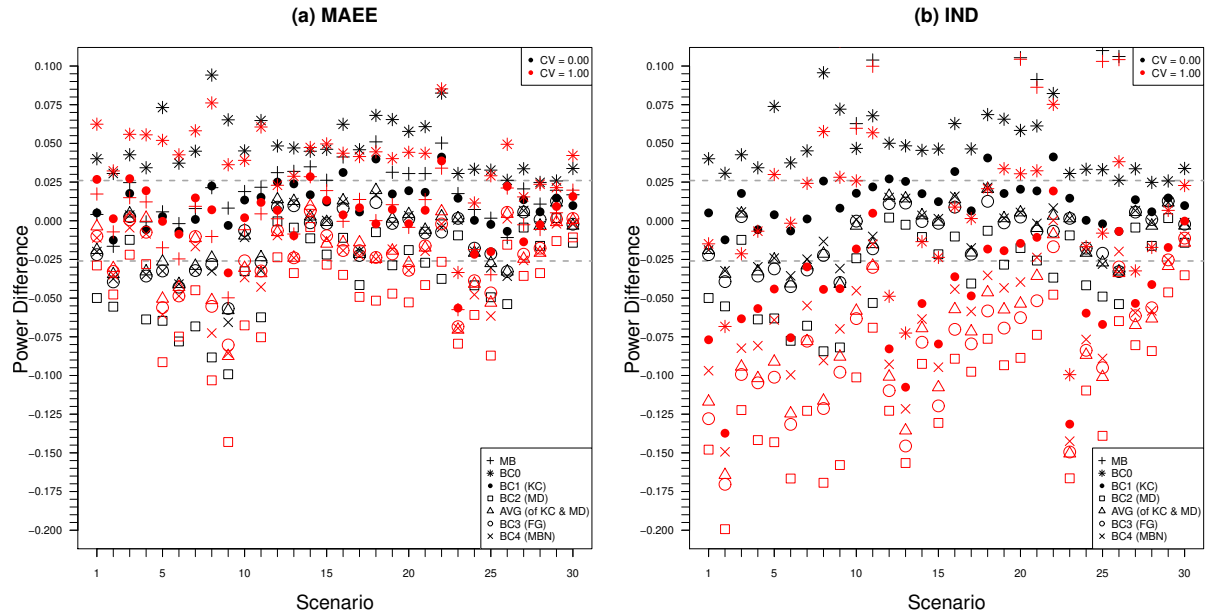

**Web Figure 8:** Difference between the empirical power and the predicted power of GEE analyses based on different variance estimators, using (a) the extended nested exchangeable working correlation structure with MAEE and (b) an independence working correlation matrix, under four-level CRTs with  $CV = 1.00$  compared to  $CV = 0.00$ . MB: Model-based variance estimator; BC0: Uncorrected sandwich estimator of Liang and Zeger (1986); BC1: Bias-corrected sandwich estimator of Kauermann and Carroll (2001); BC2: Bias-corrected sandwich estimator of Mancl and DeRouen (2001); AVG: Bias-corrected sandwich estimator with standard error as the average of those from BC1 and BC2; BC3: Bias-corrected sandwich estimator of Fay and Graubard (2001); BC4: Bias-corrected sandwich estimator of Morel et al. (2003).



## Web Appendix L

### Application of the proposed method to the RESHAPE trial under different link functions

Given the same assumptions for the RESHAPE trial as in Section 5.1 of the main paper, under the identity link function, Equation (10) and (4) of the main paper suggested that the required number of municipalities is  $N = 20$  with power of 80.10%. Web Figure 9 shows the sensitivity of power as a function of  $\alpha_1$  and  $\alpha_2$  at  $\alpha_0 = \{0.025, 0.05, 0.1\}$ , assuming  $N = 20$  under the identity link function.

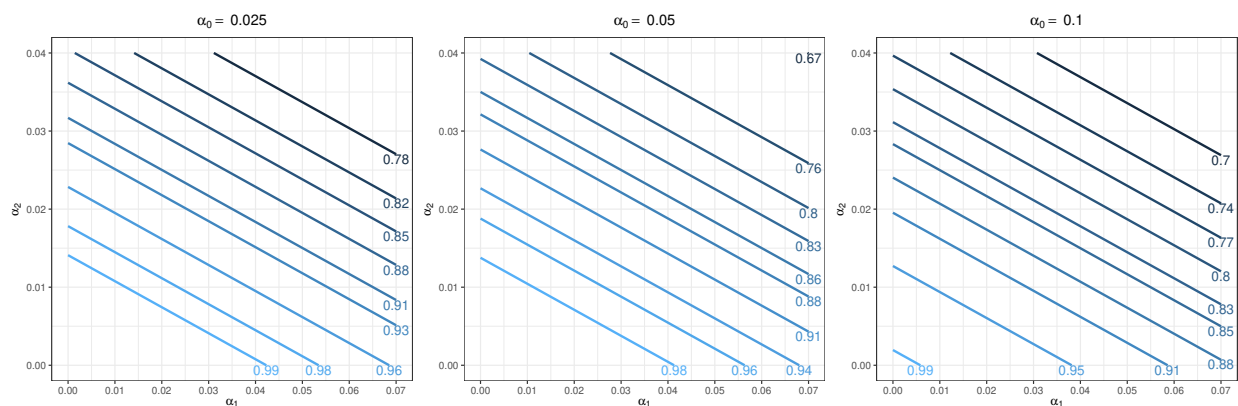

**Web Figure 9:** Predicted power contours as a function of  $\alpha_1$  and  $\alpha_2$  at  $\alpha_0 = \{0.025, 0.05, 0.1\}$ , with  $N = 20, M = 3, K = 3, L = 36, P_0 = 78.5\%, P_1 = 88\%$  for the RESHAPE trial, under the identity link function.

Under the log link function, Equation (11) and (4) of the main paper suggested that the required number of municipalities is  $N = 22$  with power of 82.91%. Web Figure 10 shows the sensitivity of power as a function of  $\alpha_1$  and  $\alpha_2$  at  $\alpha_0 = \{0.025, 0.05, 0.1\}$ , assuming  $N = 22$  under the log link function.

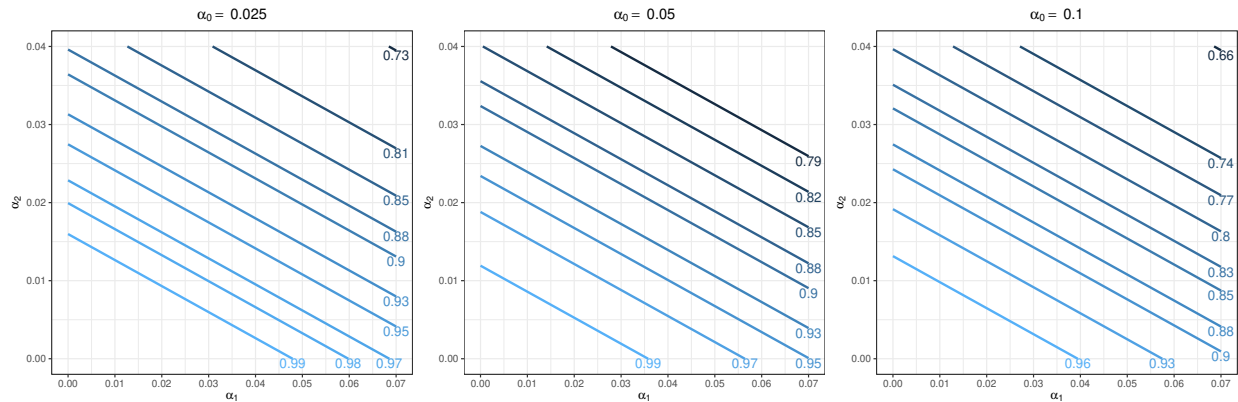

**Web Figure 10:** Predicted power contours as a function of  $\alpha_1$  and  $\alpha_2$  at  $\alpha_0 = \{0.025, 0.05, 0.1\}$ , with  $N = 22, M = 3, K = 3, L = 36, P_0 = 78.5\%, P_1 = 88\%$  for the RESHAPE trial, under the log link function.

### Randomization at lower levels under the RESHAPE trial context

**Web Table 20:** Required number of municipalities ( $N$ ) with  $M = 3, K = 3, L = 36, P_0 = 78.5\%, P_1 = 88\%, \alpha = (0.05, 0.04, 0.03)$  under the RESHAPE trial context, when randomization is hypothetically carried out in different levels.

| Randomization Level | Logit Link |        | Identity Link |        | Log Link |        |
|---------------------|------------|--------|---------------|--------|----------|--------|
|                     | $N$        | Power  | $N$           | Power  | $N$      | Power  |
| 4                   | 22         | 82.65% | 20            | 80.10% | 22       | 82.91% |
| 3                   | 8          | 91.78% | 8             | 92.66% | 8        | 90.55% |
| 2                   | 6          | 92.83% | 6             | 93.57% | 6        | 90.64% |
| 1                   | 6          | 96.69% | 6             | 97.04% | 6        | 95.11% |

### Application of the proposed method to the HALI trial under a different effect size

According to the results reported in Table 5 of Juke’s paper (Jukes et al., 2017), the effect size was 0.25 SD for spelling scores. Given  $M = 4, K = 25, L = 2, b = 0.25\sqrt{\phi}$ , and  $\alpha = (0.445, 0.104, 0.008)$ , Equation (8) and (4) of the main paper suggested that the required number of TAC tutor zones was  $N = 22$  with power of 81.43%. Web Figure 11 shows the sensitivity of power as a function of  $\alpha_1$  and  $\alpha_2$  at  $\alpha_0 = \{0.4, 0.445, 0.5\}$ , assuming  $N = 22$ .

Since there were 26 TAC tutor zones in the actual trial sample, we also calculated the power of the actual trial. Given  $N = 26, M = 4, K = 25, L = 2, b = 0.25\sqrt{\phi}$ , and  $\alpha = (0.445, 0.104, 0.008)$ ,

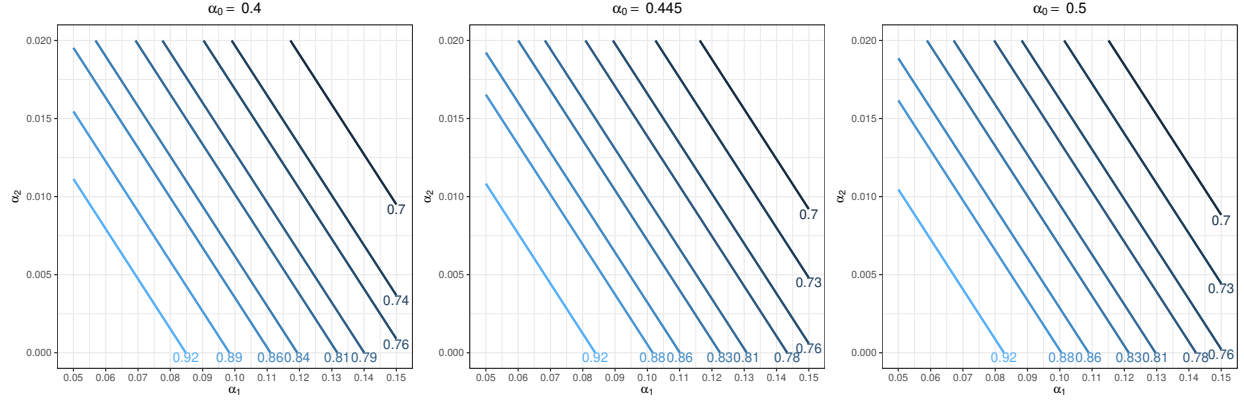

**Web Figure 11:** Predicted power contours as a function of  $\alpha_1$  and  $\alpha_2$  at  $\alpha_0 = \{0.4, 0.445, 0.5\}$ , with  $N = 22, M = 4, K = 25, L = 2, b = 0.25\sqrt{\phi}$  for the HALI trial.

using Equation (4) of the main paper, the power of the actual trial was 87.87%. Web Figure 12 shows the sensitivity of power as a function of  $\alpha_1$  and  $\alpha_2$  at  $\alpha_0 = \{0.4, 0.445, 0.5\}$ .

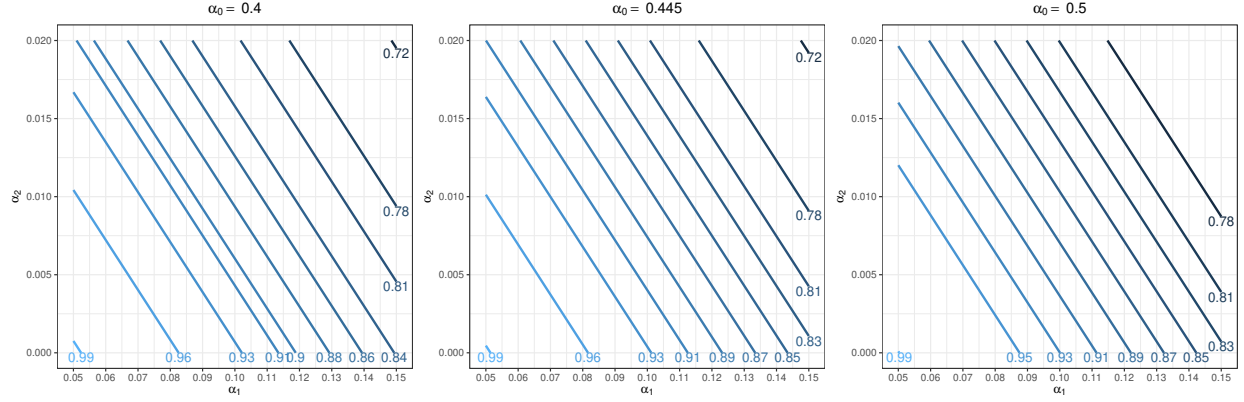

**Web Figure 12:** Predicted power contours as a function of  $\alpha_1$  and  $\alpha_2$  at  $\alpha_0 = \{0.4, 0.445, 0.5\}$ , with  $N = 26, M = 4, K = 25, L = 2, b = 0.25\sqrt{\phi}$  for the HALI trial.

**Randomization at lower levels under the HALI trial context**

**Web Table 21:** Required number of TAC tutor zones ( $N$ ) with  $M = 4, K = 25, L = 2, \alpha = (0.445, 0.104, 0.008)$  under the HALI trial context, when randomization is hypothetically carried out in different levels<sup>a</sup>.

| Effect Size per SD ( $b/\sqrt{\phi}$ ) | Randomization Level | $N$ | Power  |
|----------------------------------------|---------------------|-----|--------|
| 0.19                                   | 4                   | 36  | 80.87% |
|                                        | 3                   | 30  | 82.40% |
|                                        | 2                   | 8   | 81.52% |
| 0.25                                   | 4                   | 22  | 81.43% |
|                                        | 3                   | 18  | 81.75% |
|                                        | 2                   | 6   | 83.67% |

<sup>a</sup> For the HALI trial, we cannot randomize at level one because there are repeated measures at that level.

## References

- Fay, M. P. and Graubard, B. I. (2001). Small-sample adjustments for wald-type tests using sandwich estimators. *Biometrics* **57**, 1198–1206.
- Graybill, F. A. (1983). *Matrices with applications in statistics*. Number 512.896 G7 1983.
- Henderson, H. V. and Searle, S. R. (1981). On deriving the inverse of a sum of matrices. *Siam Review* **23**, 53–60.
- Jukes, M. C., Turner, E. L., Dubeck, M. M., Halliday, K. E., Inyega, H. N., Wolf, S., et al. (2017). Improving literacy instruction in kenya through teacher professional development and text messages support: A cluster randomized trial. *Journal of Research on Educational Effectiveness* **10**, 449–481.
- Kauermann, G. and Carroll, R. J. (2001). A note on the efficiency of sandwich covariance matrix estimation. *Journal of the American Statistical Association* **96**, 1387–1396.
- Li, F., Forbes, A. B., Turner, E. L., and Preisser, J. S. (2019). Power and sample size requirements for gee analyses of cluster randomized crossover trials. *Statistics in Medicine* **38**, 636–649.
- Li, F., Turner, E. L., and Preisser, J. S. (2018). Sample size determination for gee analyses of stepped wedge cluster randomized trials. *Biometrics* **74**, 1450–1458.
- Liang, K.-Y. and Zeger, S. L. (1986). Longitudinal data analysis using generalized linear models. *Biometrika* **73**, 13–22.
- Lu, B., Preisser, J. S., Qaqish, B. F., Suchindran, C., Bangdiwala, S. I., and Wolfson, M. (2007). A comparison of two bias-corrected covariance estimators for generalized estimating equations. *Biometrics* **63**, 935–941.
- Mancl, L. A. and DeRouen, T. A. (2001). A covariance estimator for gee with improved small-sample properties. *Biometrics* **57**, 126–134.

- Morel, J. G., Bokossa, M., and Neerchal, N. K. (2003). Small sample correction for the variance of gee estimators. *Biometrical Journal: Journal of Mathematical Methods in Biosciences* **45**, 395–409.
- Preisser, J. S., Young, M. L., Zaccaro, D. J., and Wolfson, M. (2003). An integrated population-averaged approach to the design, analysis and sample size determination of cluster-unit trials. *Statistics in medicine* **22**, 1235–1254.
- Scott, J. M., deCamp, A., Juraska, M., Fay, M. P., and Gilbert, P. B. (2017). Finite-sample corrected generalized estimating equation of population average treatment effects in stepped wedge cluster randomized trials. *Statistical methods in medical research* **26**, 583–597.
- Teerenstra, S., Lu, B., Preisser, J. S., Van Achterberg, T., and Borm, G. F. (2010). Sample size considerations for gee analyses of three-level cluster randomized trials. *Biometrics* **66**, 1230–1237.
